# Supplementary material for: Synthesis of dibenzosuberenone-based novel polycyclic π-conjugated dihydropyridazines, pyridazines and pyrroles
Source: publisher site journal article supplement (doi:10.3762/bjoc.17.61), 2021-03-15
Supplement: Additional file 1 [file 1860-5397-17-61-S1.pdf]

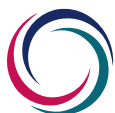

## Supporting Information

for

### Synthesis of dibenzosuberone-based novel polycyclic $\pi$ -conjugated dihydropyridazines, pyridazines and pyrroles

Ramazan Koçak and Arif Daştan

*Beilstein J. Org. Chem.* **2021**, *17*, 719–729. doi:10.3762/bjoc.17.61

### Experimental procedures, copies of $^1\text{H}$ NMR, $^{13}\text{C}$ NMR, and HRMS(Q-TOF) spectra

## Experimental

### General

The one and two dimensional  $^1\text{H}$  and  $^{13}\text{C}$  NMR spectra were recorded on a Varian-400 or a Bruker-400 spectrometer in  $\text{CDCl}_3$ ,  $\text{CD}_3\text{CN}$ , and  $\text{DMSO}-d_6$  using tetramethylsilane as the internal reference. All spectra were recorded at 25 °C and coupling constants ( $J$  values) are given in Hz. Chemical shifts are given in parts per million (ppm). Abbreviations used to define the multiplicities are as follows: s = singlet; d = doublet; dd = doublet of doublets; m = multiplet. Mass spectra were recorded on an Agilent Technologies 6530 Accurate-Mass Q-TOF-LC/MS spectrometer. Absorption spectrometry was performed using a Perkin Elmer Lambda 35 spectrophotometer. Steady-state fluorescence measurements were conducted using a Shimadzu RF-5301PC spectrofluorometer. Stock solutions of **3c-f** and **3k** ( $1 \times 10^{-3}$  M) were prepared in acetonitrile. The concentration of **3c-f** and **3k** for all spectroscopy measurement was kept at 5  $\mu\text{M}$  by diluting the stock solution. The reactions under microwave irradiation were carried out in a 300W CEM Discover microwave reactor.

### General procedure A: invers-Diels–Alder cycloaddition reactions between dibenzosuberone (**1**) and tetrazine derivatives

Dibenzosuberone (**1**) or *p*-quinone metide **11** and tetrazine **2** were dissolved in toluene in an ACE pressure tube. The reaction mixture was head and stirred. At the end of the reaction, the red color of tetrazine disappeared. The mixture was cooled to rt and some of the solvent was evaporated under reduced pressure. The precipitated product was purified by crystallization or silica gel column chromatography to give dihydropyridazines.

### General procedure B: Oxidation with PIFA

To a solution of **3**, **13** or **15** in 20 mL of  $\text{CH}_2\text{Cl}_2$  was added PIFA and this was stirred at room temperature for 1 h to overnight. The solvent was evaporated, and the crude product was purified by column chromatography and crystallization to give corresponding oxidized products **4**, **14** and **16**.

### General procedure C: Ring contraction of pyridazines to pyrroles

Zinc dust was added to a solution of pyridazine **4a,b** and **13a,b** in 10 mL of glacial acetic acid and the reaction was stirred. At the end of the reaction, mixture was filtered through Celite®, the filtrate was neutralized with the addition of saturated aqueous  $\text{NaHCO}_3$ , and extracted with EtOAc ( $2 \times 25$ ). The combined organic layer was dried over  $\text{Na}_2\text{SO}_4$  and evaporated under vacuo. The obtained solid was purified by column

chromatography and crystallization to give related pyrrole (**10aa**, **10ab**, **10ba** and **15a,b**).

**1,4-Di(pyridin-4-yl)-2,4a-dihydro-9H-dibenzo[3,4:6,7]cyclohepta[1,2-*d*]pyridazin-9-one (3c)**

The reaction was performed according to the general procedure A with **1** (1.0 g, 4.85 mmol) and tetrazine **2c** (575 mg, 2.43 mmol) in 3 mL toluene at 125 °C for 16 h. The precipitated product was filtrated, washed with Et<sub>2</sub>O and recrystallized from *n*-hexane/CH<sub>2</sub>Cl<sub>2</sub> (1:9) to give **3c** as yellow crystals (yield 1.93 g, 96%). Mp: 294-296 °C. <sup>1</sup>H-NMR (400 M Hz, CDCl<sub>3</sub>): δ=8.60 (d, *J* = 5.8 Hz, 2H), 8.57-8.52 (m, 3H), 8.28 (bs, NH, 1H), 7.98 (dd, *J* = 7.0 Hz, *J* = 1.4 Hz, 1H), 7.61 (d, *J* = 5.9 Hz, 2H), 7.44-7.33 (m, 3H), 7.20-7.13 (m, 3H), 6.86 (d, *J* = 7.5 Hz, 2H), 5.15 (s, 1H). <sup>13</sup>C-NMR (100 M Hz, CDCl<sub>3</sub>): δ=193.4, 150.8, 150.4, 142.9, 141.9, 138.41, 137.37, 137.3, 137.1, 135.6, 132.7, 132.5, 132.2, 132.0, 131.9, 131.6, 127.71, 127.65, 124.0, 123.95, 120.2, 106.1, 40.9. HRMS (Q-TOF): *m/z* [M + H]<sup>+</sup> calcd for C<sub>27</sub>H<sub>19</sub>N<sub>4</sub>O: 415.1559, found: 415.1549.

**1,4-Bis(3,5-dimethyl-1H-pyrazol-1-yl)-2,4a-dihydro-9H-dibenzo[3,4:6,7]cyclohepta[1,2-*d*]pyridazin-9-one (3d).**

The reaction was performed according to the general procedure A with **1** (1.14 g, 5.55 mmol) and tetrazine **2d** (1.0 g, 3.70 mmol) in 2 mL toluene at 120 °C for 48 h. The product was purified by column chromatography (SiO<sub>2</sub>, *n*-hexane/EtOAc (4:1) to give **3d** as an orange solid (yield 1.44 g, 87%). Mp: 228-230 °C. <sup>1</sup>H-NMR (400 M Hz, CDCl<sub>3</sub>): δ=8.46 (d, *J* = 7.9 Hz, 1H), 7.84 (bs, NH, 1H), 7.82 (d, *J* = 7.9 Hz, 1H), 7.43 (t, *J* = 7.5 Hz, 1H), 7.34 (d, *J* = 7.4 Hz, 1H), 7.30 (d, *J* = 7.4 Hz, 1H), 7.28-7.23 (m, 1H), 7.00 (d, *J* = 7.7 Hz, 1H), 6.68 (d, *J* = 7.7 Hz, 1H), 5.90 (s, 1H), 5.75 (s, 1H), 5.72 (s, 1H), 2.61 (s, 3H), 2.27 (s, 3H), 2.08 (s, 3H), 1.12 (s, 3H). <sup>13</sup>C-NMR (100 M Hz, CDCl<sub>3</sub>): δ=194.2, 151.3, 149.7, 142.5, 141.8, 138.4, 137.6, 137.5, 137.4, 136.2, 132.9, 132.2, 131.6, 131.3, 130.8, 129.2, 127.2, 127.0, 123.4, 109.4, 107.8, 100.5, 42.6, 14.8, 13.8, 13.7, 10.4. HRMS (Q-TOF): *m/z* [M + H]<sup>+</sup> calcd for C<sub>27</sub>H<sub>25</sub>N<sub>6</sub>O: 449.2090, found: 449.2085.

**9-Oxo-4a,9-dihydro-2H-dibenzo[3,4:6,7]cyclohepta[1,2-*d*]pyridazine-1,4-dicarboxamide (3e)**

The reaction was performed according to the general procedure A with **1** (1.0 g, 4.85 mmol) and tetrazine **2e** (163 mg, 0.97 mmol) at 100 °C for overnight (solvent free). The product was filtered, washed with Et<sub>2</sub>O and recrystallized from *n*-hexane/CH<sub>2</sub>Cl<sub>2</sub> (1:9) to give **3e** as green crystals (yield 292 mg, 95%). Mp: 282-283 °C decomposition. <sup>1</sup>H-NMR (400 M Hz, DMSO-*d*<sub>6</sub>): δ= 10.79 (bs, 1H, NH), 8.35 (d, *J* = 7.8 Hz, 1H), 7.77 (d, *J* = 7.8 Hz, 1H), 7.69-7.63 (m, 2H), 7.60 (s, 1H), 7.58-7.45 (m, 4H), 7.38 (s, 1H), 7.35 (d, *J* = 7.6 Hz, 1H), 6.67 (d, *J* = 7.6 Hz, 1H), 4.99 (s, 1H). <sup>13</sup>C-NMR (100 M Hz, DMSO-*d*<sub>6</sub>): δ= 192.8, 165.5, 164.7, 138.6, 138.4, 138.1, 136.2, 132.5, 132.2, 131.2, 131.0, 130.4, 130.0, 129.7, 127.5, 126.7, 123.2, 105.2, 36.6. HRMS (Q-TOF): *m/z* [M + H]<sup>+</sup> calcd for C<sub>19</sub>H<sub>15</sub>N<sub>4</sub>O<sub>3</sub>: 347.1144, found: 347.1137.

### 9-Oxo-4a,9-dihydro-2*H*-dibenzo[3,4:6,7]cyclohepta[1,2-*d*]pyridazine-1,4-dicarbonitrile (**3f**)

The reaction was performed according to the general procedure A with **1** (500 mg, 2.42 mmol) and tetrazine **2f** (160 mg, 1.21 mmol) in 5 mL toluene at 100 °C for 2 h. The precipitated product was filtrated, washed with Et<sub>2</sub>O and recrystallized from *n*-hexane/CH<sub>2</sub>Cl<sub>2</sub> (1:9) to give **3f** as agreen crystals (yield 1.31g, 87%). Mp: 245-246 °C. <sup>1</sup>H-NMR (400 M Hz, CDCl<sub>3</sub>): δ= 8.53 (dd, *J* = 7.1 Hz, *J* = 1.5 Hz, 1H), 8.39 (bs, 1H, NH), 7.88 (d, *J* = 7.8 Hz, 1H), 7.84 (d, *J* = 7.1 Hz, 1H), 7.73-7.64 (m, 2H), 7.58 (t, *J* = 7.5 Hz, 1H), 7.47 (t, *J* = 7.5 Hz, 1H), 6.99 (t, *J* = 7.6 Hz, 1H), 4.94 (s, 1H). <sup>13</sup>C-NMR (100 M Hz, CDCl<sub>3</sub>): δ= 192.1, 138.4, 137.2, 133.9, 133.23, 133.18, 132.9, 132.5, 132.3, 131.2, 129.3, 129.0, 123.6, 122.45, 115.4, 114.5, 112.6, 107.8, 41.9. HRMS (Q-TOF): *m/z* [M + H]<sup>+</sup> calcd for C<sub>19</sub>H<sub>11</sub>N<sub>4</sub>O: 311.0933, found: 311.0931.

### Reaction of Dibenzosuberone (**1**) with 3,6-dichloro-1,2,4,5-tetrazine (**2k**).

The reaction was performed according to the general procedure A with **1** (1.14 g, 5.55 mmol) and tetrazine **2k** (0.56 g, 3.70 mmol) in 10 mL toluene at 120 °C for 48 h. The crude reaction products was purified by column chromatography on silica gel (10% EtOAc/*n*-hexane).

1. Fraction: **1,4-Dichloro-2,4a-dihydro-9*H*-dibenzo[3,4:6,7]cyclohepta[1,2-*d*]pyridazin-9-one (**3k**)**. Yellow solid (yield 164 mg, 27%). Mp: 223-224 °C. <sup>1</sup>H-NMR (400 M Hz, CDCl<sub>3</sub>): δ=8.49 (dd, *J* = 8.0 Hz, *J* = 1.5 Hz, 1H), 7.87 (dd, *J* = 7.6 Hz, *J* = 1.3 Hz, 1H), 7.83 (dd, *J* = 7.7 Hz, *J* = 1.0 Hz, 1H), 7.57 (dt, *J* = 7.6 Hz, *J* = 1.5 Hz, 1H), 7.53 (dt, *J* = 7.7 Hz, *J* = 1.3 Hz, 1H), 7.48 (dt, *J* = 8.0 Hz, *J* = 1.3 Hz, 1H), 7.41 (s, 1H, NH), 7.40 (dt, *J* = 7.6 Hz, *J* = 1.0 Hz, 1H), 7.09 (d, *J* = 7.6 Hz, 1H), 4.90 (s, 1H). <sup>13</sup>C-NMR (100 M Hz, CDCl<sub>3</sub>): δ=192.9, 138.4, 136.3, 136.0, 135.5, 134.4, 132.7, 132.5, 131.9, 131.8, 130.2, 128.1, 127.9, 124.7, 123.1, 102.8, 50.0. HRMS (Q-TOF): *m/z* [M + H]<sup>+</sup> calcd for C<sub>17</sub>H<sub>11</sub>Cl<sub>2</sub>N<sub>2</sub>O: 329.0248, found: 329.0248.

2. Fraction: **1,4-Dichloro-9*H*-dibenzo[3,4:6,7]cyclohepta[1,2-*d*]pyridazin-9-one (**4k**)**. Colorless solid (yield 199 mg, 33%). Mp: 257-258 °C. <sup>1</sup>H-NMR (400 M Hz, CDCl<sub>3</sub>): δ=7.96-7.90 (m, 2H), 7.63-7.56 (m, 6H). <sup>13</sup>C-NMR (100 M Hz, CDCl<sub>3</sub>): δ=196.1, 155.8, 146.2, 135.9, 131.42, 131.39, 130.0, 127.3, 126.0. HRMS (Q-TOF): *m/z* [M + H]<sup>+</sup> calcd for C<sub>17</sub>H<sub>9</sub>Cl<sub>2</sub>N<sub>2</sub>O: 327,0092, found: 327,0088.

### Reaction of dibenzosuberone (**1**) with 3,6-dibromo-1,2,4,5-tetrazine (**3l**).

The reaction was performed according to the general procedure A with **1** (1.0 g, 4.85 mmol) and tetrazine **2l** (235 mg, 0.98 mmol) at 100 °C for overnight (solvent free). The crude reaction products was purified by recrystallization from CH<sub>2</sub>Cl<sub>2</sub>/*n*-Hexane (9:1). Pyridazine **4l** was obtained by first crystallization. Then recrystallization of the residue afforded diboromo **5l**.

1. Fraction: **1,4-Dibromo-9H-dibenzo[3,4:6,7]cyclohepta[1,2-d]pyridazin-9-one (4I)**. Colorless solid (yield 186 mg, 46%). Mp: 300-301 °C. <sup>1</sup>H-NMR (400 M Hz, CDCl<sub>3</sub>): δ=7.98-7.92 (m, 2H), 7.61-7.53 (m, 6H). <sup>13</sup>C-NMR (100 M Hz, CDCl<sub>3</sub>): δ=196.0, 149.8, 146.1, 137.4, 131.7, 131.4, 129.9, 128.8, 125.8. HRMS (Q-TOF): *m/z* [M + H]<sup>+</sup> calcd for C<sub>17</sub>H<sub>9</sub>Br<sub>2</sub>N<sub>2</sub>O: 416.9061, found: 416.9045.

2. Fraction: **10,11-ibromo-10,11-dihydro-5H-dibenzo[a,d][7]annulen-5-one (5I)**. Colorless solid (yield 107 mg, 30%). Mp: 204-206 °C. <sup>1</sup>H-NMR (400 M Hz, CDCl<sub>3</sub>): δ= 8.09 (dd, *J* = 7.9 Hz, *J* = 1.5 Hz, 2H), 7.57 (dt, *J* = 7.3 Hz, *J* = 1.5 Hz, 2H), 7.50 (dt, *J* = 7.9 Hz, *J* = 1.5 Hz, 2H), 7.41 (d6, *J* = 7.3 Hz, *J* = 1.5 Hz, 2H), 5.80 (s, 2H). <sup>13</sup>C-NMR (100 M Hz, CDCl<sub>3</sub>): δ= 192.3, 138.1, 136.8, 132.9, 131.6, 131.1, 129.7, 52.9. HRMS (Q-TOF): *m/z* [M + H]<sup>+</sup> calcd for C<sub>15</sub>H<sub>11</sub>Br<sub>2</sub>O: 364.9177, found: 364.9165.

#### **Dimethyl 9-oxo-9H-dibenzo[3,4:6,7]cyclohepta[1,2-d]pyridazine-1,4-dicarboxylate (4a)**

The reaction was performed according to the general procedure B with **3a** (1 g, 2.66 mmol) and PIFA (1.14 g, 2.66 mmol) at room teperature for 1 h. The product was purified by gradial chromatography (Al<sub>2</sub>O<sub>3</sub>, hexane then CH<sub>2</sub>Cl<sub>2</sub>/EtOAc (1:1)) and recrystallization from CH<sub>3</sub>COOH to give **4a** as a colorless crystal (945 mg, 95% yield). mp = 224-225 °C. <sup>1</sup>H-NMR (400 M Hz, CDCl<sub>3</sub>): δ= 7.76-7.72 (m, 2H), 7.66-7.55 (m, 6H), 3.80 (s 6H). <sup>13</sup>C-NMR (100 M Hz, CDCl<sub>3</sub>): δ= 195.3, 165.8, 154.9, 145.1, 133.2, 131.3, 131.1, 128.9, 128.5, 127.3, 53.3. HRMS (Q-TOF): *m/z* [M + H]<sup>+</sup> calcd. for C<sub>21</sub>H<sub>15</sub>N<sub>2</sub>O<sub>5</sub>: 375.0981, found: 375.0974.

#### **1,4-Di(pyridin-2-yl)-9H-dibenzo[3,4:6,7]cyclohepta[1,2-d]pyridazin-9-one (4b)**

The reaction was performed according to the general procedure B with **3b** (1 g, 2.41 mmol) and PIFA (1.04 g, 2.41 mmol) at room teperature °C for 1 h. The product was purified by gradial chromatography (Al<sub>2</sub>O<sub>3</sub>, hexane then MeOH/EtOAc (1:4)) and recrystallization from MeOH/diethyl ether (9:1) to give **4b** as a colorless crystal (896 mg, 90% yield). mp = 248 °C (decomposition). <sup>1</sup>H-NMR (400 M Hz, CDCl<sub>3</sub>): δ= 8.49 (bd, *J* = 4.7 Hz, 2H), 7.73 (dt, *J* = 7.7 Hz, *J* = 1.7 Hz, 2H), 7.67-7.62 (m, 4H), 7.37 (dt, *J* = 7.6 Hz, *J* = 1.2 Hz, 2H), 7.27 (m, 2H), 7.05 (dt, *J* = 7.7 Hz, *J* = 1.3 Hz, 2H), 6.98 (bd, *J* = 7.8 Hz, 2H). <sup>13</sup>C-NMR (100 M Hz, CDCl<sub>3</sub>): δ= 196.8, 158.8, 156.4, 149.3, 146.0, 136.5, 133.9, 131.7, 130.2, 129.53, 129.46, 126.2, 125.0, 123.2. HRMS (Q-TOF): *m/z* [M + H]<sup>+</sup> calcd. for C<sub>27</sub>H<sub>17</sub>N<sub>4</sub>O: 413.1402, found: 413.1392.

#### **1,4-Di(pyridin-4-yl)-9H-dibenzo[3,4:6,7]cyclohepta[1,2-d]pyridazin-9-one (4c)**

The reaction was performed according to the general procedure B with **3c** (1.0 g, 2.41 mmol) and PIFA (1.56 g, 3.62 mmol) at room teperature °C for overnight. The product was purified by column chromatography (SiO<sub>2</sub>, *n*-hexane/EtOAc (3:7)) and recrystallization from MeOH/diethyl ether (9:1) to give **4c** as a colorless crystal (866 mg, 87% yield). mp > 300 °C. <sup>1</sup>H-NMR (400 MHz, DMSO-*d*<sub>6</sub>): δ= 8.59 (d, *J* = 4.7 Hz,

4H), 7.64 (d,  $J = 7.7$  Hz, 2H), 7.55 (t,  $J = 7.5$  Hz, 2H), 7.33 (d,  $J = 4.7$  Hz, 4H), 7.24 (t,  $J = 7.6$  Hz, 2H), 7.14 (d,  $J = 7.8$  Hz, 2H).  $^{13}\text{C}$ -NMR (100 MHz, DMSO- $d_6$ ):  $\delta = 195.6, 157.6, 149.5, 145.6, 145.4, 133.2, 132.3, 130.6, 130.0, 128.6, 125.9, 124.3$ . HRMS (Q-TOF):  $m/z$   $[\text{M} + \text{H}]^+$  calcd. for  $\text{C}_{27}\text{H}_{17}\text{N}_4\text{O}$ : 413.1402, found: 413.1393.

#### **1,4-Bis(3,5-dimethyl-1*H*-pyrazol-1-yl)-9*H*-dibenzo[3,4:6,7]cyclohepta[1,2-*d*]pyridazin-9-one (4d)**

The reaction was performed according to the general procedure B with **3d** (500 mg, 1.11 mmol) and PIFA (575 mg, 1.34 mmol) at room temperature for 4 h. The product was purified by column chromatography ( $\text{SiO}_2$ ,  $n$ -hexane/EtOAc (7:3)) and recrystallization from  $\text{CH}_2\text{Cl}_2/n$ -hexane (9:1) to give **4d** as a white crystal (453 mg, 91% yield). mp = 315–317 °C (decomposed).  $^1\text{H}$ -NMR (400 MHz,  $\text{CDCl}_3$ ):  $\delta = 7.60$  (d,  $J = 7.6$  Hz, 2H), 7.45 (t,  $J = 7.5$  Hz, 2H), 7.22 (t,  $J = 7.6$  Hz, 2H), 6.87 (d,  $J = 7.9$  Hz, 2H), 5.92 (s, 2H), 2.17 (s, 6H), 2.00 (s, 6H).  $^{13}\text{C}$ -NMR (100 MHz,  $\text{CDCl}_3$ ):  $\delta = 195.9, 153.9, 151.1, 146.0, 141.8, 133.9, 130.4, 130.4, 129.0, 127.9, 126.4, 107.7, 13.6, 11.4$ . HRMS (Q-TOF):  $m/z$   $[\text{M} + \text{H}]^+$  calcd. for  $\text{C}_{27}\text{H}_{23}\text{N}_6\text{O}$ : 447.1933, found: 447.1924.

#### **9-Oxo-9*H*-dibenzo[3,4:6,7]cyclohepta[1,2-*d*]pyridazine-1,4-dicarboxamide (4e)**

Nitrous gases, generated by adding conc. HCl (4.00 mL) to a solution of  $\text{NaNO}_2$  (2.48 g) in water (6.00 mL), were bubbled at 0 °C through a solution of dihydropyridazine **3e** (100 mg, 0.30 mmol) in  $\text{CH}_2\text{Cl}_2$  (20.0 mL). The reaction mixture was stirred at the same temperature for 1 h. Excess gases and the some solvent were removed under reduced pressure. After the precipitated product was filtered and wash with  $\text{CH}_2\text{Cl}_2$ , pyridazine **4e** (82.5 mg, 83%) was obtained as a white solid. mp > 300 °C.  $^1\text{H}$ -NMR (400 MHz, DMSO- $d_6$ ):  $\delta = 8.36$  (bs, NH, 2H), 7.95 (bs, NH, 2H), 7.89–7.85 (m, 2H), 7.69–7.57 (m, 6H).  $^{13}\text{C}$ -NMR (100 MHz, DMSO- $d_6$ ):  $\delta = 196.0, 167.5, 157.4, 144.68, 131.73, 130.9, 130.8, 129.5, 128.7, 125.9$ . HRMS (Q-TOF):  $m/z$   $[\text{M} + \text{H}]^+$  calcd. for  $\text{C}_{19}\text{H}_{13}\text{N}_4\text{O}_3$ : 345.0988, found: 345.0979.

**Caution:** When working with nitrous gases a well ventilated fume hood is essential.

#### **9-Oxo-9*H*-dibenzo[3,4:6,7]cyclohepta[1,2-*d*]pyridazine-1,4-dicarbonitrile (4f)**

The reaction was performed according to the general procedure B with **3f** ((500 mg, 1.61 mmol) and PIFA (693 mg, 1.61 mmol) at room temperature for overnight. The product was purified by column chromatography ( $\text{SiO}_2$ ,  $n$ -hexane/EtOAc (4:1)) to give **4f** as a white solid (392 mg, 79% yield). mp > 300 °C.  $^1\text{H}$ -NMR (400 MHz, DMSO- $d_6$ ):  $\delta = 8.33$  (d,  $J = 7.0$  Hz, 2H), 7.91–7.82 (m, 4H), 7.77–7.72 (m, 2H).  $^{13}\text{C}$ -NMR (100 MHz, DMSO- $d_6$ ):  $\delta = 193.7, 145.1, 140.0, 138.0, 132.8, 131.5, 130.8, 127.0, 125.8, 115.7$ . HRMS (Q-TOF):  $m/z$   $[\text{M} + \text{H}]^+$  calcd. for  $\text{C}_{19}\text{H}_9\text{N}_4\text{O}$ : 309.0776, found: 309.0763.

**Dimethyl 8-oxo-2,8-dihydrodibenzo[3,4:6,7]cyclohepta[1,2-*c*]pyrrole-1,3-dicarboxylate (10aa)**

The reaction was performed according to the general procedure C with **4a** (500 mg, 1.34 mmol) and Zinc dust (436.6 mg, 6.68 mmol) at room temperature °C for overnight. The product was purified by column chromatography (SiO<sub>2</sub>, EtOAc/*n*-Hexane (1:4) and recrystallization from CH<sub>2</sub>Cl<sub>2</sub> to give **10aa** as a colorless crystal (369 mg, 82% yield). mp = 249-250 °C. <sup>1</sup>H-NMR (400 MHz, CDCl<sub>3</sub>): δ= 10.11 (bs, NH, 1H), 7.80 (dd, *J* = 7.8 Hz, *J* = 1.1 Hz, 2H), 7.60 (dd, *J* = 7.5 Hz, *J* = 1.5 Hz, 2H), 7.49 (dt, *J* = 7.6 Hz, *J* = 1.6 Hz, 2H), 7.44 (dt, *J* = 7.5 Hz, *J* = 1.3 Hz, 2H), 3.86 (s, 6H). <sup>13</sup>C-NMR (100 MHz, CDCl<sub>3</sub>): δ= 199.7, 160.2, 143.0, 131.4, 129.6, 128.5, 128.3, 127.7, 126.3, 121.3, 52.1. HRMS (Q-TOF): *m/z* [M + H]<sup>+</sup> calcd. for C<sub>21</sub>H<sub>16</sub>NO<sub>5</sub>: 362.1028, found: 362.1028.

**Dimethyl 8-hydroxy-2,8-dihydrodibenzo[3,4:6,7]cyclohepta[1,2-*c*]pyrrole-1,3-dicarboxylate 10ab**

The reaction was performed according to the general procedure C with **4a** (500 mg, 1.34 mmol) and Zinc dust (873 mg, 13.36 mmol) at room temperature for overnight. The product was purified by column chromatography (SiO<sub>2</sub>, EtOAc/*n*-Hexane (1:4) and recrystallization from CH<sub>2</sub>Cl<sub>2</sub> to give **10aa** as a colorless crystal (359 mg, 74% yield). mp = 245-246 °C. <sup>1</sup>H-NMR (400 MHz, CDCl<sub>3</sub>): δ= 10.08 (bs, 1H, NH), 7.72 (bd, *J* = 7.8 Hz, 2H), 7.57 (dd, *J* = 7.6 Hz, *J* = 0.8 Hz, 2H), 7.37 (dt, *J* = 7.7 Hz, *J* = 1.0 Hz, 2H), 7.21 (dt, *J* = 7.5 Hz, *J* = 1.1 Hz, 2H), 5.45 (s, 1H), 3.84 (s, 6H), 2.25 (bs, 1H). <sup>13</sup>C-NMR (100 MHz, CDCl<sub>3</sub>): δ= 160.7, 143.7, 130.9, 129.1, 128.4, 126.7, 125.5, 120.7, 120.0, 70.3, 52.0. HRMS (Q-TOF): *m/z* [M + H]<sup>+</sup> calcd. for C<sub>21</sub>H<sub>18</sub>NO<sub>5</sub>: 364.1185, found: 364.1171.

**2,8-Dihydrodibenzo[3,4:6,7]cyclohepta[1,2-*c*]pyrrol-8-ol (10ac)**

A 10 mL round bottom microwave vial equipped with a stir bar was charged with pyrrole **10ab** (200 mg 0.55 mmol), KOH (123.5 mg, 2.20 mmol) and 5 mL THF/CH<sub>3</sub>OH/H<sub>2</sub>O (2:2:1) solvent mixture. The vial was sealed and the reaction was irradiated (200W) in the microwave reactor at 150 °C for 2 h. The reaction mixture was extracted with EtOAc (2 × 25). The combined organic layer was dried over Na<sub>2</sub>SO<sub>4</sub> and the solvent was evaporated under reduced pressure to give **10ac** as a brown solid (97mg, 70% yield). <sup>1</sup>H-NMR (400 MHz, DMSO-*d*<sub>6</sub>): δ= 11.40 (s, NH, 1H), 7.70 (d, *J* = 7.4 Hz, 2H), 7.39 (d, *J* = 7.2 Hz, 2H), 7.30-7.13 (m, 6H), 5.96 (d, *J* = 3.9 Hz, 1H), 5.28 (bs, 1H). <sup>13</sup>C-NMR (100 MHz, DMSO-*d*<sub>6</sub>): δ= 142.4, 132.1, 127.27, 126.8, 126.2, 123.2, 122.6, 115.7, 69.8. HRMS (Q-TOF): *m/z* [M + Na]<sup>+</sup> calcd. for C<sub>17</sub>H<sub>14</sub>NO: 270.0895, found: 270.0900.

**1,3-Di(pyridin-2-yl)-2,8-dihydrodibenzo[3,4:6,7]cyclohepta[1,2-*c*]pyrrol-8-yl acetate (10ba)**

The reaction was performed according to the general procedure C with **4b** (500 mg, 1.21 mmol) and Zinc dust (1.59 g, 24.25 mmol) at 118 °C for 2 h. The product was crystallized from MeOH/diethyl ether (9:1) to give **10ba** as a yellow crystal (409 mg, 76% yield). mp = 254-255 °C. <sup>1</sup>H-NMR (400 MHz, CDCl<sub>3</sub>): δ= 10.68 (bs, NH, 1H), 8.56 (bd, *J* = 4.7 Hz, 2H), 7.53 (d, *J* = 7.8 Hz, 2H), 7.47 (d, *J* = 8.1 Hz, 2H), 7.38 (dt, *J* = 7.6 Hz, *J* = 1.7 Hz, 2H), 7.43 (d, *J* = 7.6 Hz, 2H), 7.23 (dt, *J* = 7.6 Hz, *J* = 1.0 Hz, 2H), 7.08-6.99 (m, 4H), 6.77 (s, 1H), 2.34 (s, 3H). <sup>13</sup>C-NMR (100 MHz, CDCl<sub>3</sub>): δ=169.6, 150.4, 149.5, 139.8, 135.9, 130.1, 129.6, 128.4, 127.4, 126.5, 122.6, 121.4, 121.2, 121.1, 72.4, 21.3. HRMS (Q-TOF): *m/z* [M + H]<sup>+</sup> calcd. for C<sub>29</sub>H<sub>22</sub>N<sub>3</sub>O<sub>2</sub>: 444.1712, found: 444.1702.

### **1,3-Di(pyridin-2-yl)-2,8-dihydrodibenzo[3,4:6,7]cyclohepta[1,2-c]pyrrol-8-ol (10bb)**

To a solution of **10ba** (500 mg, 1.13 mmol) in 10 mL of H<sub>2</sub>O/EtOH (1:3) was added KOH (94.88 mg, 1.69 mmol) and stirred at room temperature for 4h. The reaction mixture was extracted with EtOAc (2 × 25). The combined organic layer was dried over Na<sub>2</sub>SO<sub>4</sub> and evaporated under vacuo. The product was purified by column chromatography (SiO<sub>2</sub>, EtOAc/*n*-Hexane (4:6) and recrystallization from CH<sub>2</sub>Cl<sub>2</sub>/*n*-hexane (9:1) to give **10bb** as a yellow crystal (363 mg, 80% yield). mp = 273-274 °C. <sup>1</sup>H-NMR (400 MHz, CDCl<sub>3</sub>): δ= 10.76 (bs, NH, 1H), 8.62 (d, *J* = 4.6 Hz, 2H), 7.81 (d, *J* = 7.8 Hz, 2H), 7.56 (d, *J* = 8.1 Hz, 2H), 7.50-7.30 (m, 4H), 7.34 (t, *J* = 7.6 Hz, 2H), 7.15-7.06 (m, 4H), 5.90 (s, 1H), 2.51 (s, 1H). <sup>13</sup>C-NMR (100 MHz, CDCl<sub>3</sub>): δ=150.6, 149.6, 143.3, 136.0, 129.9, 129.4, 128.1, 127.5, 126.2, 123.2, 121.4(2C), 121.0, 70.7. HRMS (Q-TOF): *m/z* [M + H]<sup>+</sup> calcd. for C<sub>27</sub>H<sub>20</sub>N<sub>3</sub>O: 402.1606, found: 402.1605.

### **1,3-Di(pyridin-2-yl)dibenzo[3,4:6,7]cyclohepta[1,2-c]pyrrol-8(2H)-one (10bc)**

To a solution of **10bb** (500 mg, 1.25 mmol) in 10 mL of CH<sub>2</sub>Cl<sub>2</sub> was added MnO<sub>2</sub> (1.08 g, 12.45 mmol) and stirred at room temperature for 3h. The solvent was evaporated under reduced pressure and the reaction mixture was filtered through Celite. The product was crystallized from MeOH/diethyl ether (9:1) to give **10ba** as a yellow crystal (388 mg, 78% yield). mp = 244-245 °C. <sup>1</sup>H-NMR (400 MHz, CDCl<sub>3</sub>): δ= 10.50 (bs, NH, 1H), 8.64 (d, *J* = 4.6 Hz, 2H), 7.69 (d, *J* = 7.3 Hz, 2H), 7.63 (d, *J* = 7.5 Hz, 2H), 7.47 (t, *J* = 7.8 Hz, 2H), 7.41-7.30 (m, 6H), 7.15-7.09 (m, 2H). <sup>13</sup>C-NMR (100 MHz, CDCl<sub>3</sub>): δ= 200.8, 150.6, 149.7, 142.5, 135.9, 131.4, 130.4, 130.1, 130.0, 127.4, 127.3, 121.7, 121.4, 121.2. HRMS (Q-TOF): *m/z* [M + H]<sup>+</sup> calcd. for C<sub>27</sub>H<sub>18</sub>N<sub>3</sub>O: 400.1450, found: 400.1440.

### **Dimethyl 9-(4-hydroxyphenyl)-9H-dibenzo[3,4:6,7]cyclohepta[1,2-d]pyridazine-1,4-dicarboxylate (13a)**

The reaction was performed according to the general procedure A with **11** (500 mg, 1.77 mmol) and DET **2a** (351 mg, 1.77 mmol) in 5 mL toluene at 80 °C for overnight.

The product was purified by column chromatography (SiO<sub>2</sub>, *n*-hexane/EtOAc (1,5:8,5) to give **13a** as a white solid (697 mg, 95% yield). mp = 270-271 °C. <sup>1</sup>H-NMR (400 MHz, CDCl<sub>3</sub>): δ= 7.55-7.47 (m, 4H), 7.38 (d, *J* = 7.5 Hz, 2H), 7.32 (t, *J* = 7.4 Hz, 2H), 6.68 (d, *J* = 8.5 Hz, 2H), 6.41 (d, *J* = 8.5 Hz, 2H), 5.37 (s, 1H), 4.92 (s, 1H), 3.85 (s, 6H). <sup>13</sup>C-NMR (100 MHz, CDCl<sub>3</sub>): δ= 166.0, 154.0, 152.7, 147.5, 135.3, 130.9, 130.8, 130.1, 129.5, 129.3, 128.8, 127.0, 114.5, 56.3, 53.0. HRMS (Q-TOF): *m/z* [M + H]<sup>+</sup> calcd. for C<sub>27</sub>H<sub>21</sub>N<sub>2</sub>O<sub>5</sub>: 453.1450, found: 453.1448.

#### **4-(1,4-Di(pyridin-2-yl)-9*H*-dibenzo[3,4:6,7]cyclohepta[1,2-*d*]pyridazin-9-yl)phenol (13b)**

The reaction was performed according to the general procedure A with **11** (500 mg, 1.77 mmol) and DPT **2b** (841 mg, 1.77 mmol) in 5 mL toluene at 80 °C for 3 day. The mixture was cooled to room temperature and the precipitated product was filtrated, washed with Et<sub>2</sub>O to give **13b** as a white solid (808 mg, 93% yield). mp > 300 °C. <sup>1</sup>H-NMR (400 MHz, CDCl<sub>3</sub>): δ= 8.61 (d, *J* = 4.6 Hz, 2H), 7.82 (t, *J* = 7.8 Hz, 2H), 7.55 (d, *J* = 7.5 Hz, 2H), 7.46-7.39 (m, 2H), 7.37 (d, *J* = 7.8 Hz, 2H), 7.32 (t, *J* = 7.5 Hz, 2H), 7.22 (d, *J* = 8.4 Hz, 2H), 6.88 (t, *J* = 7.6 Hz, 2H), 6.83 (d, *J* = 7.6 Hz, 2H), 6.52 (d, *J* = 8.4 Hz, 2H), 5.53 (s, 1H). <sup>13</sup>C-NMR (100 MHz, CDCl<sub>3</sub>): δ= 158.6, 157.5, 156.8, 150.2, 149.5, 138.1, 138.0, 133.7, 132.1, 131.3, 130.8, 130.6, 130.4, 126.8, 126.2, 124.9, 115.5, 57.9. HRMS (Q-TOF): *m/z* [M + H]<sup>+</sup> calcd. for C<sub>33</sub>H<sub>23</sub>N<sub>4</sub>O: 491.1872, found: 491.1872.

#### **Dimethyl 9-(4-oxocyclohexa-2,5-dien-1-ylidene)-9*H*-dibenzo[3,4:6,7]cyclohepta[1,2-*d*]pyridazine-1,4-dicarboxylate (14a)**

The reaction was performed according to the general procedure B with **13a** (500 mg, 1.11 mmol) and PIFA (570 mg, 1.33 mmol) at room temperature for overnight. The product was purified by gradial chromatography (Al<sub>2</sub>O<sub>3</sub>, *n*-hexane then CH<sub>2</sub>Cl<sub>2</sub>/EtOAc (9:1)) and recrystallization from CH<sub>2</sub>Cl<sub>2</sub>/*n*-hexane (9:1) to give **14a** as a yellow crystal (453 mg, 90% yield). mp = 253-254 °C. <sup>1</sup>H-NMR (400 MHz, CDCl<sub>3</sub>): δ= 7.59 (t, *J* = 7.5 Hz, 2H), 7.54 (d, *J* = 7.7 Hz, 2H), 7.47 (t, *J* = 7.7 Hz, 2H), 7.42-7.35 (m, 4H), 6.43 (d, *J* = 10.0 Hz, 2H), 3.89 (s, 6H). <sup>13</sup>C-NMR (100 MHz, CDCl<sub>3</sub>): δ= 186.8, 165.9, 154.2, 151.6, 143.2, 136.4, 134.7, 130.8, 130.5, 129.7, 129.2, 129.2, 128.8, 128.0, 77.5, 77.2, 76.8, 53.5. HRMS (Q-TOF): *m/z* [M + H]<sup>+</sup> calcd. for C<sub>27</sub>H<sub>19</sub>N<sub>2</sub>O<sub>5</sub>: 451.1294, found: 451.1283.

#### **4-(1,4-Di(pyridin-2-yl)-9*H*-dibenzo[3,4:6,7]cyclohepta[1,2-*d*]pyridazin-9-ylidene)cyclohexa-2,5-dien-1-one (14b)**

The reaction was performed according to the general procedure B with **13b** (500 mg, 1.02 mmol) and PIFA (526 mg, 1.22 mmol) at room temperature for overnight. The product was purified by gradial chromatography (Al<sub>2</sub>O<sub>3</sub>, *n*-hexane then EtOAc/MeOH (9:1)) and recrystallization from then MeOH/diethyl ether (9:1) to give **14b** as a yellow

crystal (433 mg, 87% yield). mp = 272-273 °C. <sup>1</sup>H-NMR (400 MHz, CDCl<sub>3</sub>): δ= 8.48 (d, *J* = 4.7 Hz, 2H), 7.79-7.74 (m, 4H), 7.64 (d, *J* = 10.1 Hz, 2H), 7.35-7.23 (m, 6H), 7.01-6.95 (m, 2H), 6.92 (d, *J* = 7.6 Hz, 2H), 6.51 (d, *J* = 10.1 Hz, 2H). <sup>13</sup>C-NMR (100 MHz, CDCl<sub>3</sub>): δ= 187.0, 158.3, 156.3, 154.5, 149.3, 143.7(2C), 137.1, 136.5, 135.0, 131.4, 130.9, 130.10, 128.8, 127.3, 126.9, 124.9, 123.2. HRMS (Q-TOF): *m/z* [M + H]<sup>+</sup> calcd. for C<sub>33</sub>H<sub>21</sub>N<sub>4</sub>O: 489.1715, found: 489.1700.

**Dimethyl 8-(4-hydroxyphenyl)-2,8-dihydrodibenzo[3,4:6,7] cyclohepta[1,2-c]pyrrole-1,3-dicarboxylate (15a)**

The reaction was performed according to the general procedure C with **13a** (500 mg, 1.1 mmol) and Zinc dust (722 mg, 11.1 mmol) at room temperature for overnight. The product was crystallized from MeOH/diethyl ether (9:1) to give **15a** as a white crystal (301 mg, 62% yield). mp = 302-303 °C. <sup>1</sup>H-NMR (400 MHz, Acetone-d<sub>6</sub>): δ= 10.86 (s, NH, 1H), 7.82 (s, OH, 1H), 7.63 (d, *J* = 7.5 Hz, 2H), 7.54 (d, *J* = 7.5 Hz, 2H), 7.35 (t, *J* = 7.5 Hz, 2H), 7.25 (t, *J* = 7.5 Hz, 2H), 6.55 (d, *J* = 8.5 Hz, 2H), 6.36 (d, *J* = 8.5 Hz, 2H), 5.33 (s, 1H), 3.74 (s, 6H). <sup>13</sup>C-NMR (100 MHz, Acetone-d<sub>6</sub>): δ= 161.1, 155.8, 144.9, 133.3, 133.0, 130.8, 130.5, 129.9, 128.8, 128.5, 126.6, 120.9, 114.7, 57.7, 51.7. HRMS (Q-TOF): *m/z* [M + H]<sup>+</sup> calcd. for C<sub>27</sub>H<sub>22</sub>NO<sub>5</sub>: 440.1498, found: 440.1490.

**4-(1,3-Di(pyridin-2-yl)-2,8-dihydrodibenzo[3,4:6,7]cyclohepta[1,2-c]pyrrol-8-yl)phenol (15b)**

The reaction was performed according to the general procedure C with **13b** (500 mg, 1.02 mmol) and Zinc dust (666 mg, 10.2 mmol) at room temperature for overnight. The product was crystallized from MeOH/diethyl ether (9:1) to give **15b** as a brown crystal (278 mg, 57% yield). mp = 303-304 °C. <sup>1</sup>H-NMR (400 MHz, CDCl<sub>3</sub>): δ= 10.15 (s, NH, 1H), 8.51 (d, *J* = 4.6 Hz, 2H), 7.52 (d, *J* = 7.5 Hz, 2H), 7.49 (d, *J* = 7.7 Hz, 2H), 7.43 (dt, *J* = 7.7 Hz, *J* = 1.2 Hz, 2H), 7.32 (d, *J* = 7.5 Hz, 2H), 7.31 (t, *J* = 7.1 Hz, 2H), 7.16 (t, *J* = 7.5 Hz, 2H), 7.07-6.97 (m, 2H), 6.82 (d, *J* = 8.5 Hz, 2H), 6.34 (d, *J* = 8.5 Hz, 2H), 5.32 (s, 1H). <sup>13</sup>C-NMR (100 MHz, CDCl<sub>3</sub>): δ= 153.1, 150.8, 149.3, 143.2, 135.7, 134.1, 131.9, 131.5, 130.0, 127.7, 127.6, 127.4, 126.6, 123.6, 121.0, 120.6, 114.1, 57.6. HRMS (Q-TOF): *m/z* [M + H]<sup>+</sup> calcd. for C<sub>33</sub>H<sub>24</sub>N<sub>3</sub>O: 478.1919, found: 478.1909.

**Dimethyl 8-(4-oxocyclohexa-2,5-dien-1-ylidene)-2,8-dihydrodibenzo[3,4:6,7]cyclohepta[1,2-c]pyrrole-1,3-dicarboxylate (16a)**

The reaction was performed according to the general procedure B with **15a** (500 mg, 1.02 mmol) and PIFA (526 mg, 1.22 mmol) at room temperature for overnight. The product was purified by gradial chromatography (Al<sub>2</sub>O<sub>3</sub>, *n*-hexane then CH<sub>2</sub>Cl<sub>2</sub>) and recrystallization from then CH<sub>2</sub>Cl<sub>2</sub>/*n*-hexane (9:1) to give **16a** as a yellow crystal (444 mg, 89% yield). mp = 303-304 °C. <sup>1</sup>H-NMR (400 MHz, CDCl<sub>3</sub>): δ= 9.98 (s, NH, 1H), 7.85-7.75 (m, 2H), 7.47 (d, *J* = 10.0 Hz, 2H), 7.44-7.36 (m, 4H), 7.29-7.23 (m, 2H), 6.37 (d, *J* = 10.0 Hz, 2H), 3.88 (s, 6H). <sup>13</sup>C-NMR (100 MHz, CDCl<sub>3</sub>): δ= 187.3, 160.4,

158.2, 139.8, 137.8, 131.8, 129.4, 129.0, 128.9, 128.8, 128.2, 127.7, 127.4, 120.7, 52.2. HRMS (Q-TOF):  $m/z$   $[M + H]^+$  calcd. for  $C_{27}H_{20}NO_5$ : 438.1341, found: 438.1331.

**4-(1,3-Di(pyridin-2-yl)dibenzo[3,4:6,7]cyclohepta[1,2-*c*]pyrrol-8(2*H*)-ylidene)cyclohexa-2,5-dien-1-one (16b)**

DDQ (238 mg, 1.05 mmol) and **15b** (500 mg, 1.05 mmol) were dissolved in 20 mL  $CH_2Cl_2$  and stirred at room temperature for 30 min. The reaction mixture was washed with 20 mL of 5%  $NaHCO_3$  solution and  $H_2O$  (2x20 mL). The organic phase was dried over  $Na_2SO_4$  and the solvent was evaporated under reduced pressure to give **16b** as a yellow solid (483 mg, 97% yield). mp > 300 °C.  $^1H$ -NMR (400 MHz,  $CDCl_3$ ):  $\delta$  = 10.60 (s, NH, 1H), 8.62 (d,  $J$  = 4.7 Hz, 2H), 7.66–7.58 (m, 4H), 7.50 (dt,  $J$  = 7.8 Hz,  $J$  = 1.7 Hz, 2H), 7.43 (d,  $J$  = 8.0 Hz, 2H), 7.40–7.31 (m, 4H), 7.31–7.24 (m, 2H), 7.11 (dd,  $J$  = 6.4 Hz,  $J$  = 5.5 Hz, 2H), 6.43 (d,  $J$  = 10.1 Hz, 2H).  $^{13}C$ -NMR (100 MHz,  $CDCl_3$ ):  $\delta$  = 187.3, 159.8, 150.5, 149.8, 139.3, 137.8, 136.0, 131.8, 130.7, 129.4, 129.2, 128.5, 128.4, 128.3, 127.2, 122.4, 121.7, 121.1. HRMS (Q-TOF):  $m/z$   $[M + H]^+$  calcd. for  $C_{33}H_{22}N_3O$ : 476.1763, found: 476.1750.

**Table 1.** Some photophysical properties of cycloadducts **3c-3f** and **3k**.

| Compound  | $\lambda_{ems}/nm$ ( $\lambda_{exc}/nm$ ) | $\lambda_{abs}/nm$ | Stokes shift (nm) | Quantum yields ( $\Phi_F$ ) | $\epsilon$ ( $M^{-1}.cm^{-1}$ ) |
|-----------|-------------------------------------------|--------------------|-------------------|-----------------------------|---------------------------------|
| <b>3c</b> | 534 (400)                                 | 427                | 107               | 0.78                        | 5867                            |
| <b>3d</b> | 539 (375)                                 | 408                | 131               | 0.60                        | 4987                            |
| <b>3e</b> | 515 (360)                                 | 393                | 122               | 0.53                        | 3749                            |
| <b>3f</b> | 487 (350)                                 | 378                | 109               | 0.28                        | 6044                            |
| <b>3k</b> | 503 (350)                                 | 378                | 125               | 0.16                        | 5261                            |

**$^1\text{H}$  NMR,  $^{13}\text{C}$  NMR, and HRMS Spectra:**

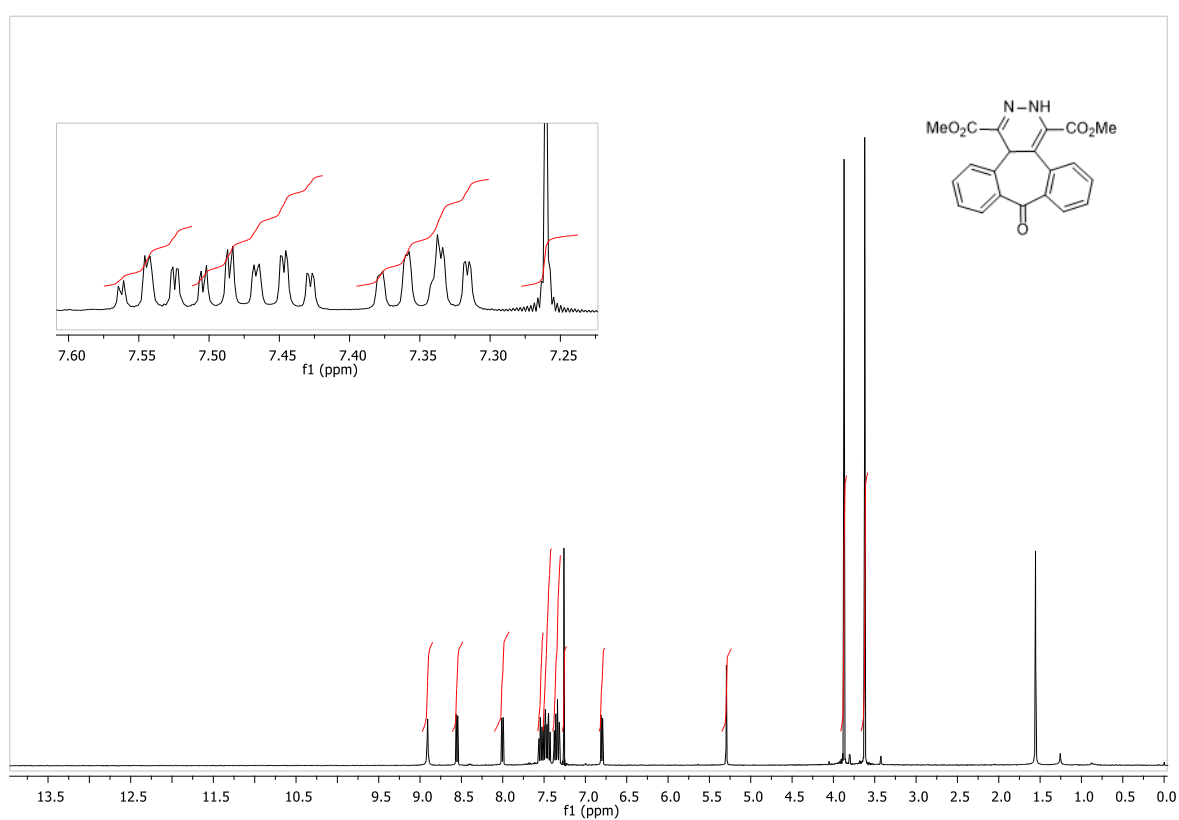

**Fig. S1.**  $^1\text{H}$ -NMR spectrum of **3a** (400 MHz,  $\text{CDCl}_3$ ).

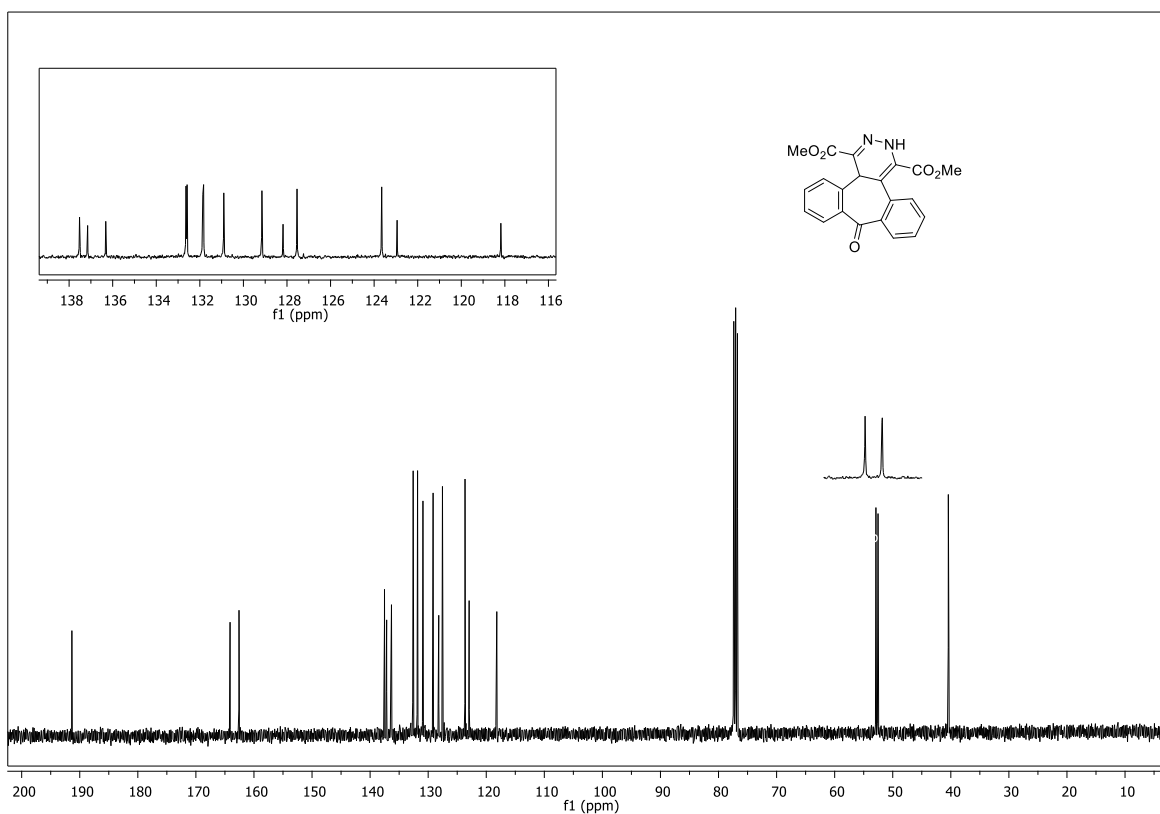

**Fig. S2.**  $^{13}\text{C}$ -NMR spectrum of **3a** (100 MHz,  $\text{CDCl}_3$ ).

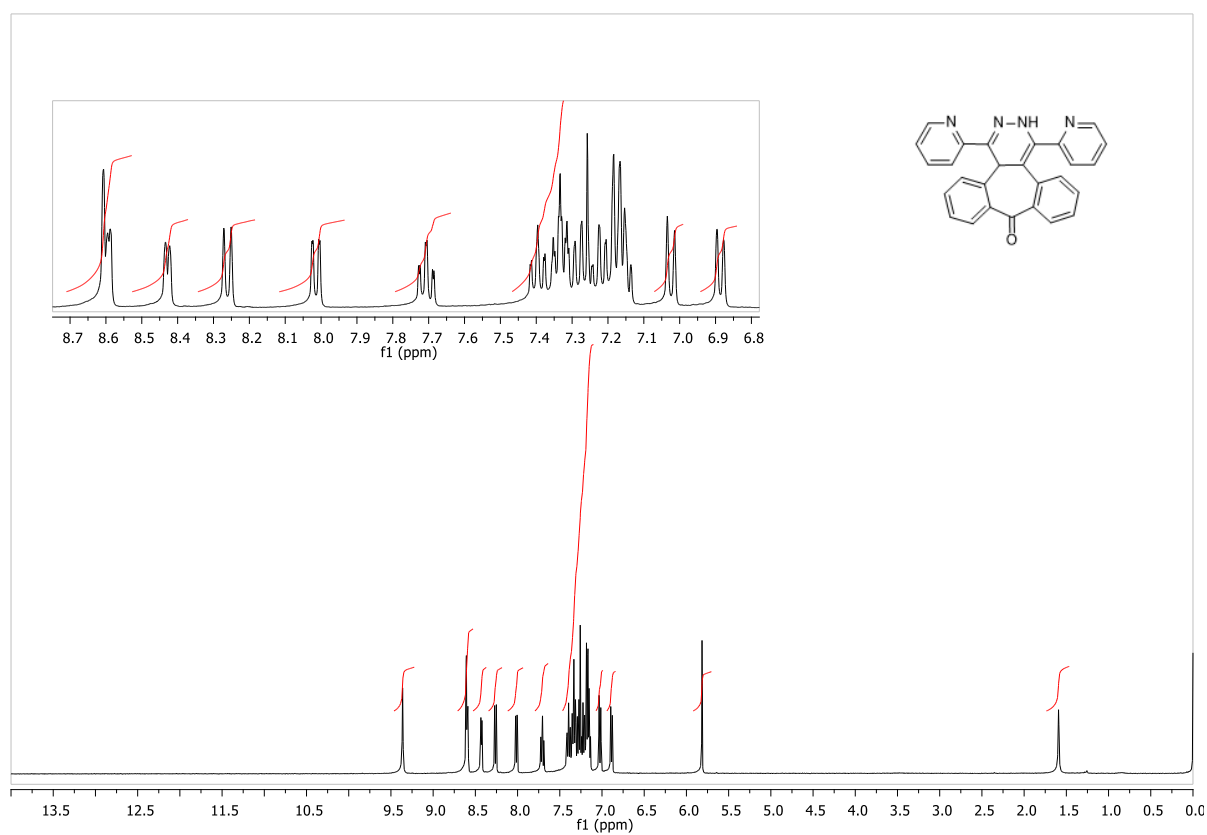

**Fig. S3.**  $^1\text{H}$ -NMR spectrum of **3b** (400 MHz,  $\text{CDCl}_3$ ).

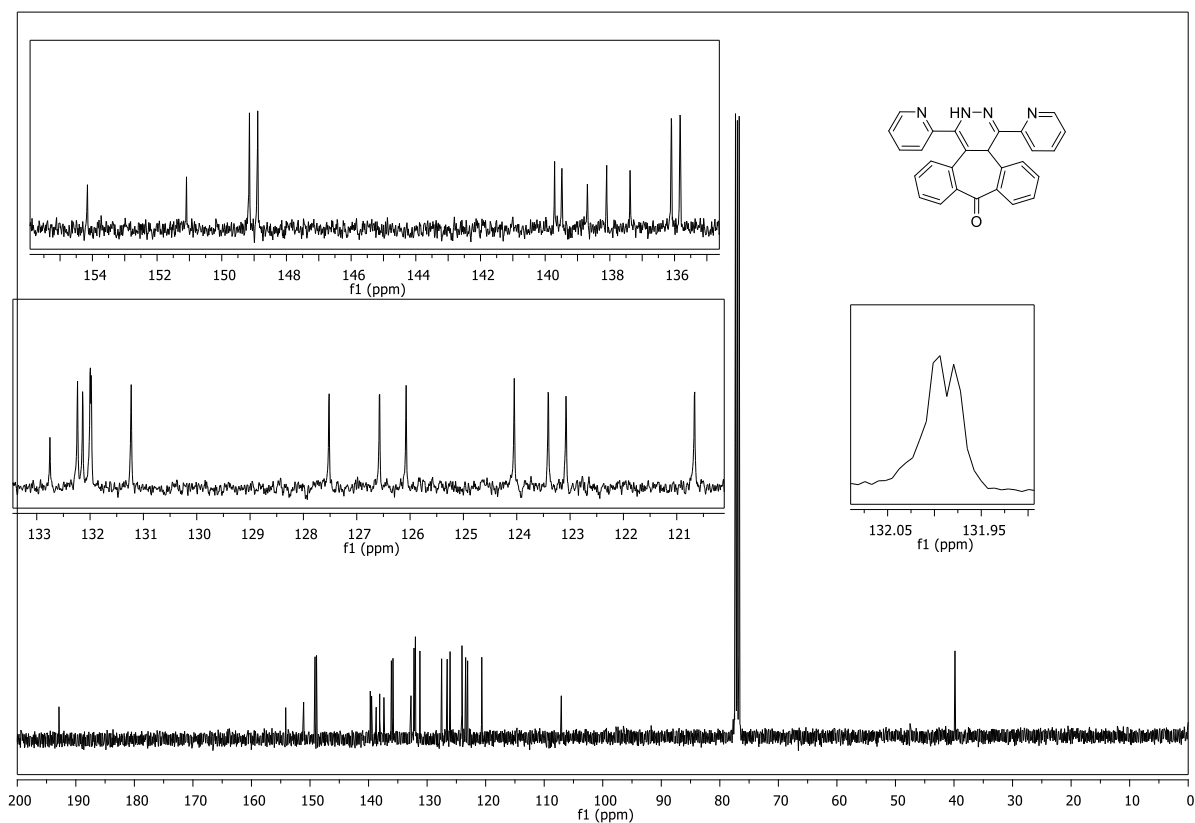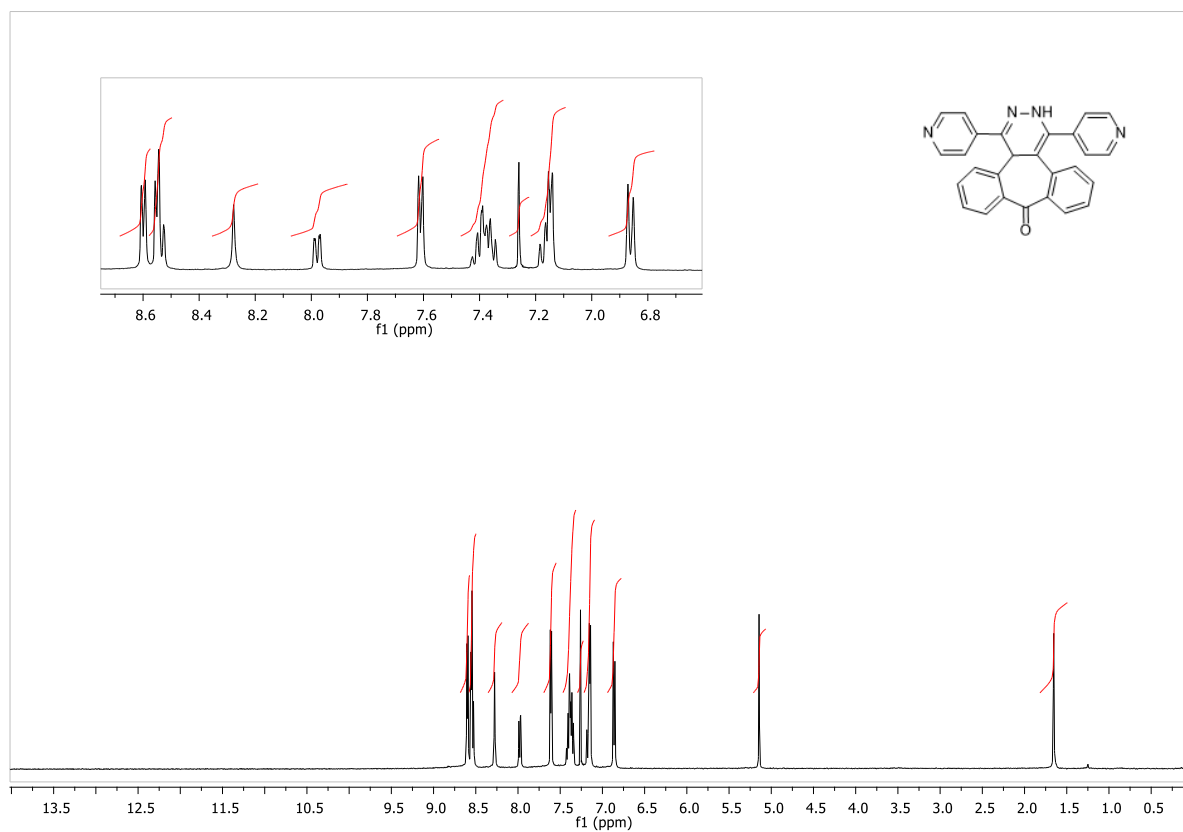

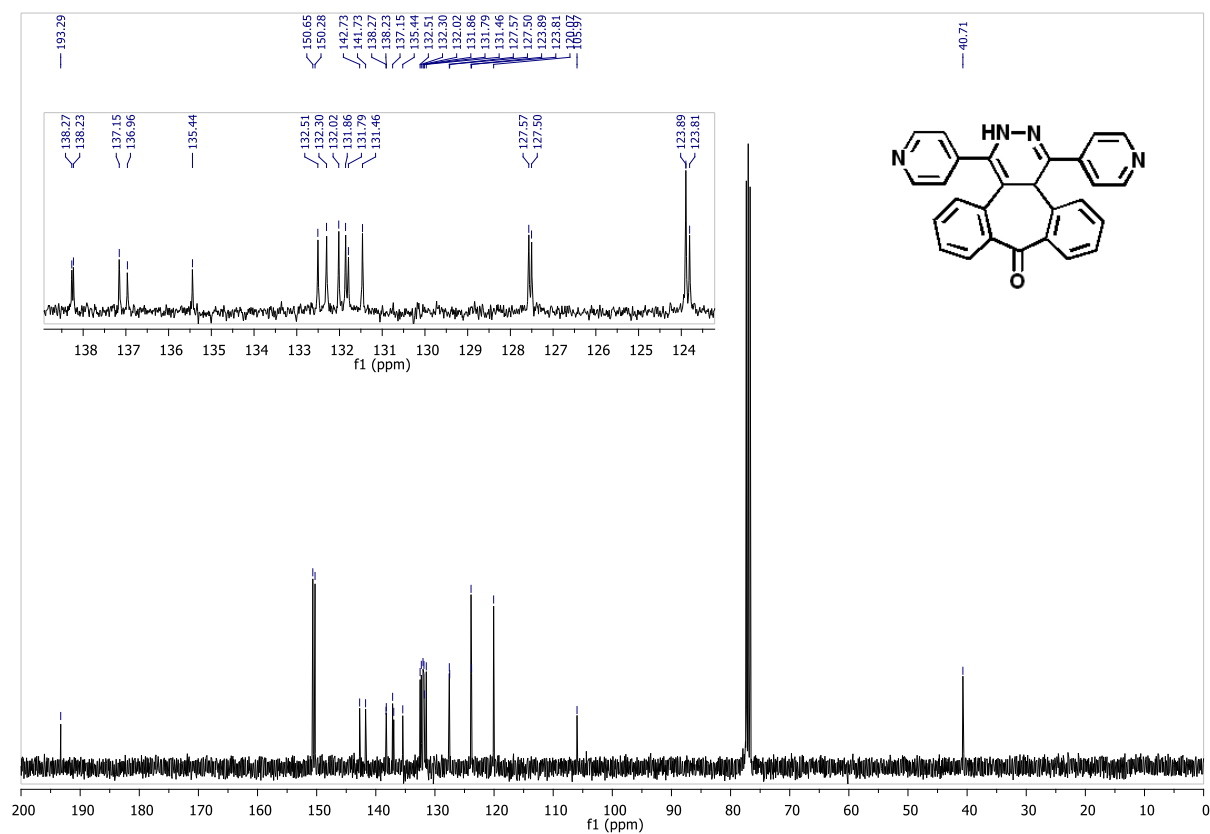

**Fig. S6.** <sup>13</sup>C-NMR spectrum of **3c** (100 MHz, CDCl<sub>3</sub>).

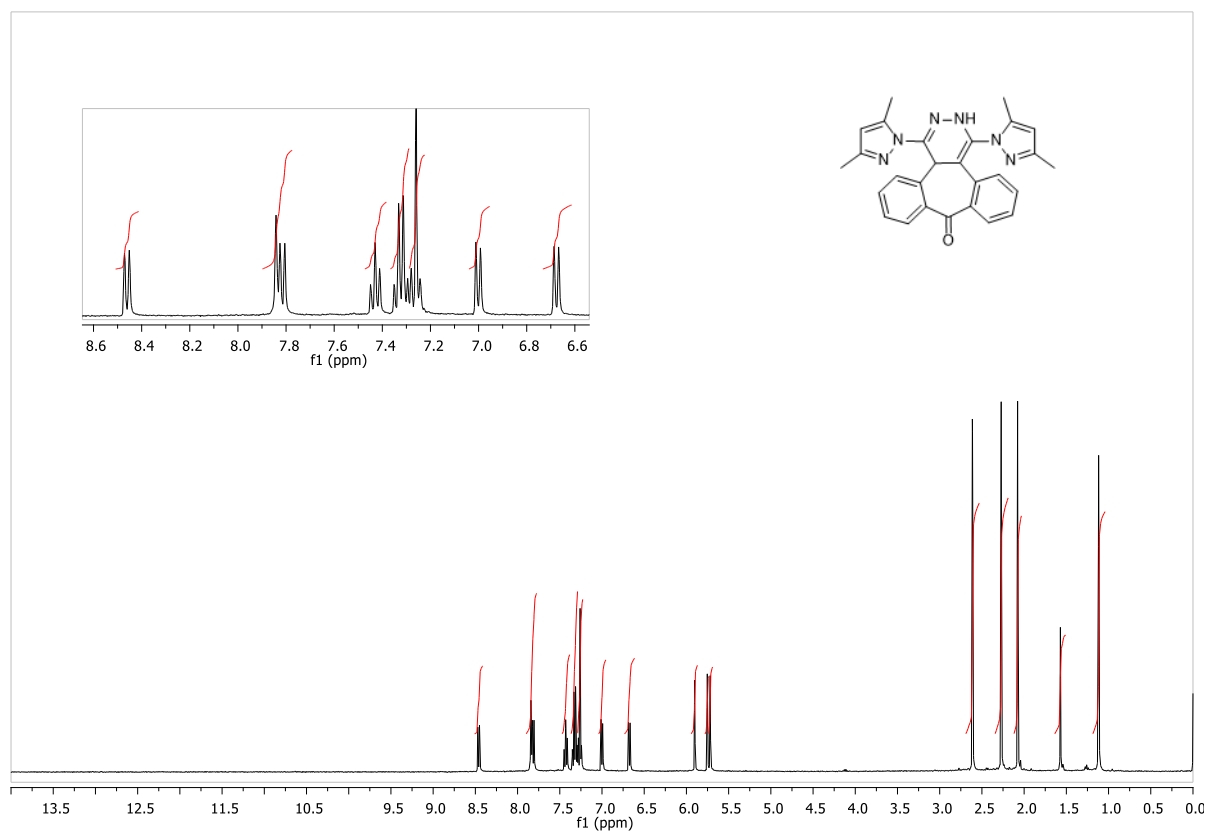

**Fig. S7.** <sup>1</sup>H-NMR spectrum of **3d** (400 MHz, CDCl<sub>3</sub>).

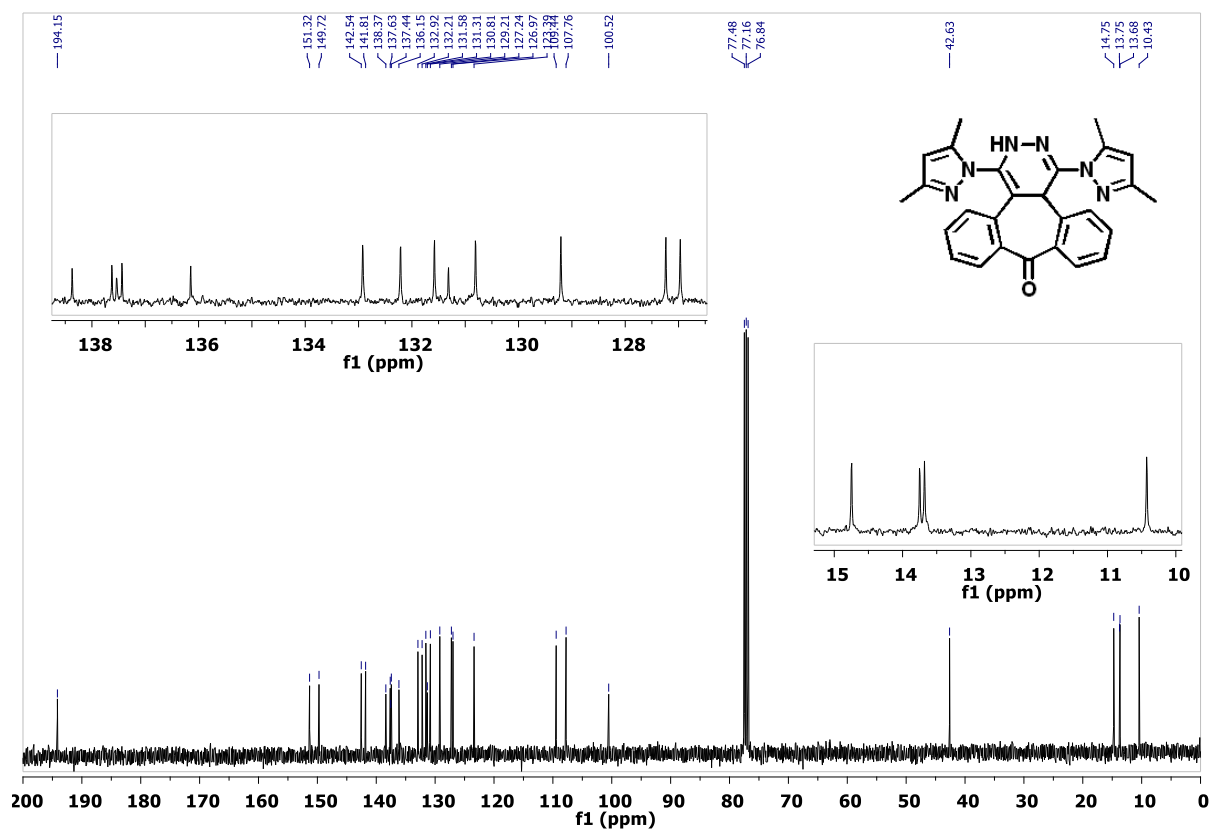

**Fig. S8.** <sup>13</sup>C-NMR spectrum of **3d** (100 MHz, CDCl<sub>3</sub>).

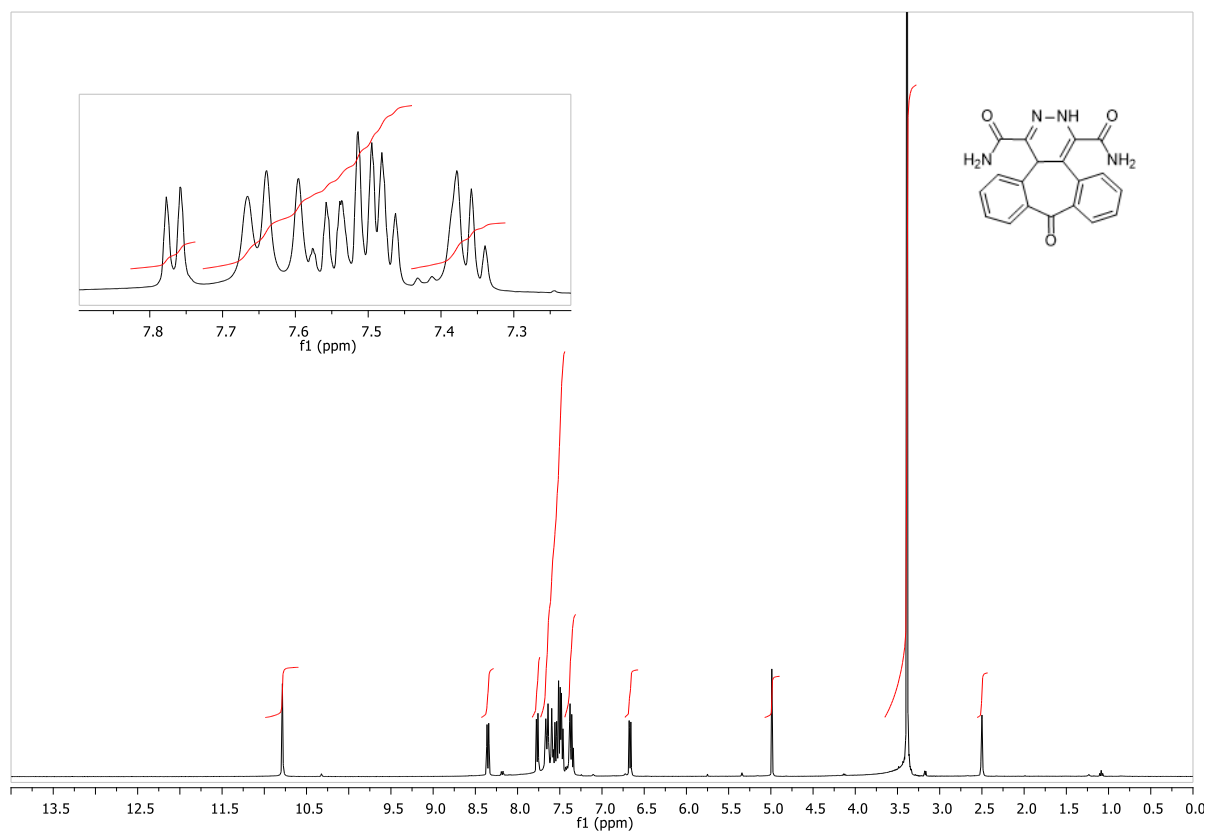

**Fig. S9.** <sup>1</sup>H-NMR spectrum of **3e** (400 MHz, DMSO-*d*<sub>6</sub>).

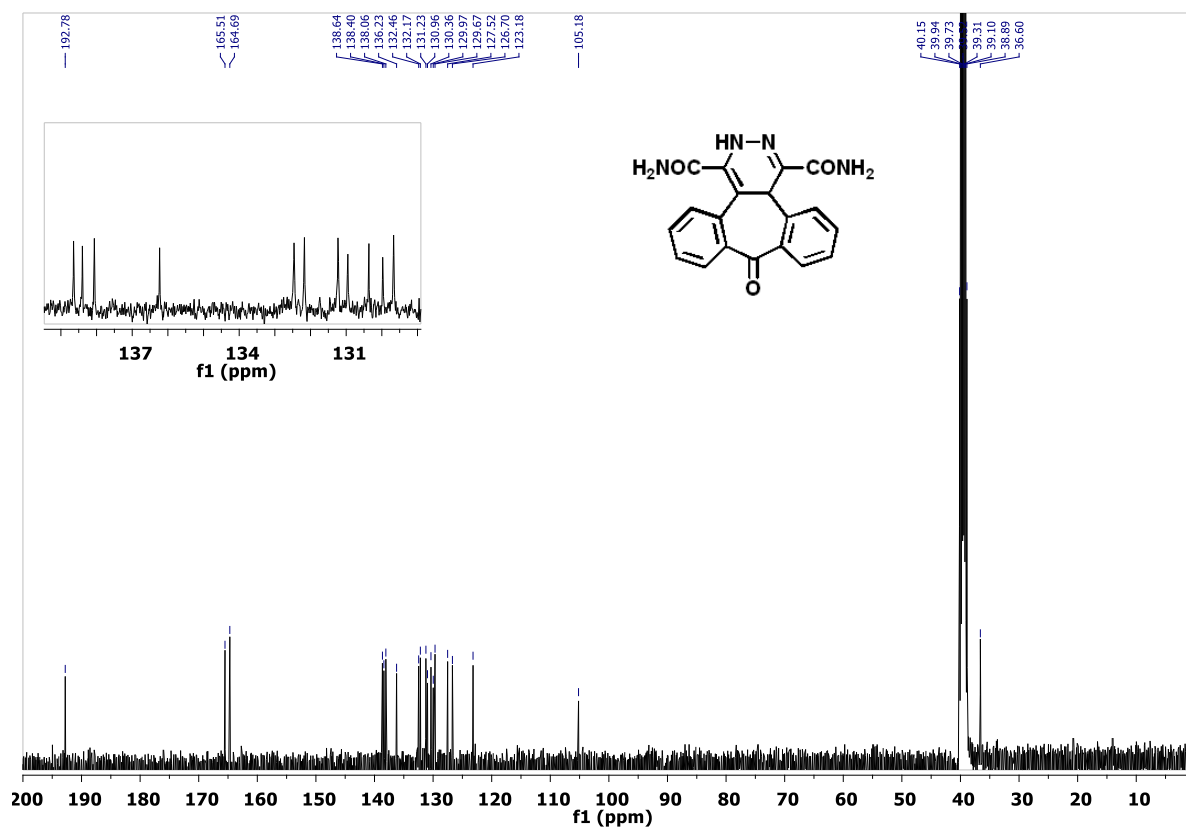

**Fig. S10.** <sup>13</sup>C-NMR spectrum of **3e** (100 MHz, DMSO-*d*<sub>6</sub>).

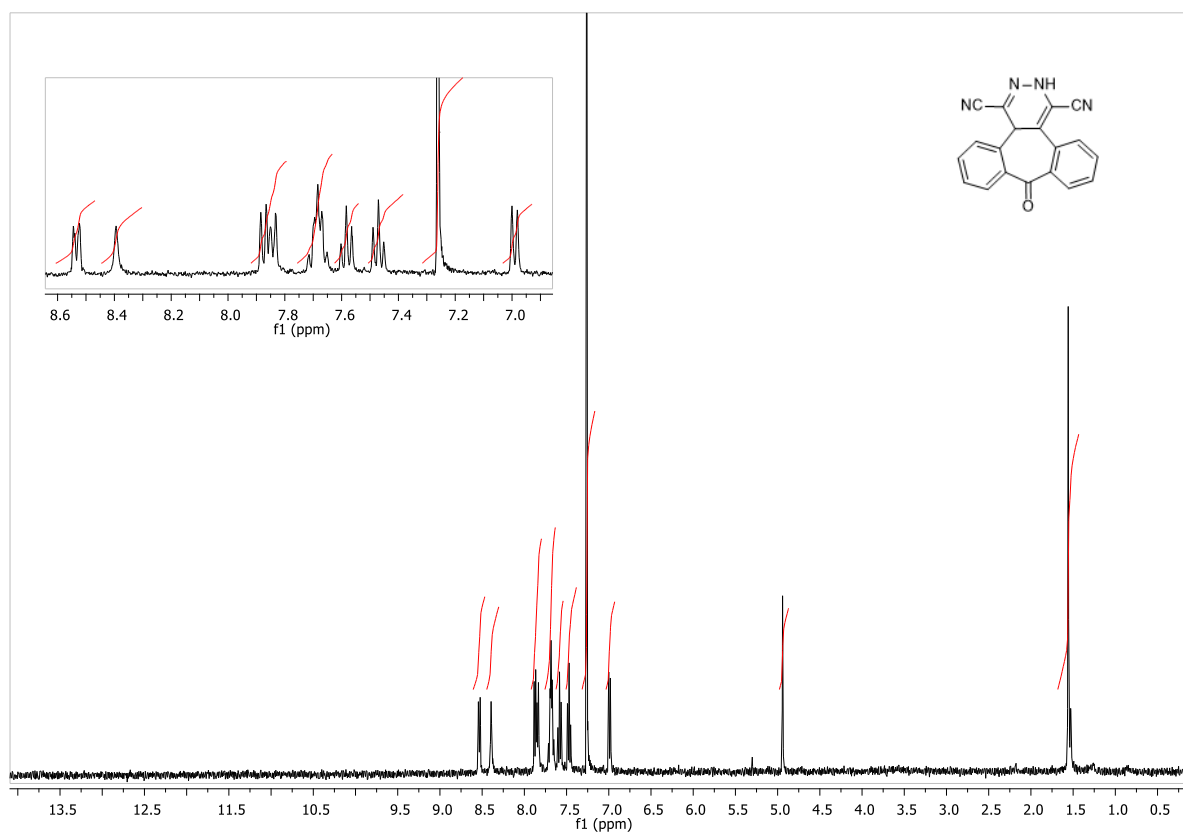

**Fig. S11.** <sup>1</sup>H-NMR spectrum of **3f** (400 MHz, CDCl<sub>3</sub>).

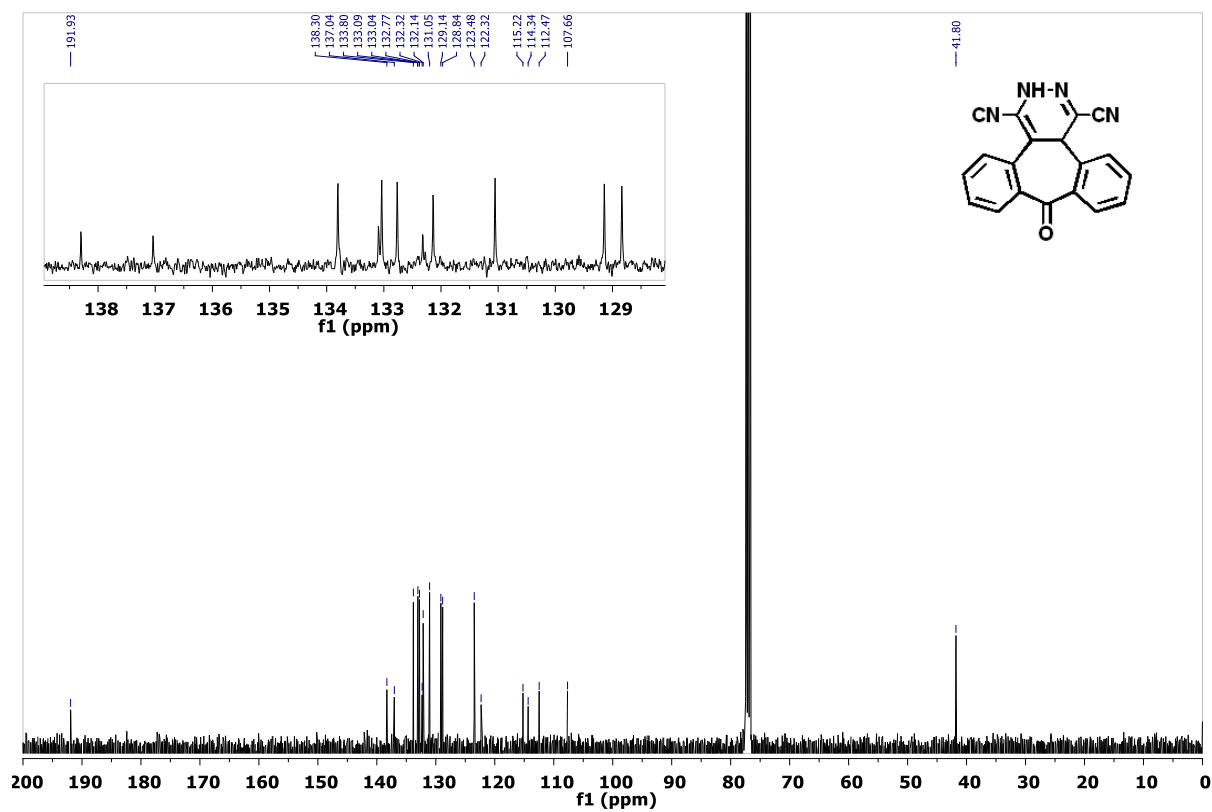

**Fig. S12.** <sup>13</sup>C-NMR spectrum of **3f** (100 MHz, CDCl<sub>3</sub>).

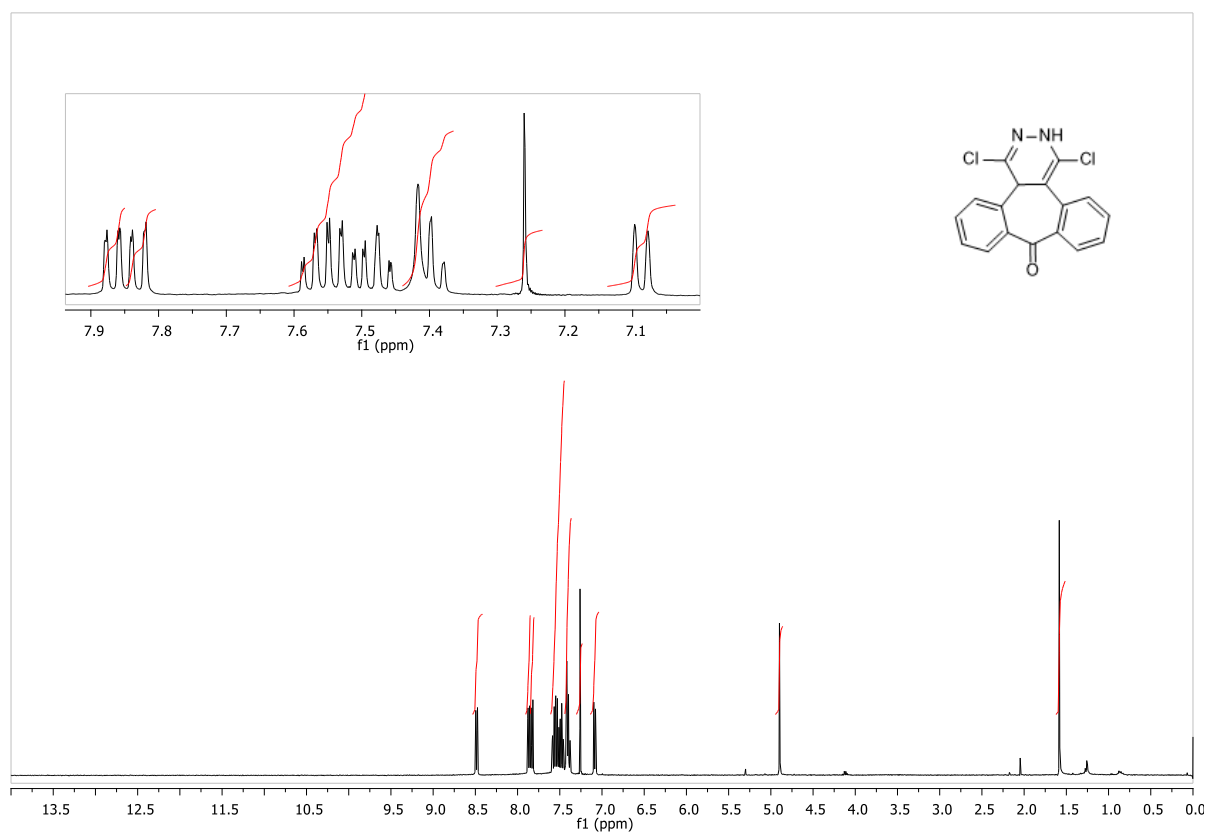

**Fig. S13.** <sup>1</sup>H-NMR spectrum of **3k** (400 MHz, CDCl<sub>3</sub>).

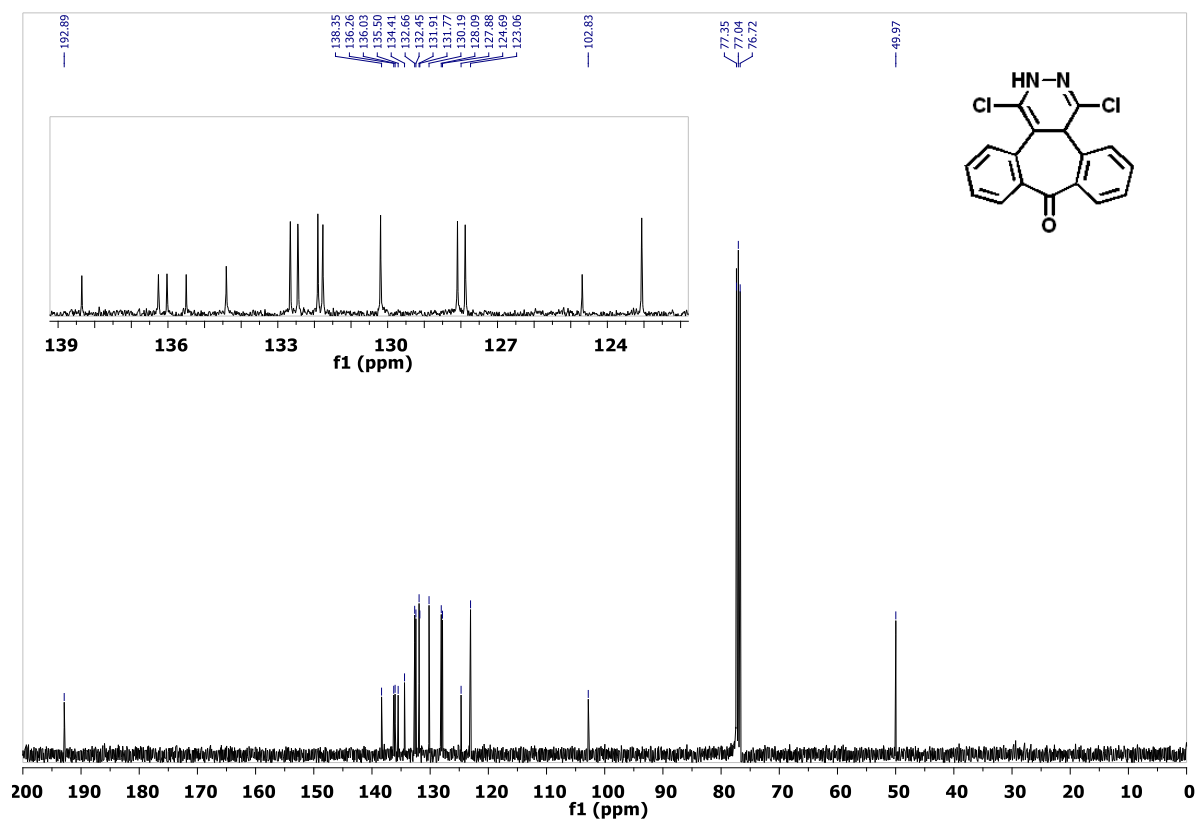

**Fig. S14.** <sup>13</sup>C-NMR spectrum of **3k** (100 MHz, CDCl<sub>3</sub>).

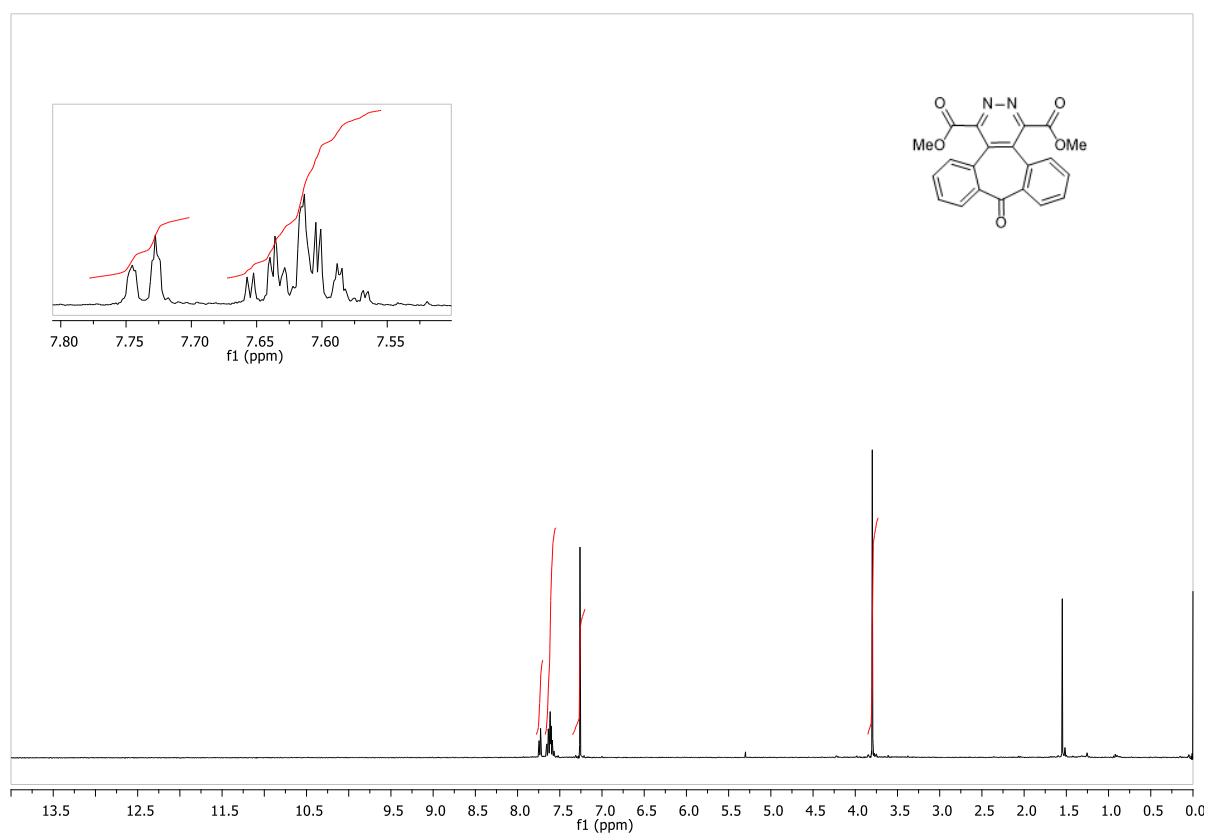

**Fig. S15.** <sup>1</sup>H-NMR spectrum of **4a** (400 MHz, CDCl<sub>3</sub>).

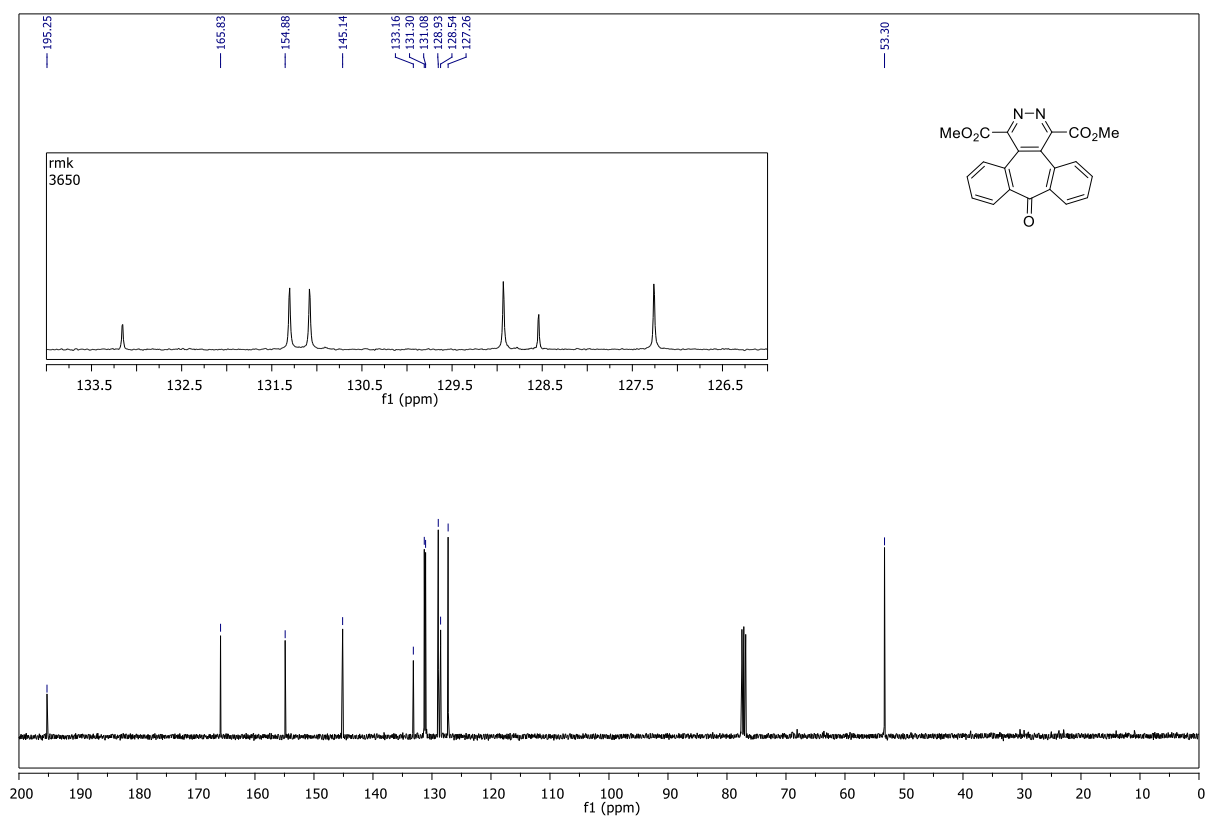

**Fig. S16.** <sup>13</sup>C-NMR spectrum of **4a** (100 MHz, CDCl<sub>3</sub>).

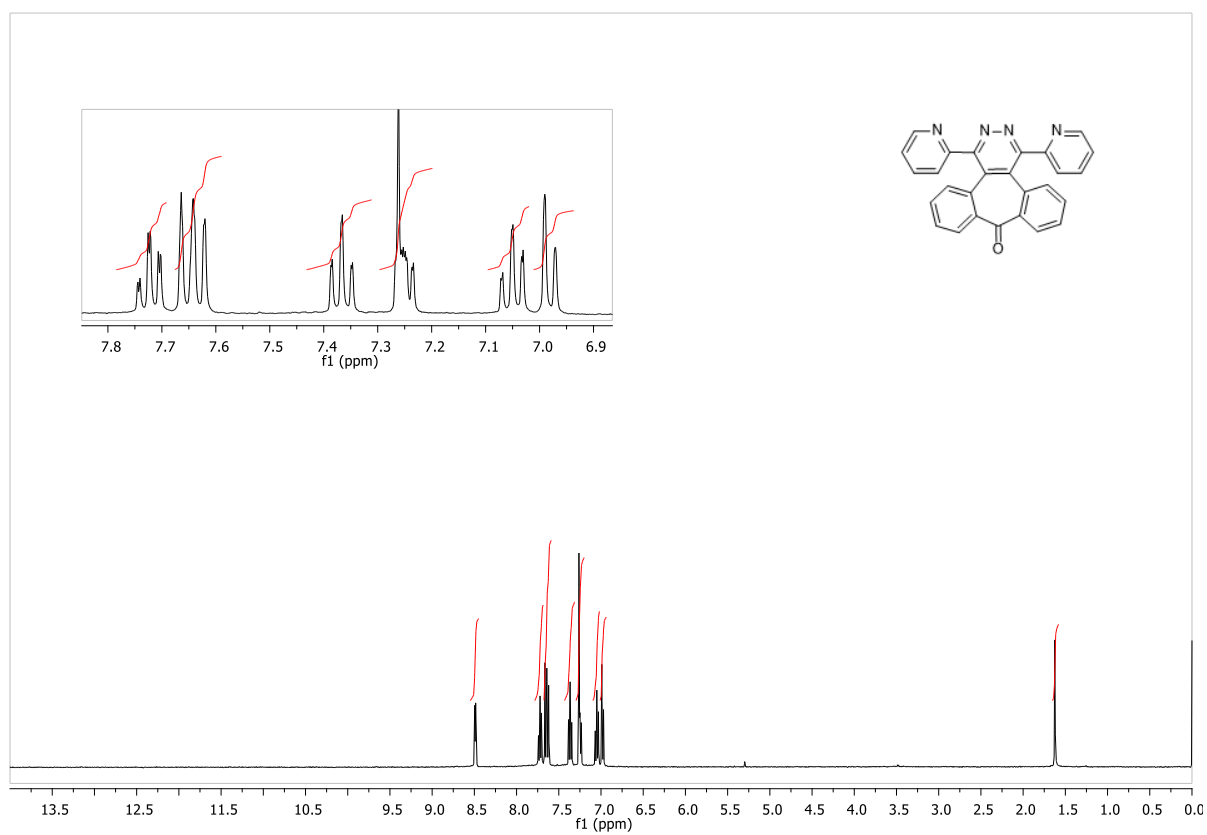

**Fig. S17.** <sup>1</sup>H-NMR spectrum of **4b** (400 MHz, CDCl<sub>3</sub>).

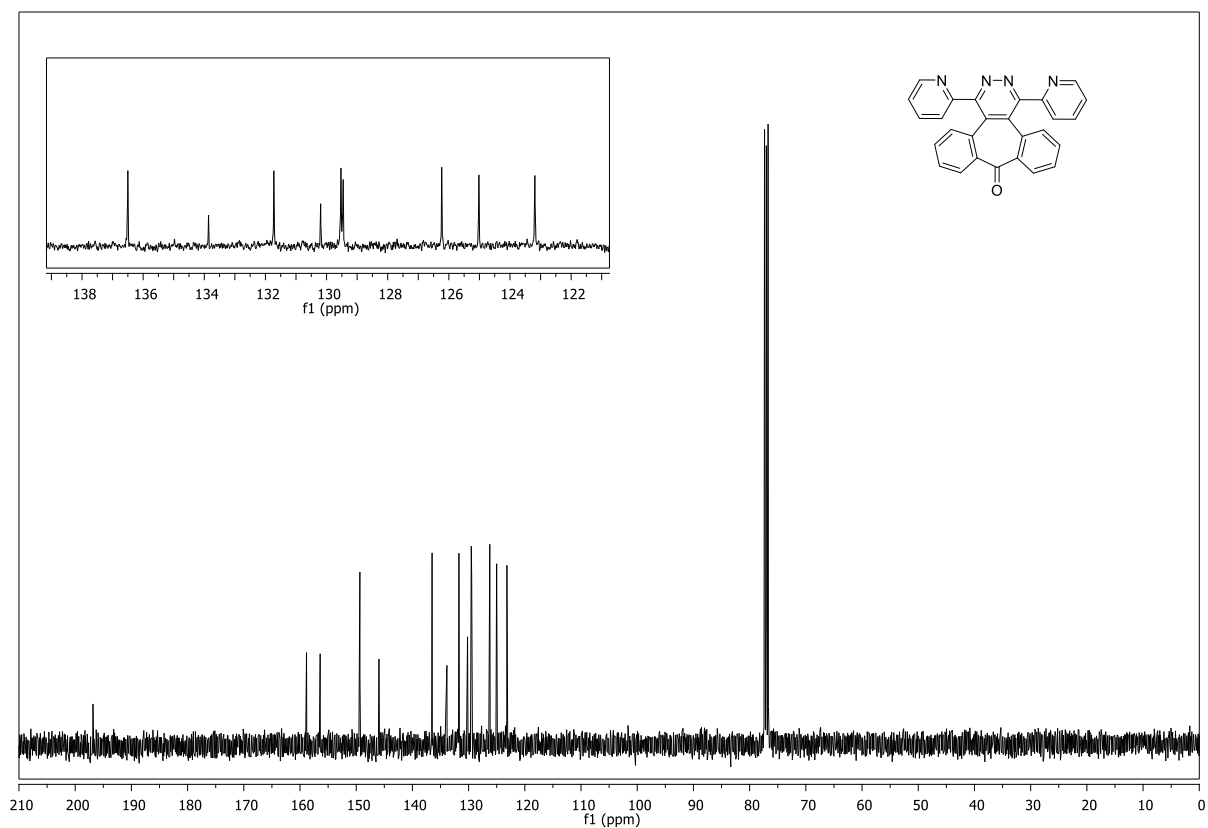

**Fig. S18.**  $^{13}\text{C}$ -NMR spectrum of **4b** (100 MHz,  $\text{CDCl}_3$ ).

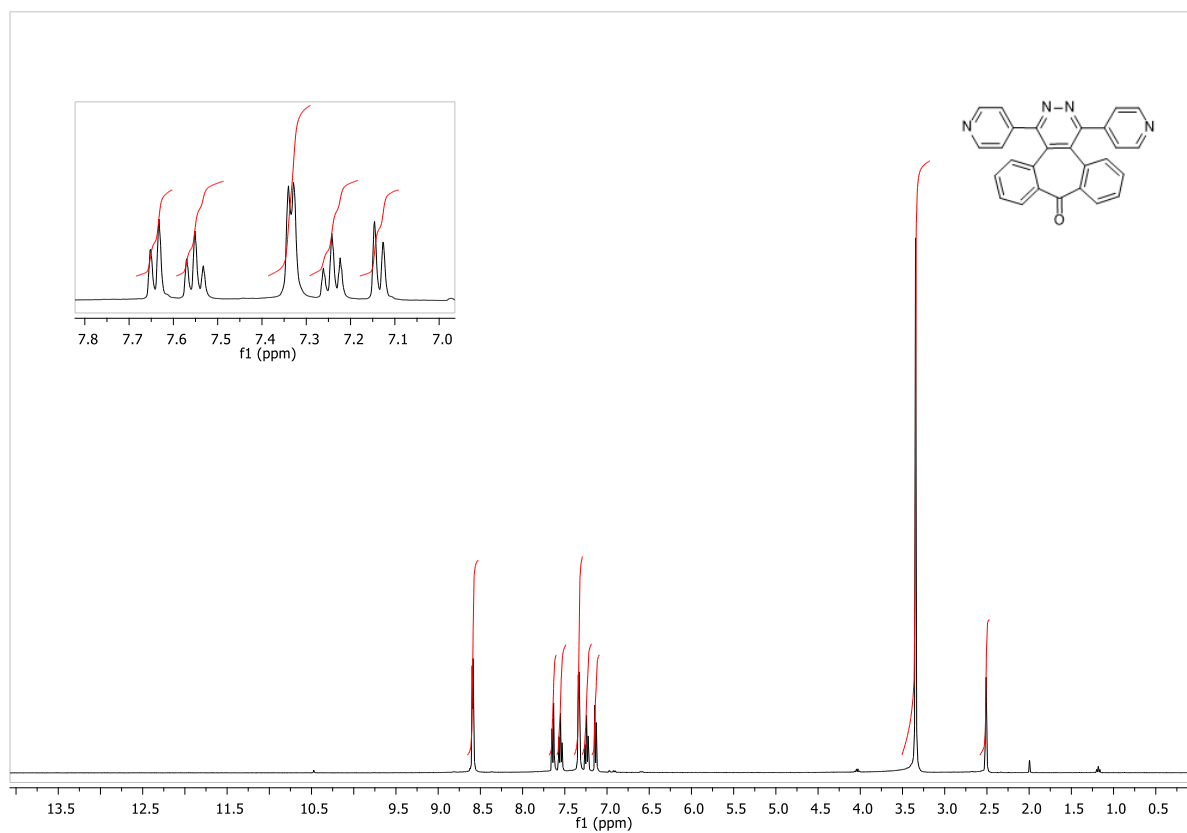

**Fig. S19.**  $^1\text{H}$ -NMR spectrum of **4c** (400 MHz,  $\text{DMSO}-d_6$ ).

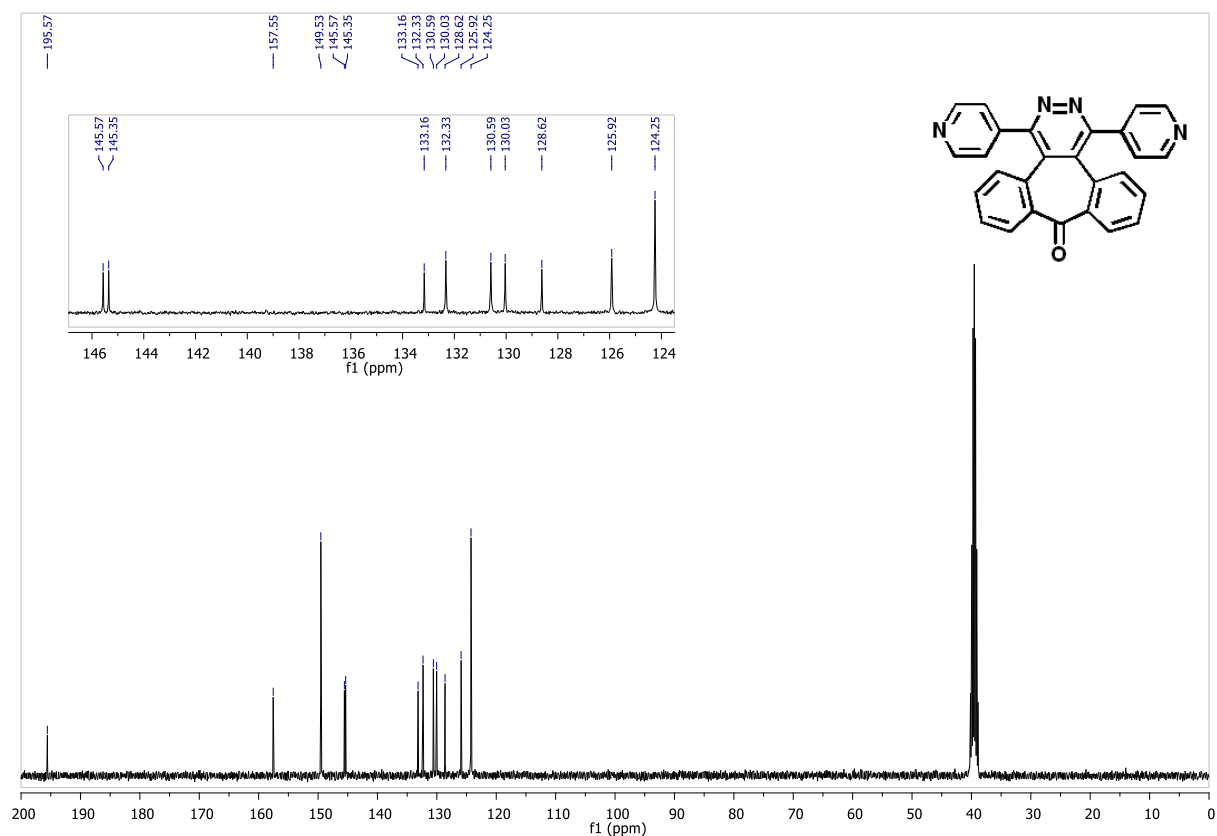

**Fig. S20.** <sup>13</sup>C-NMR spectrum of **4c** (100 MHz, DMSO-*d*<sub>6</sub>).

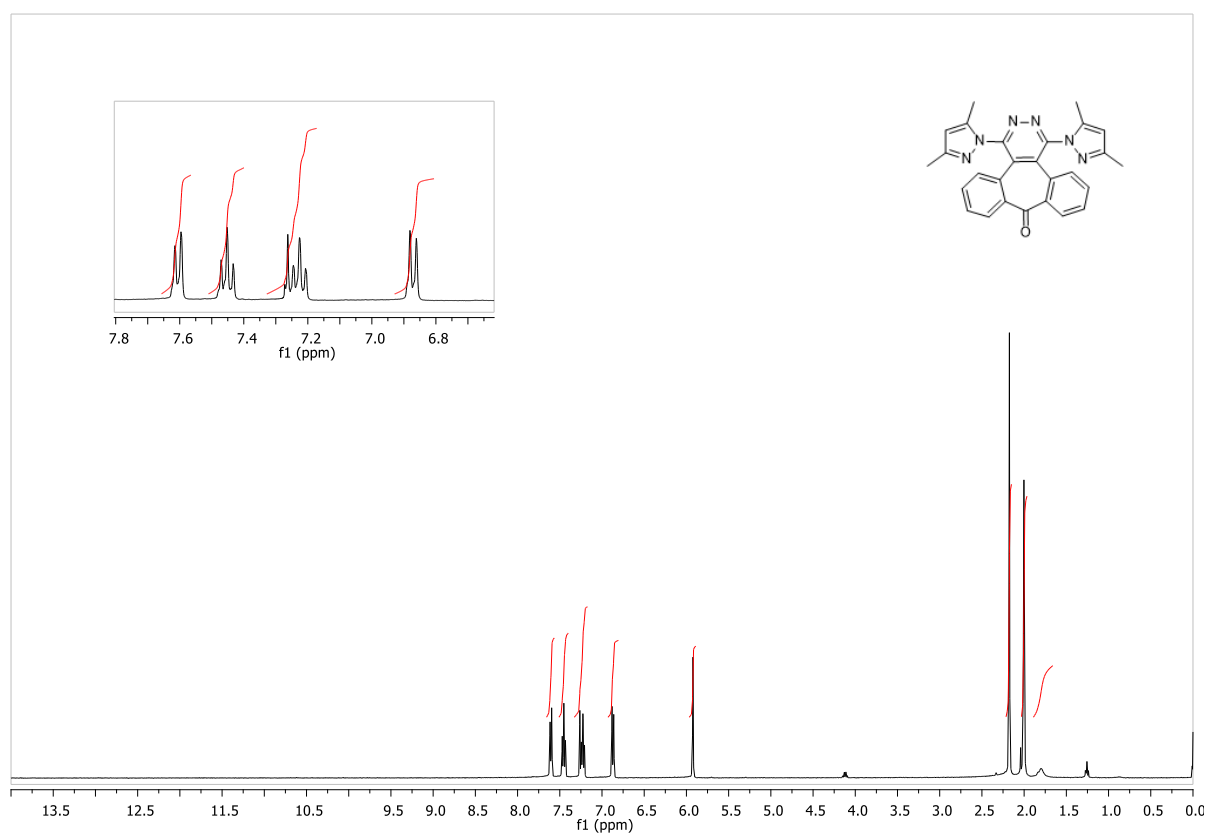

**Fig. S21.** <sup>1</sup>H-NMR spectrum of **4d** (400 MHz, CDCl<sub>3</sub>).

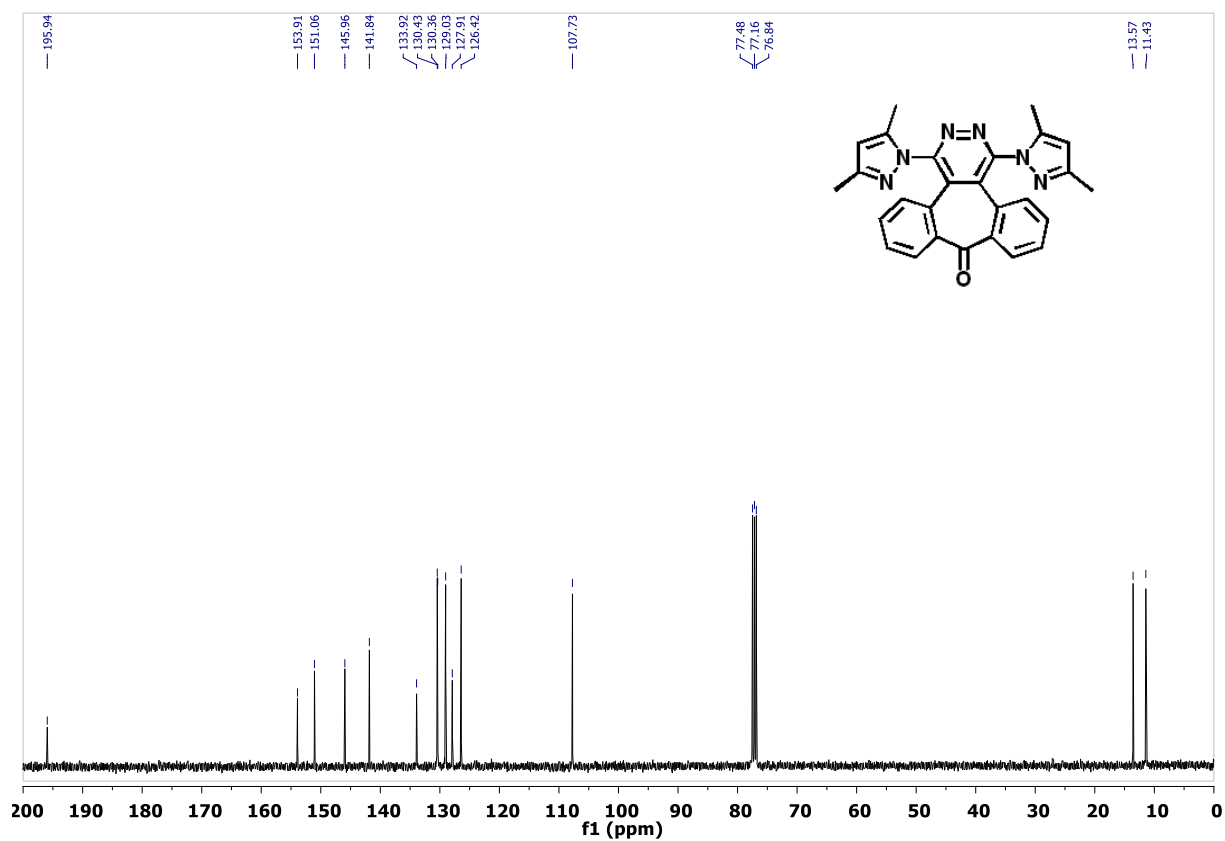

**Fig. S22.**  $^{13}\text{C}$ -NMR spectrum of **4d** (100 MHz,  $\text{CDCl}_3$ ).

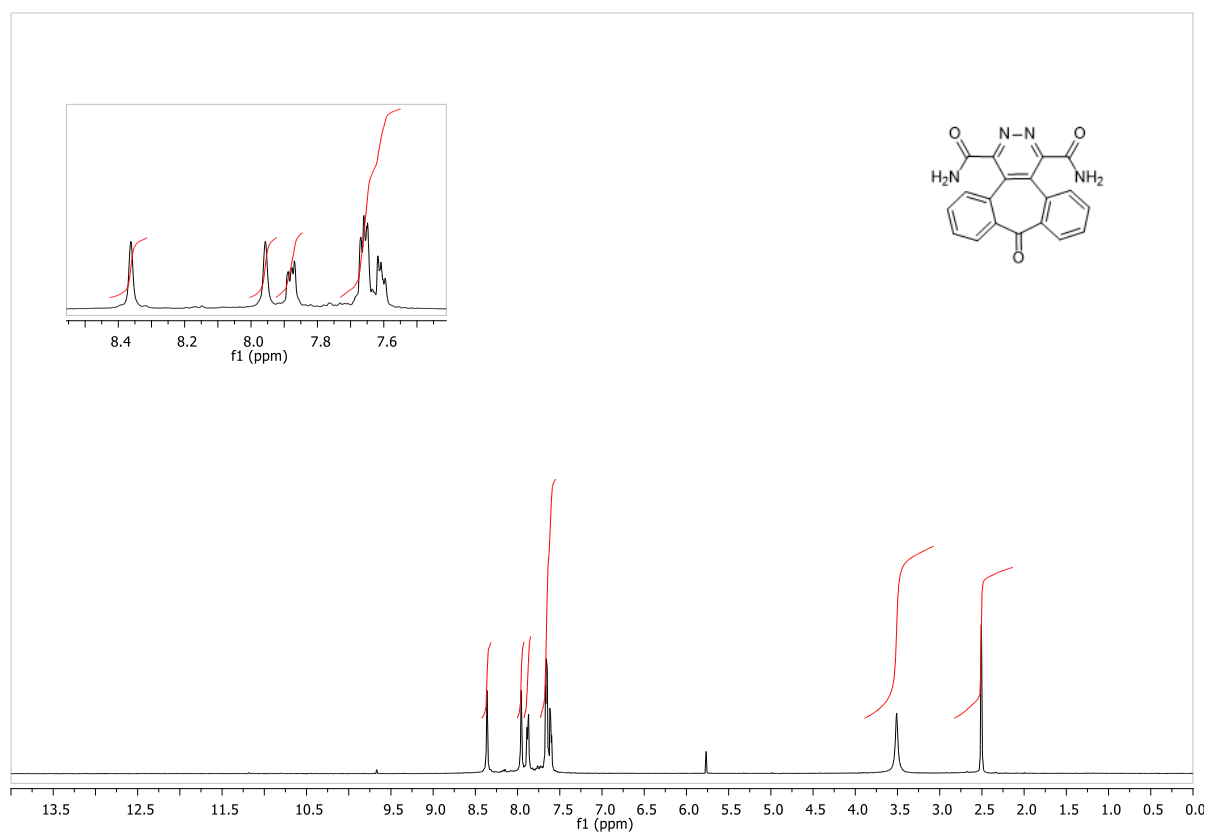

**Fig. S23.**  $^1\text{H}$ -NMR spectrum of **4e** (400 MHz,  $\text{DMSO}-d_6$ ).

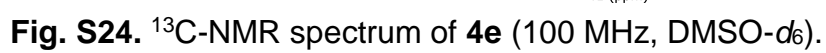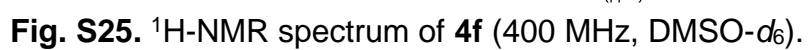

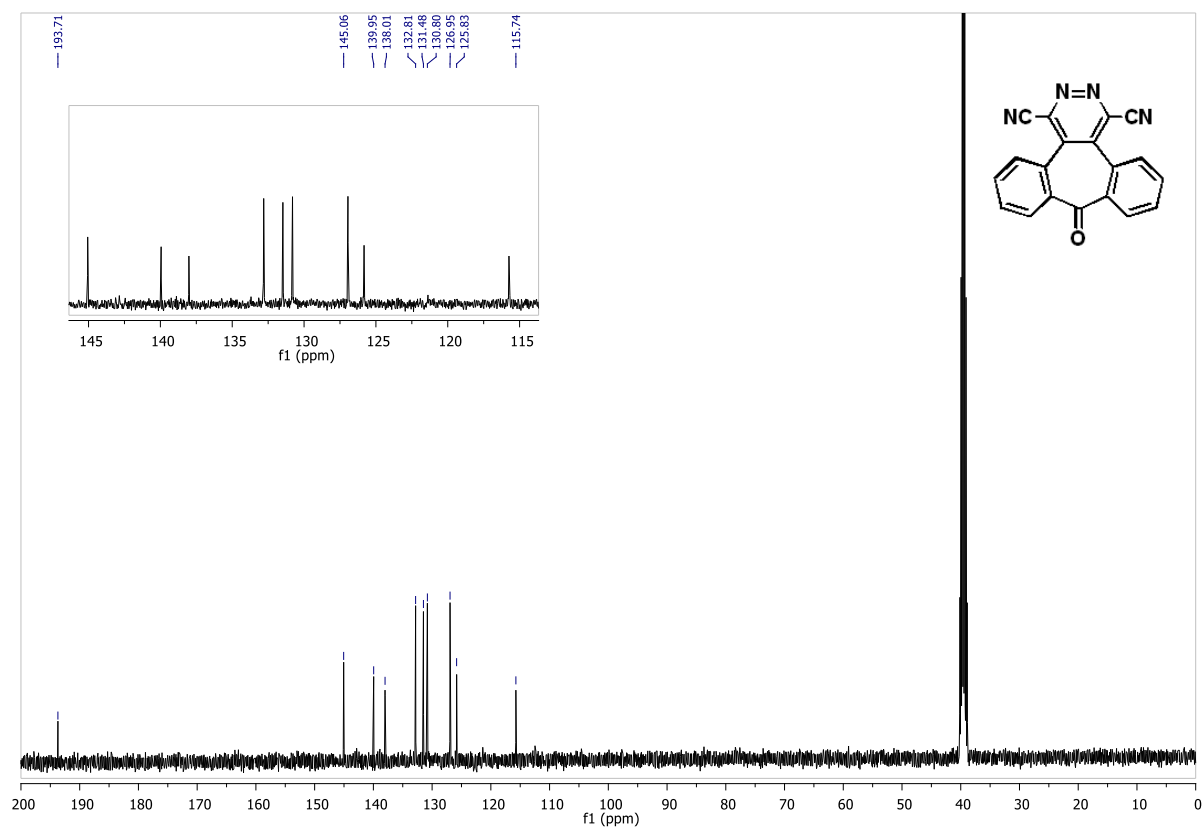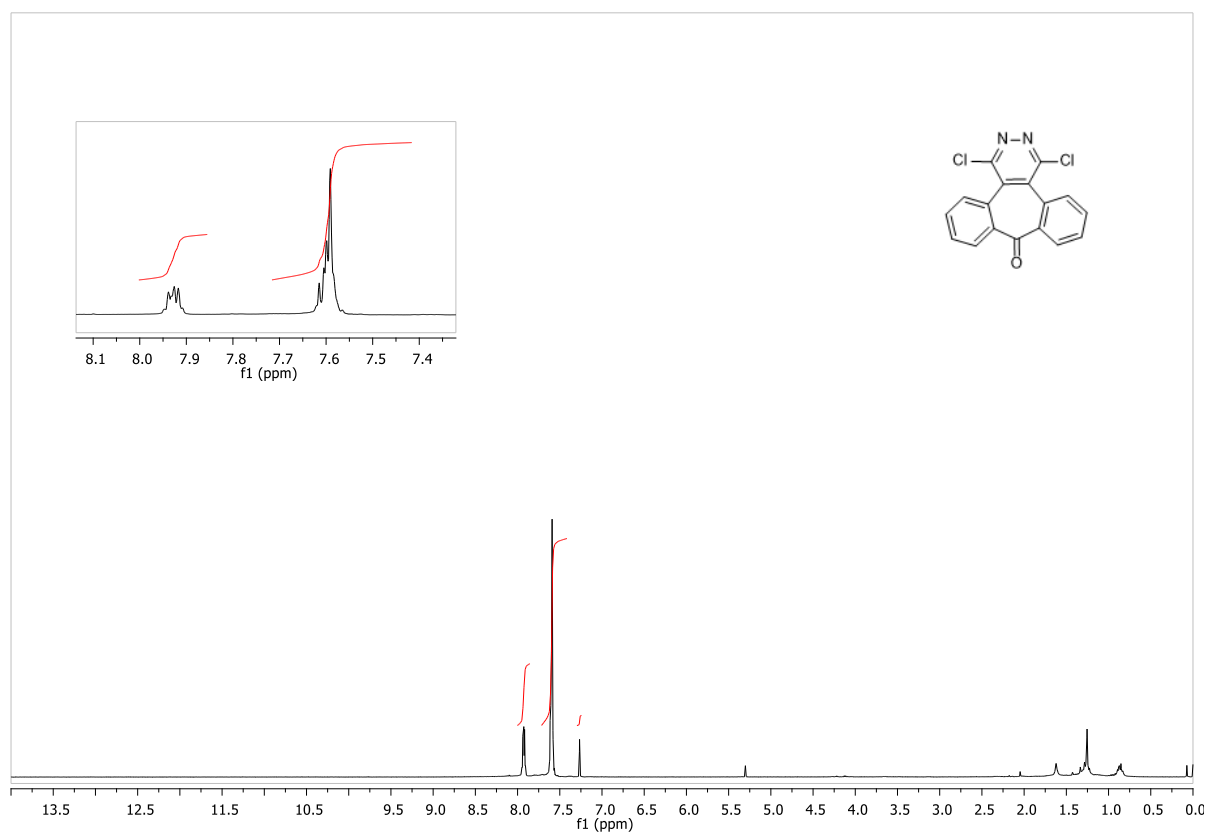

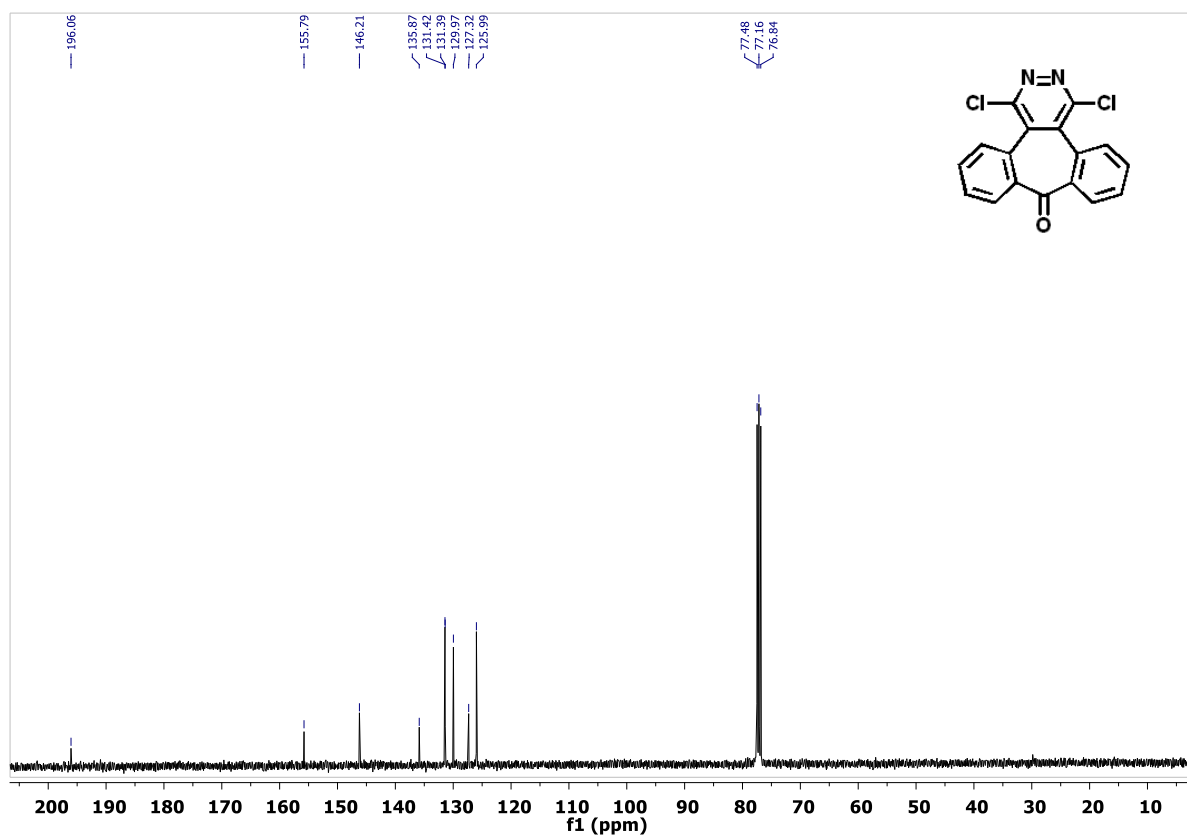

**Fig. S28.** <sup>13</sup>C-NMR spectrum of **4k** (100 MHz, CDCl<sub>3</sub>).

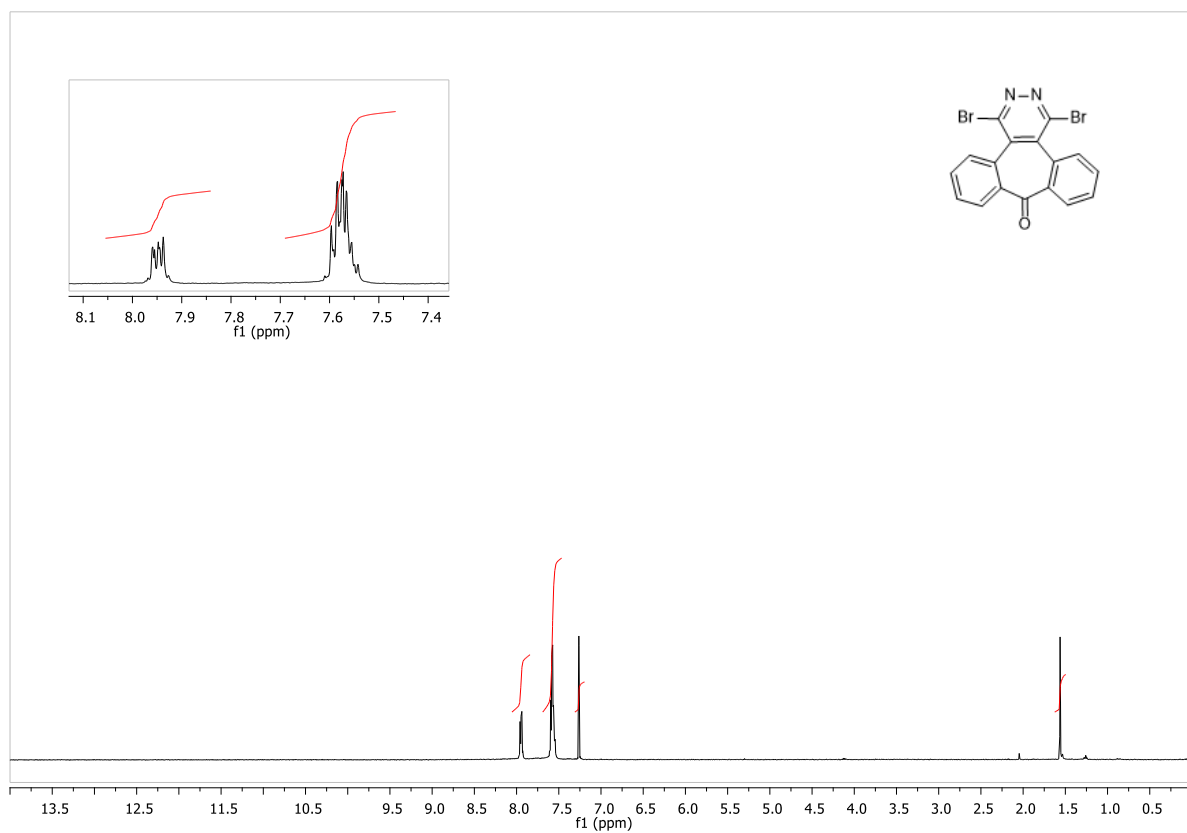

**Fig. S29.** <sup>1</sup>H-NMR spectrum of **4l** (400 MHz, CDCl<sub>3</sub>).

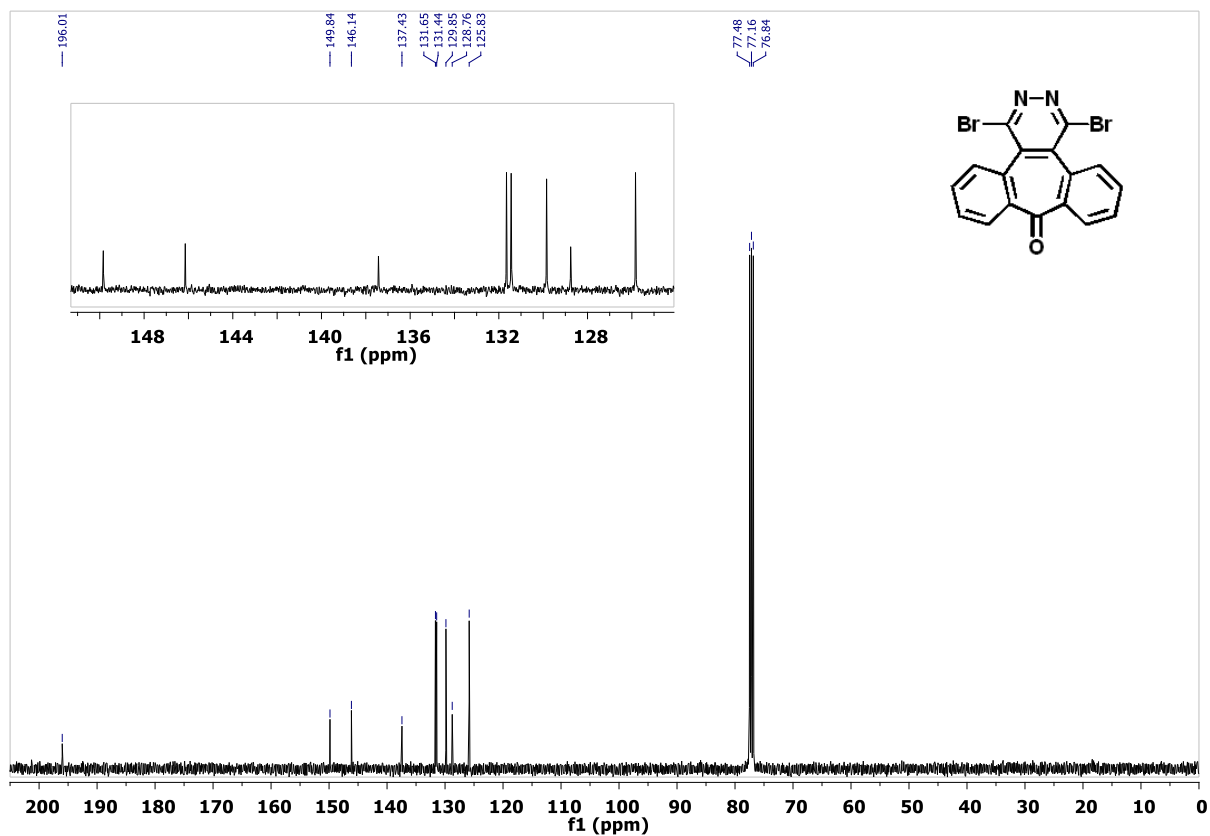

**Fig. S30.** <sup>13</sup>C-NMR spectrum of **4I** (100 MHz, CDCl<sub>3</sub>).

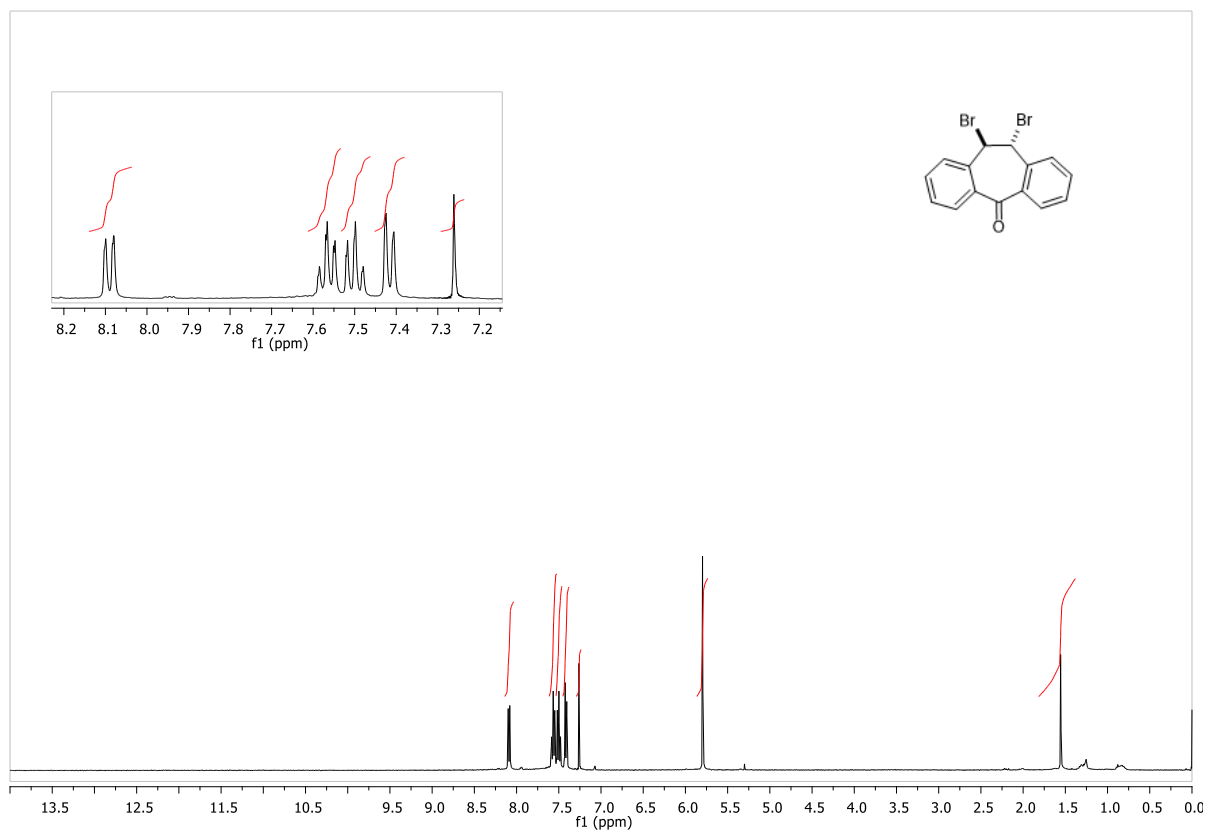

**Fig. S31.** <sup>1</sup>H-NMR spectrum of **5I** (400 MHz, CDCl<sub>3</sub>).

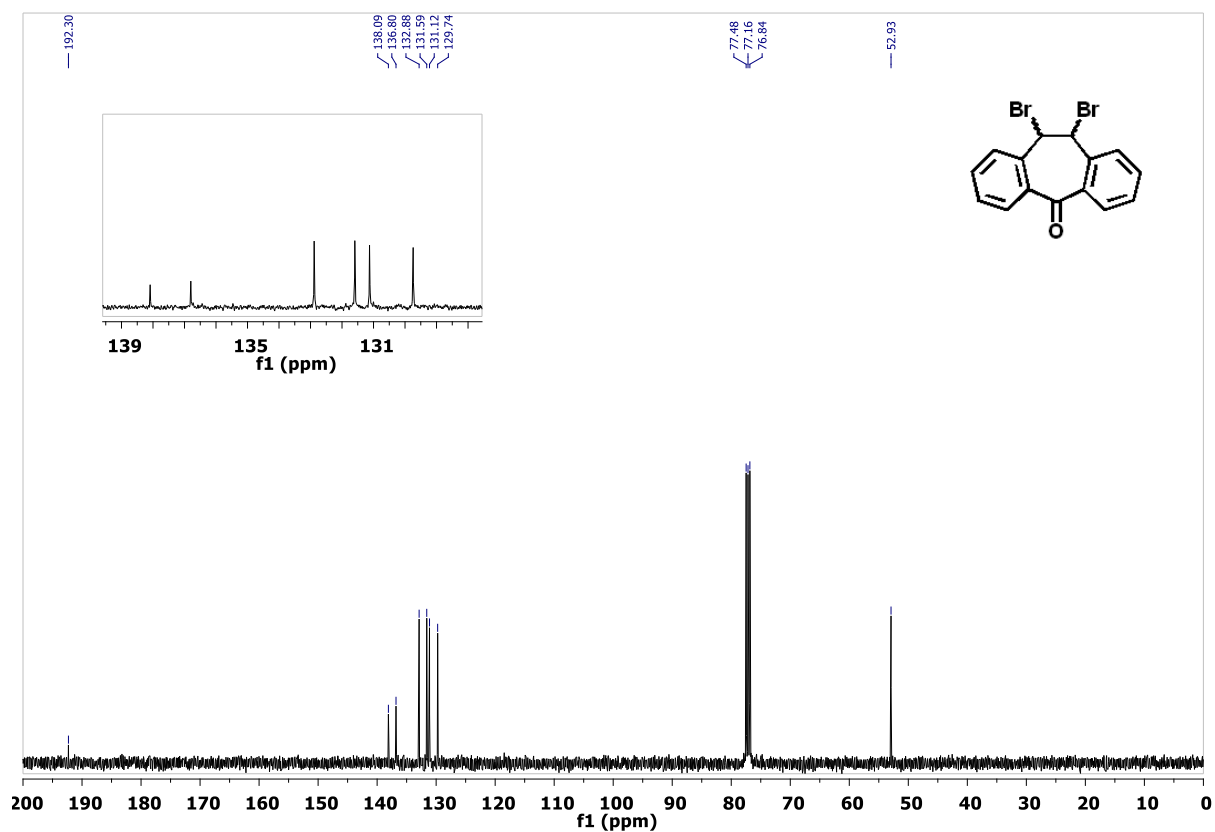

**Fig. S32.**  $^{13}\text{C}$ -NMR spectrum of **5I** (100 MHz,  $\text{CDCl}_3$ ).

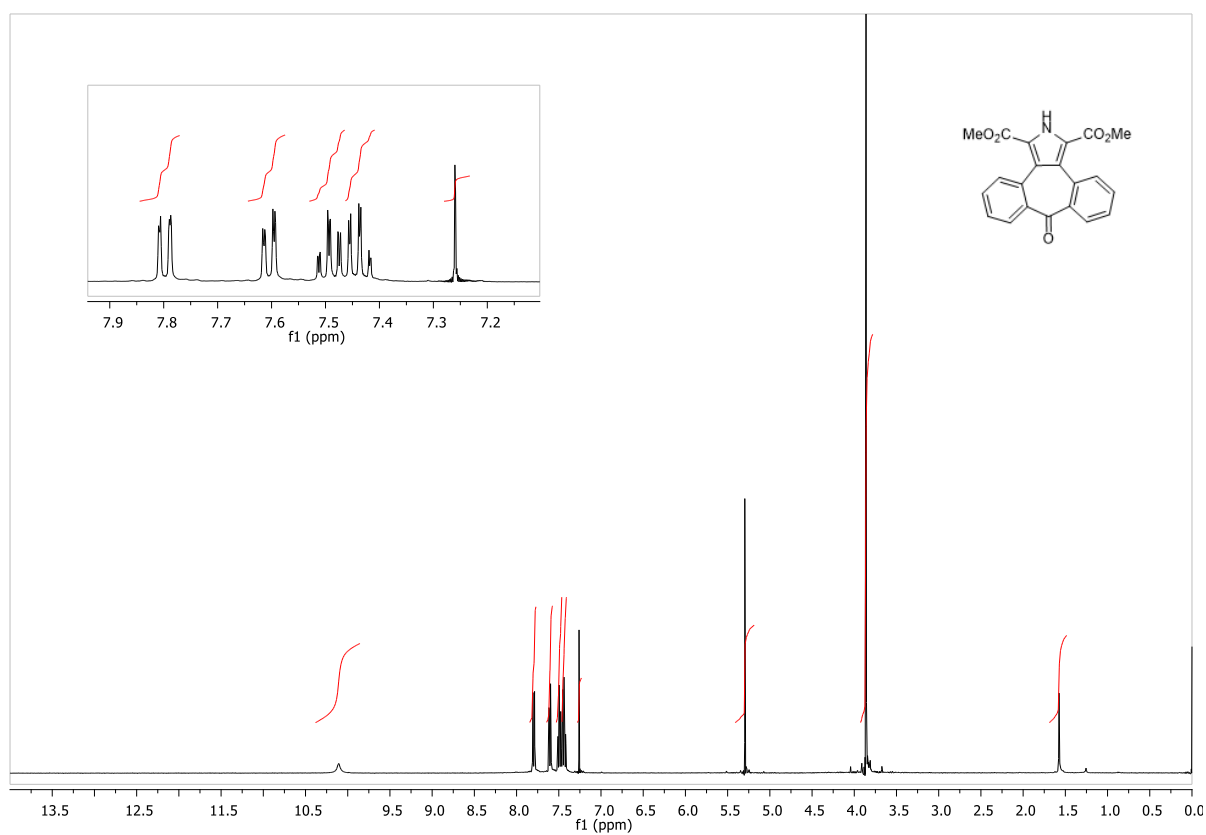

**Fig. S33.**  $^1\text{H}$ -NMR spectrum of **10aa** (400 MHz,  $\text{CDCl}_3$ ).

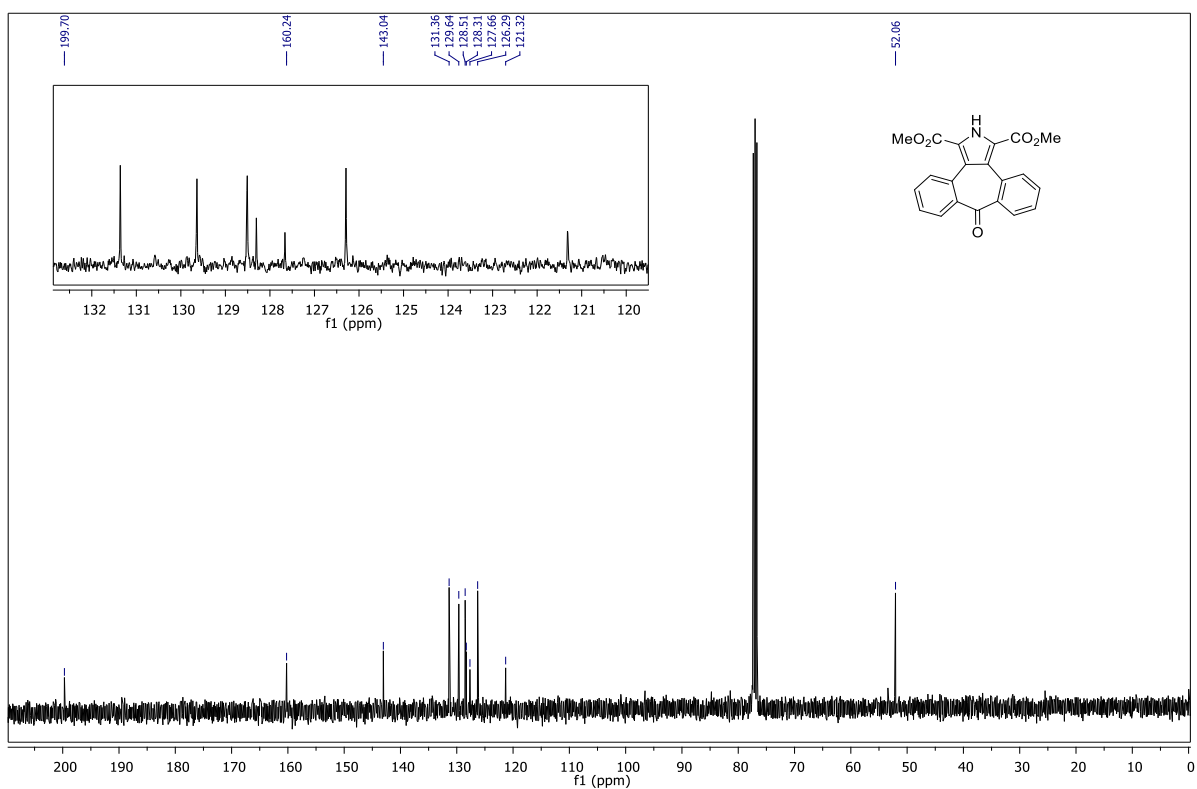

**Fig. S34.** <sup>13</sup>C-NMR spectrum of **10aa** (100 MHz, CDCl<sub>3</sub>).

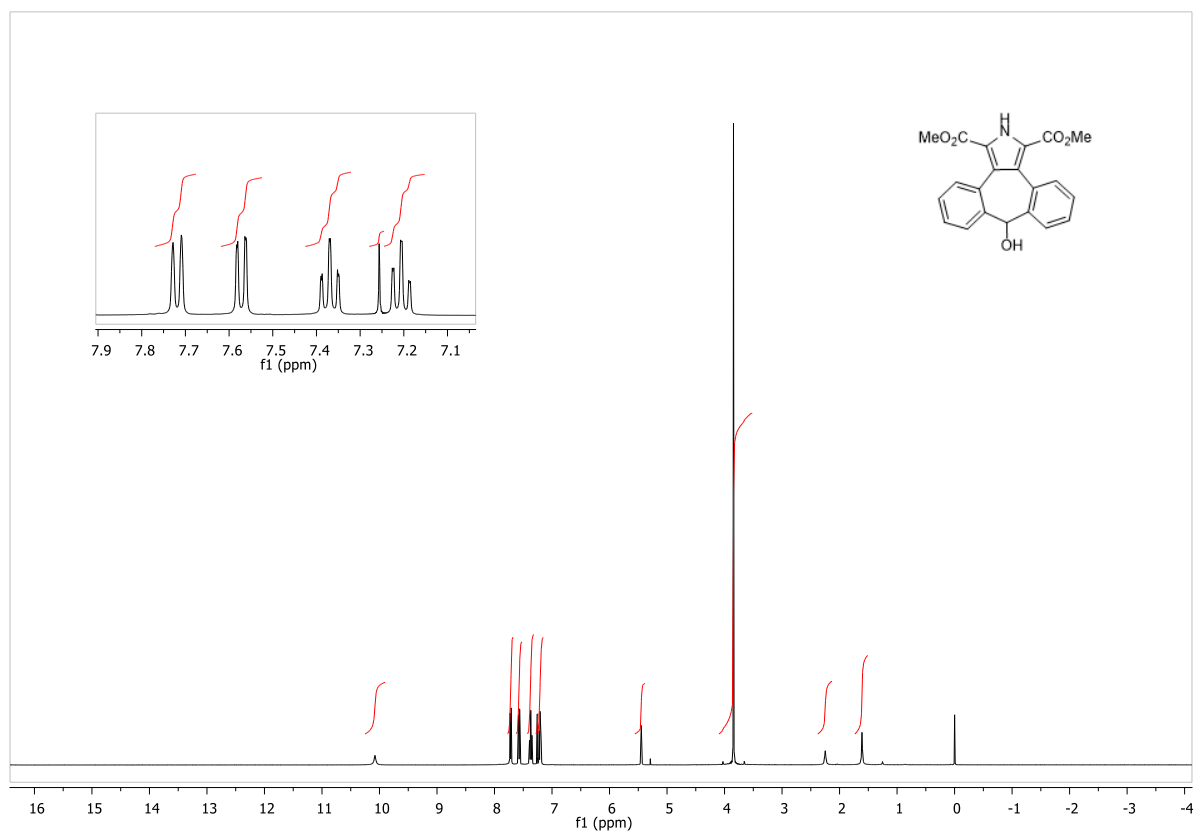

**Fig. S35.** <sup>1</sup>H-NMR spectrum of **10ab** (400 MHz, CDCl<sub>3</sub>).

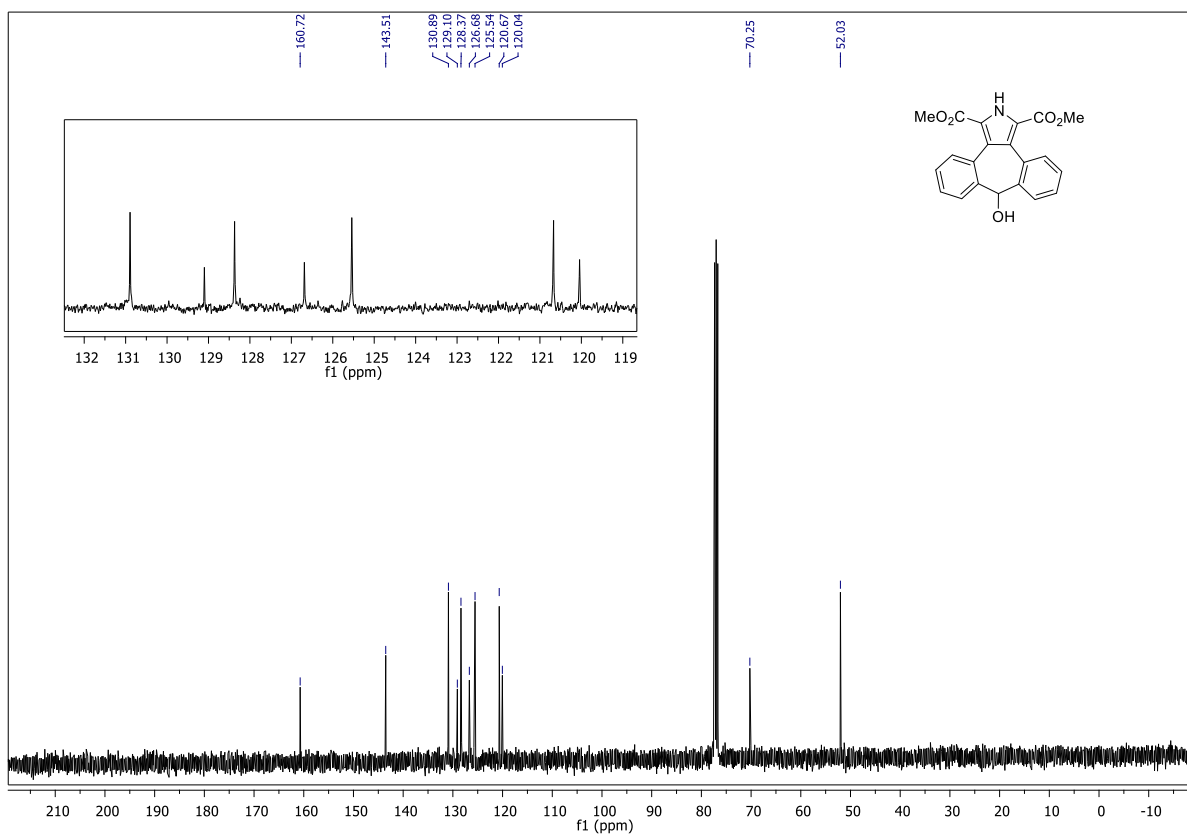

**Fig. S36.** <sup>13</sup>C-NMR spectrum of **10ab** (100 MHz, CDCl<sub>3</sub>).

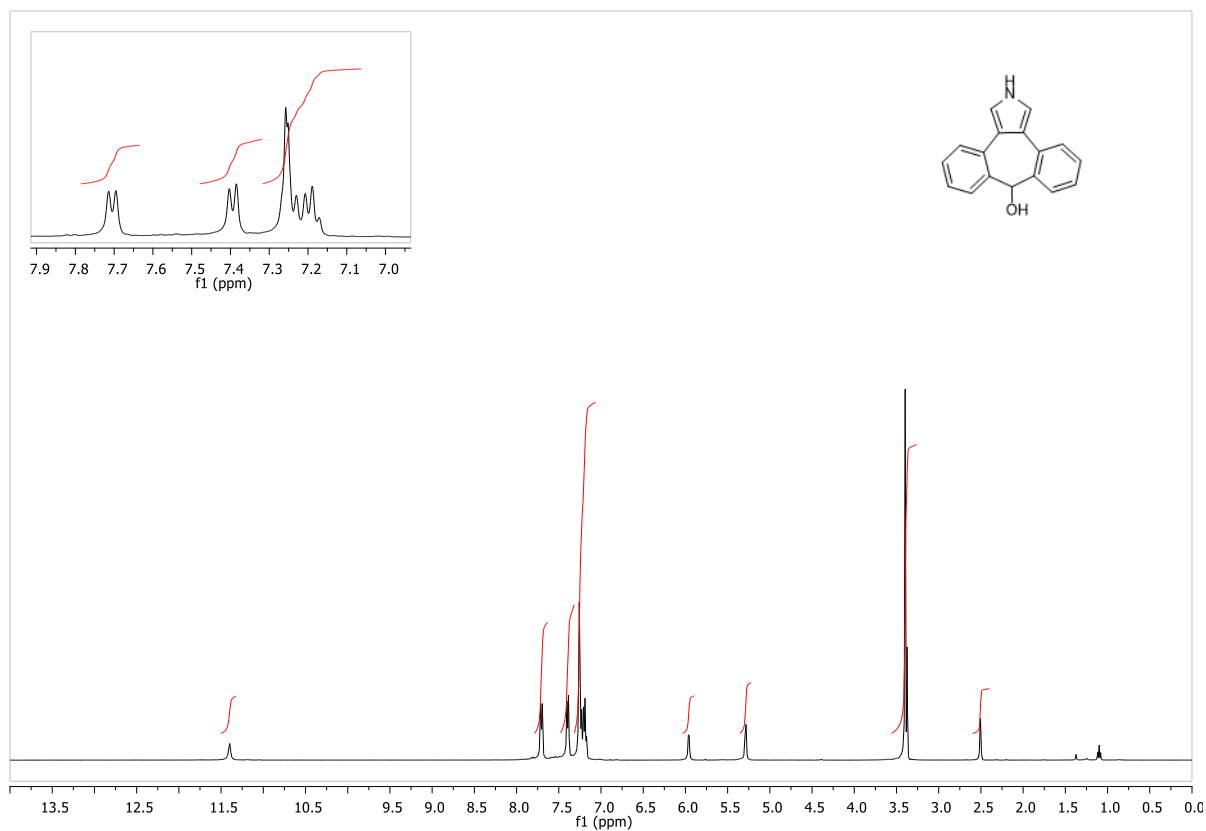

**Fig. S37.** <sup>1</sup>H-NMR spectrum of **10ac** (400 MHz, DMSO-*d*<sub>6</sub>).

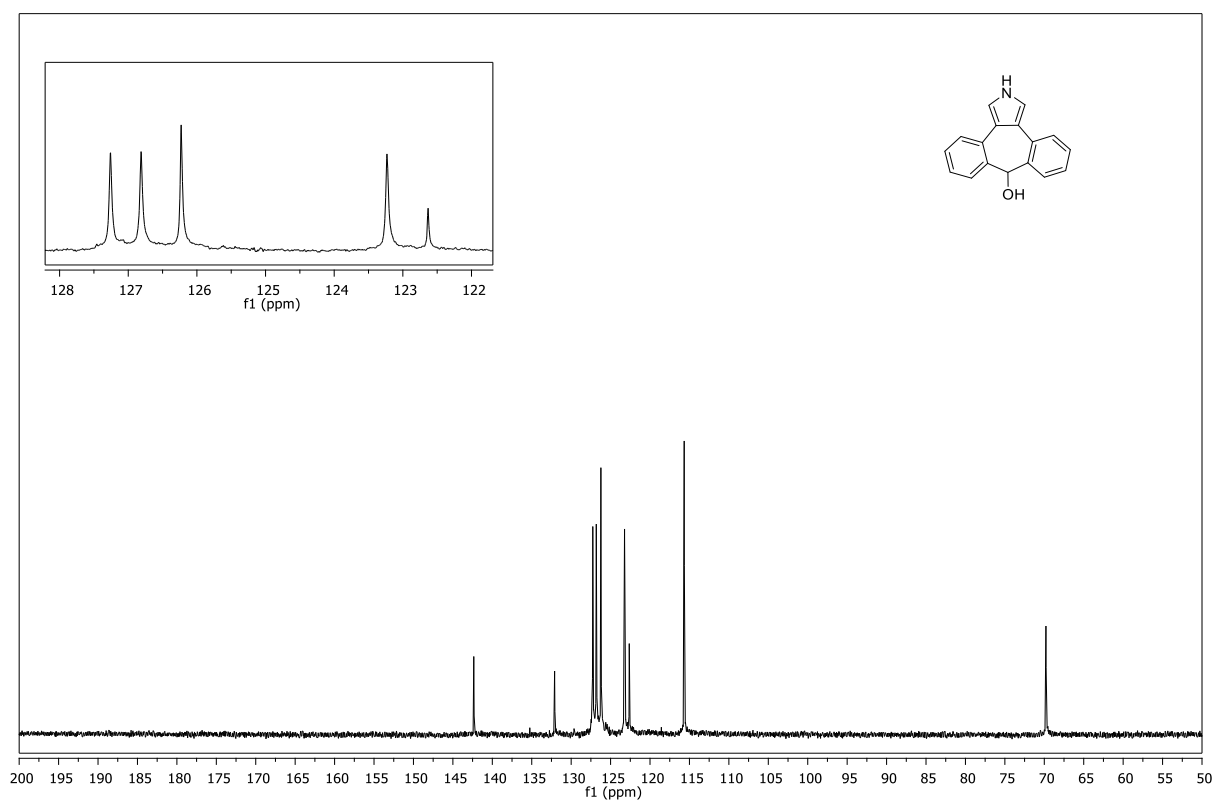

**Fig. S38.**  $^{13}\text{C}$ -NMR spectrum of **10ac** (100 MHz,  $\text{DMSO}-d_6$ ).

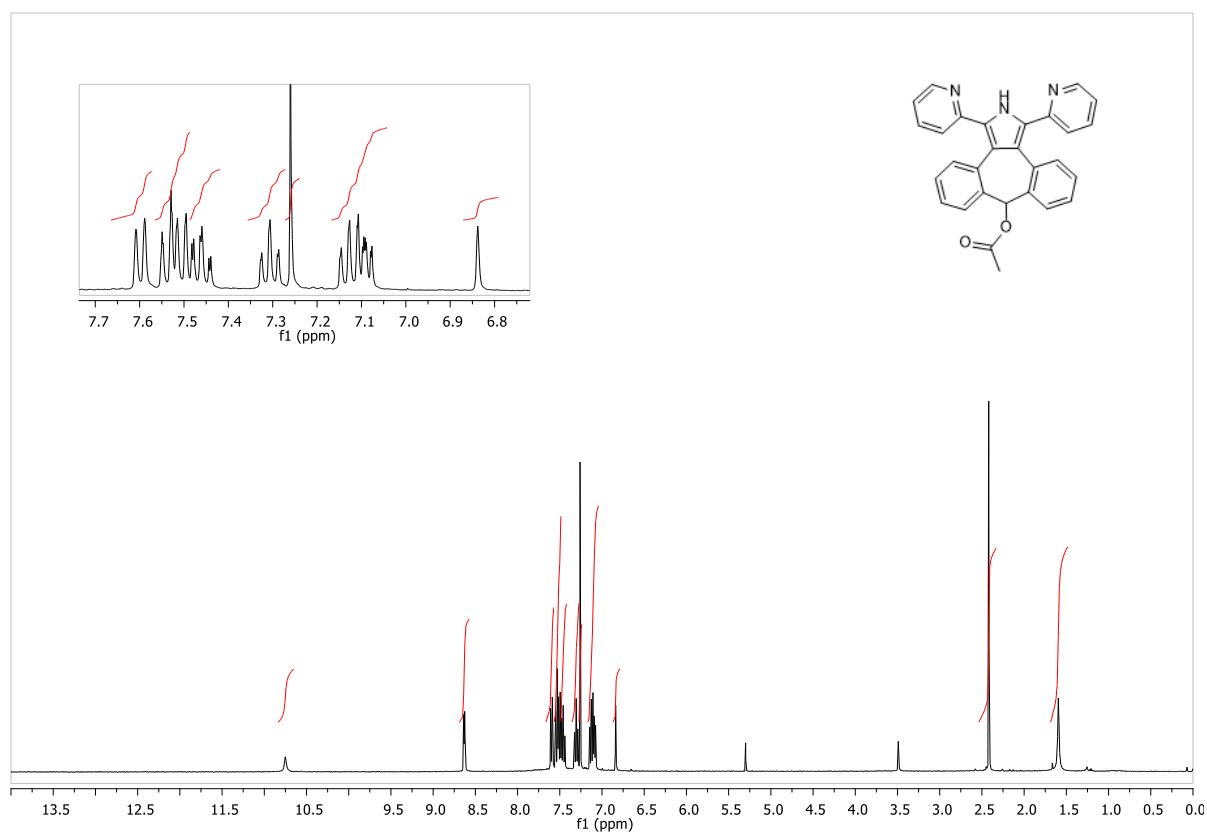

**Fig. S39.**  $^1\text{H}$ -NMR spectrum of **10ba** (400 MHz,  $\text{CDCl}_3$ ).

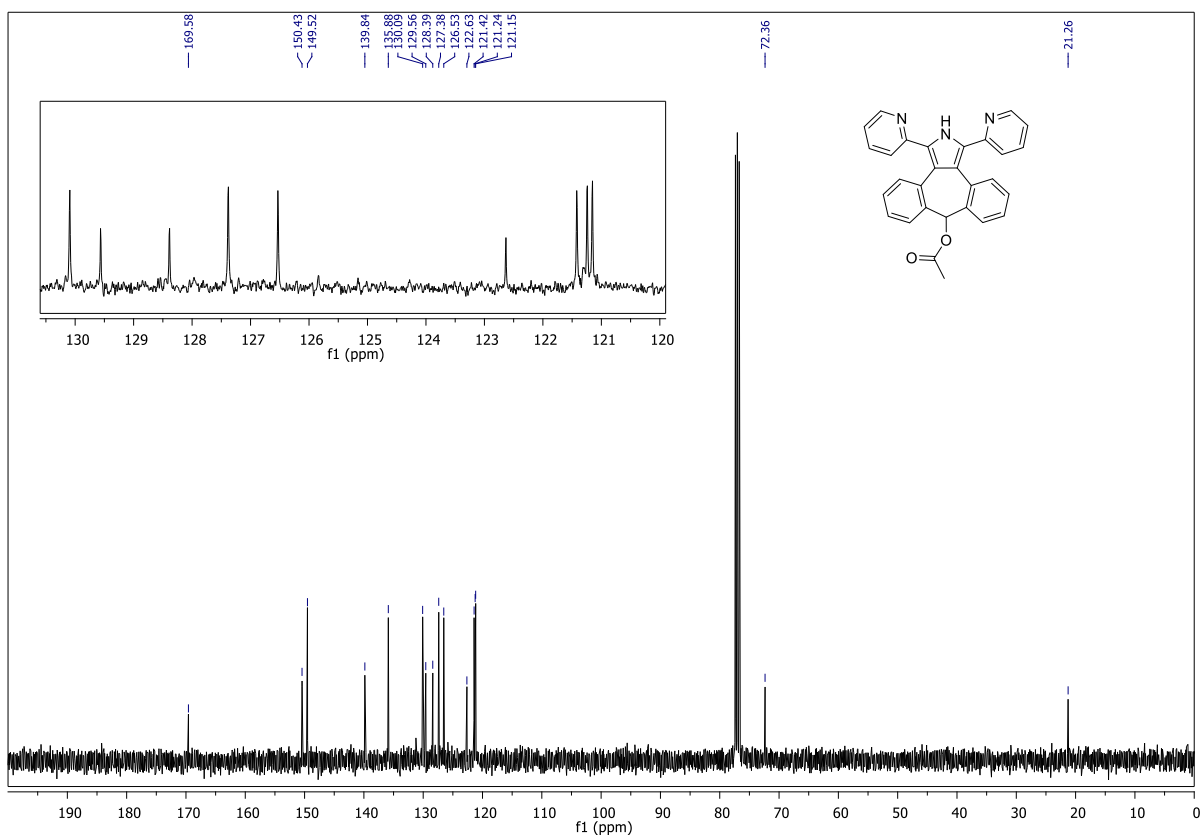

**Fig. S40.** <sup>13</sup>C-NMR spectrum of **10ba** (100 MHz, CDCl<sub>3</sub>).

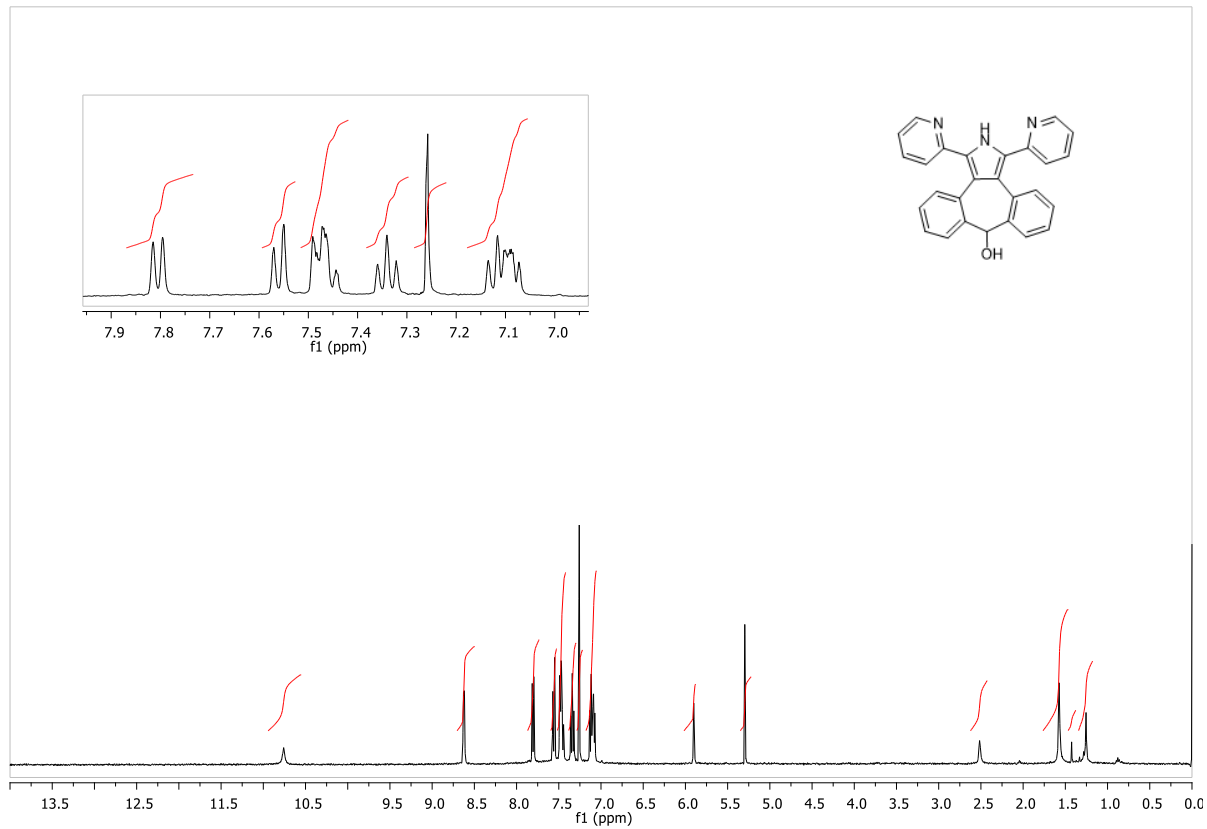

**Fig. S41.** <sup>1</sup>H-NMR spectrum of **10bb** (400 MHz, CDCl<sub>3</sub>).

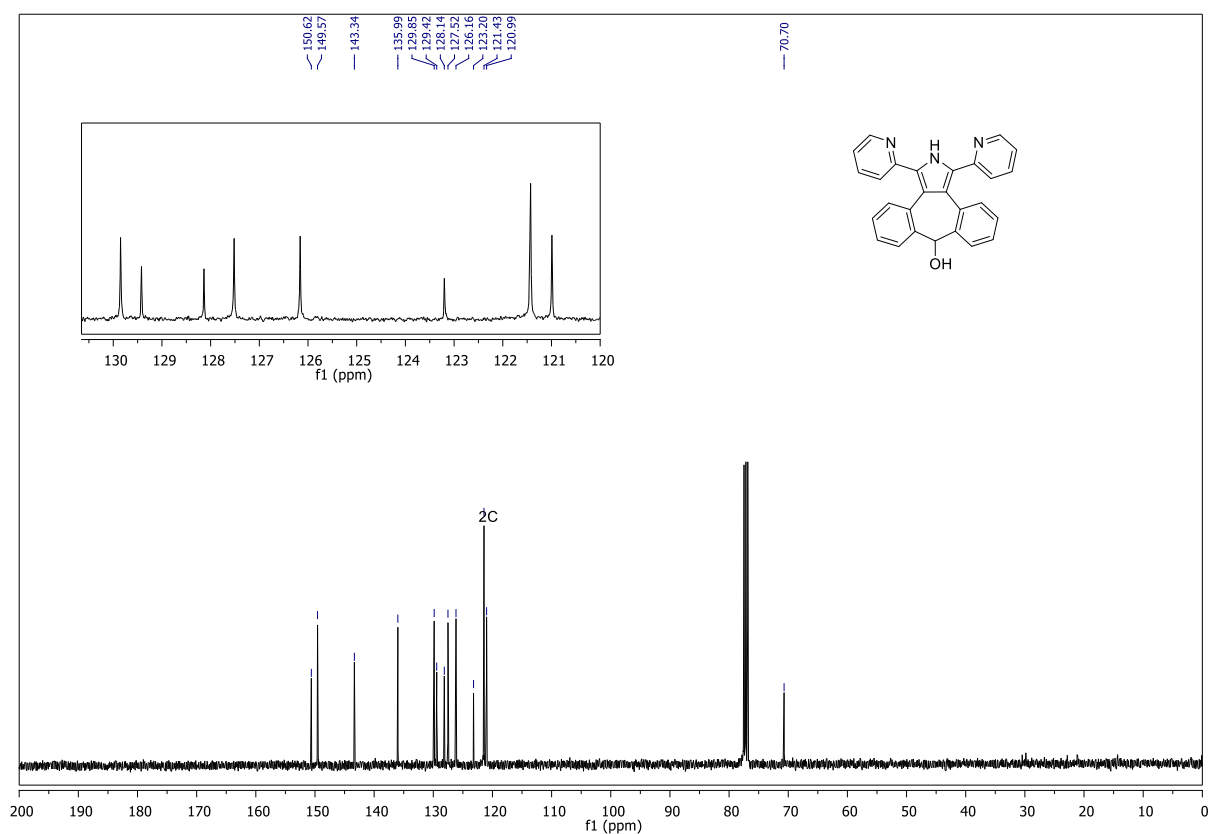

**Fig. S42.** <sup>13</sup>C-NMR spectrum of **10bb** (100 MHz, CDCl<sub>3</sub>).

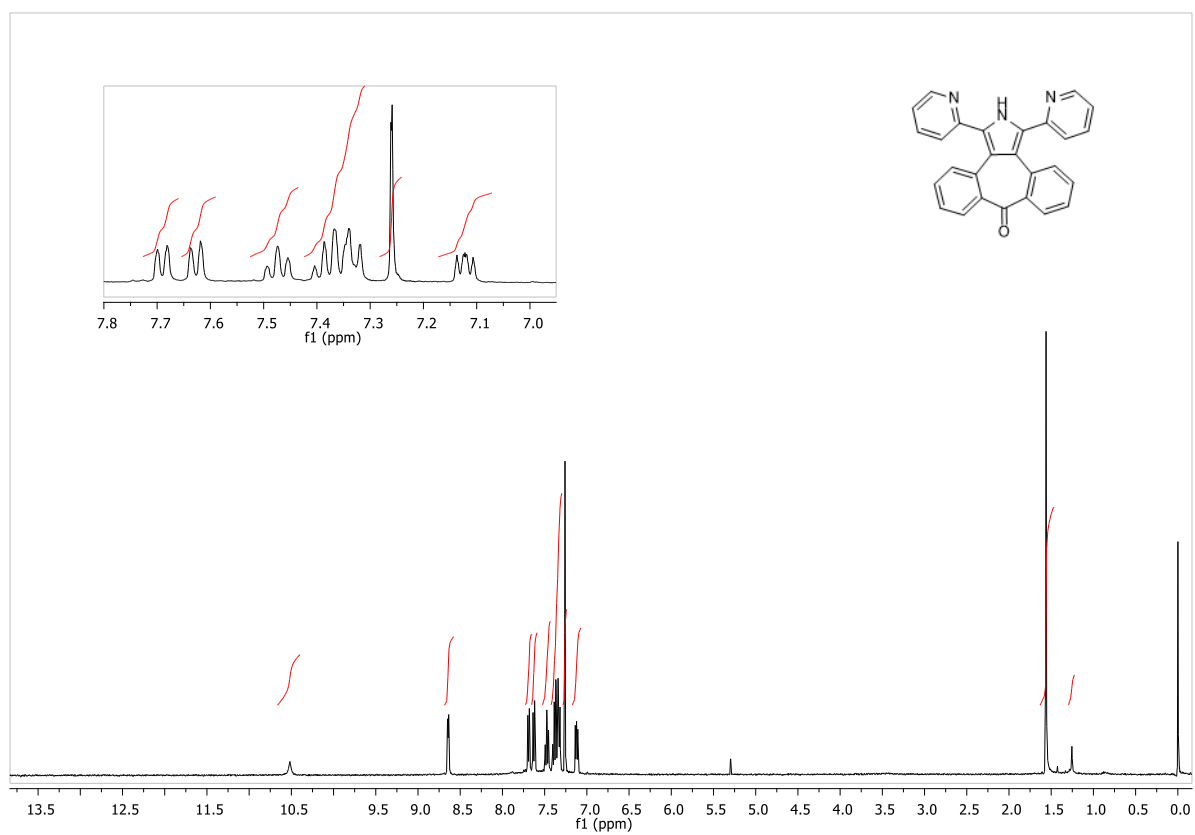

**Fig. S43.** <sup>1</sup>H-NMR spectrum of **10bc** (400 MHz, CDCl<sub>3</sub>).

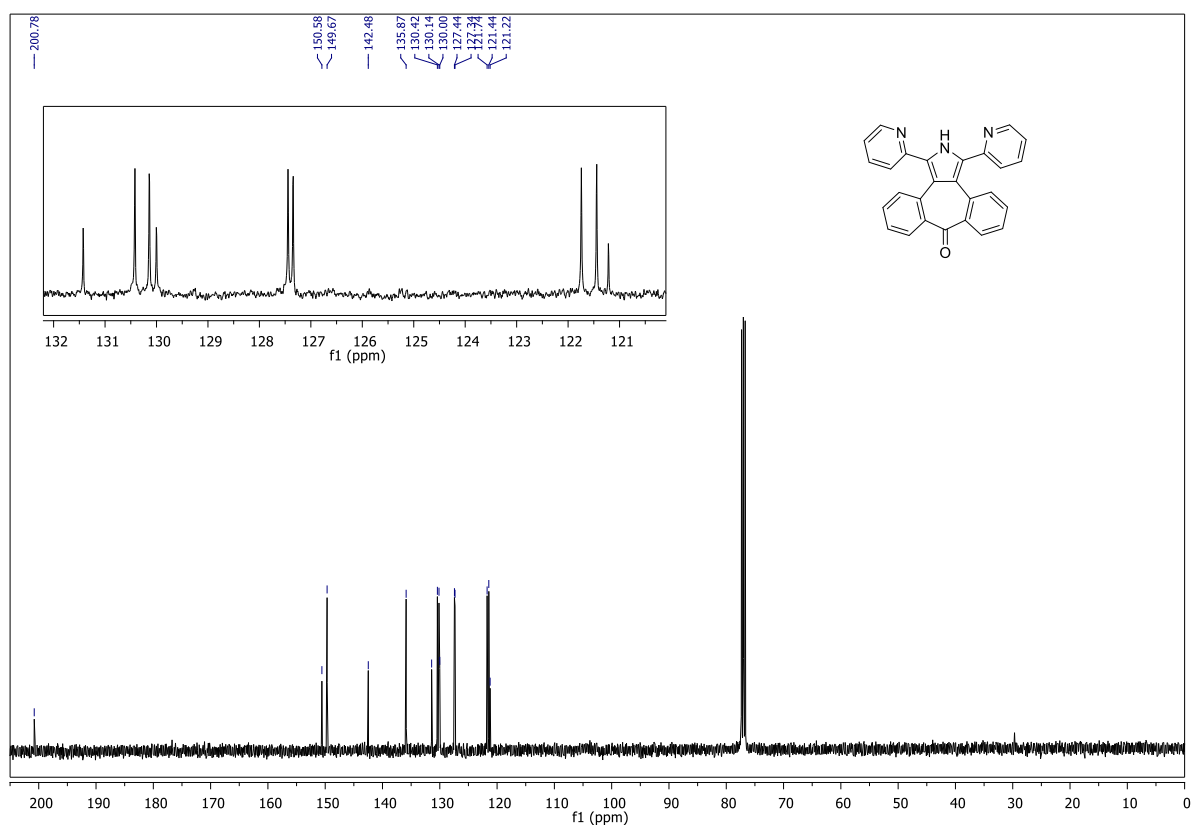

**Fig. S44.**  $^{13}\text{C}$ -NMR spectrum of **10bc** (100 MHz,  $\text{CDCl}_3$ ).

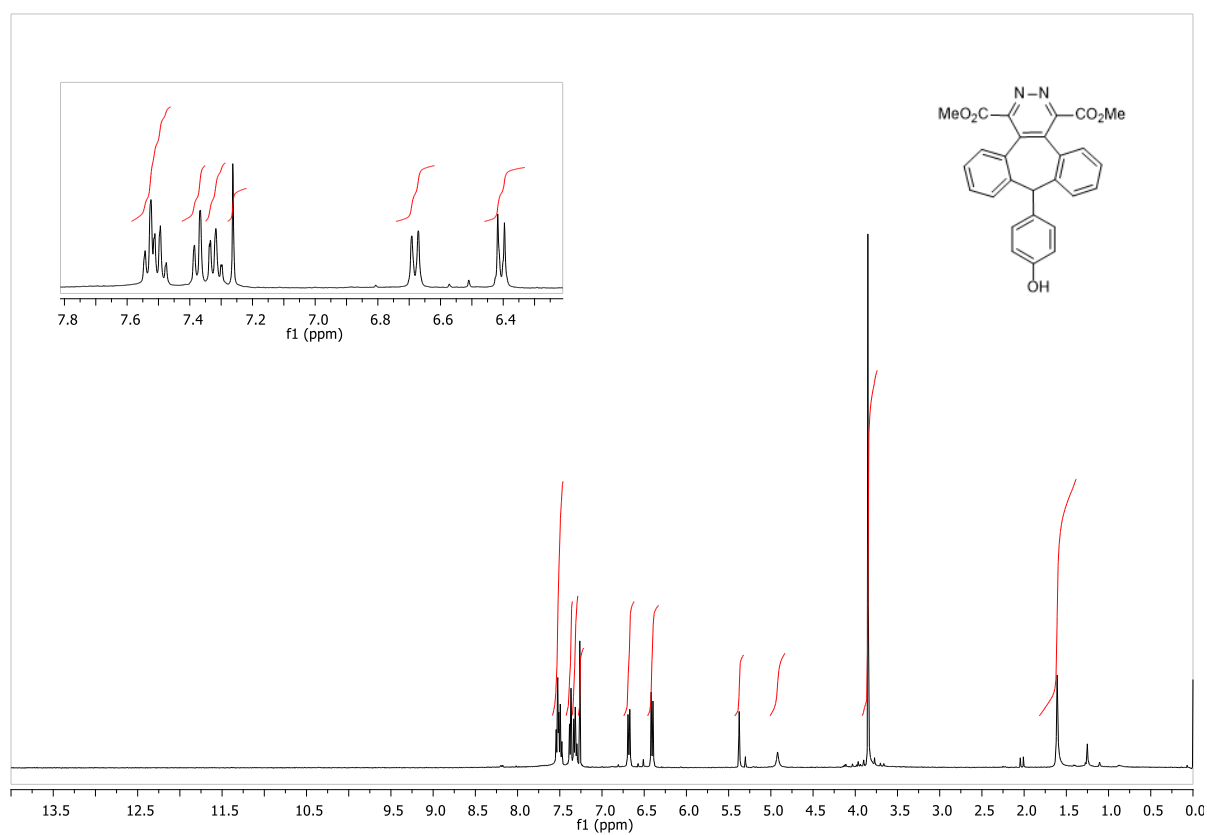

**Fig. S45.**  $^1\text{H}$ -NMR spectrum of **13a** (400 MHz,  $\text{CDCl}_3$ ).

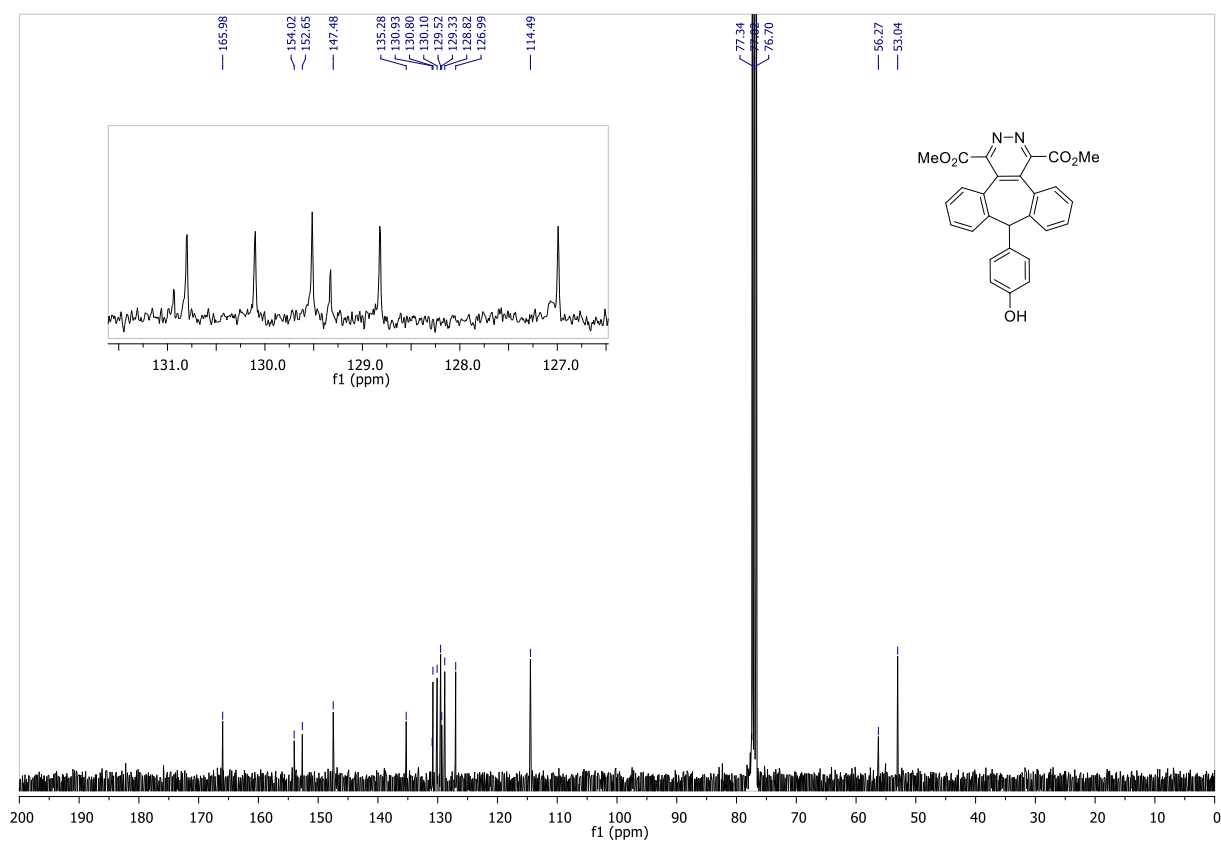

**Fig. S46.** <sup>13</sup>C-NMR spectrum of **13a** (100 MHz, CDCl<sub>3</sub>).

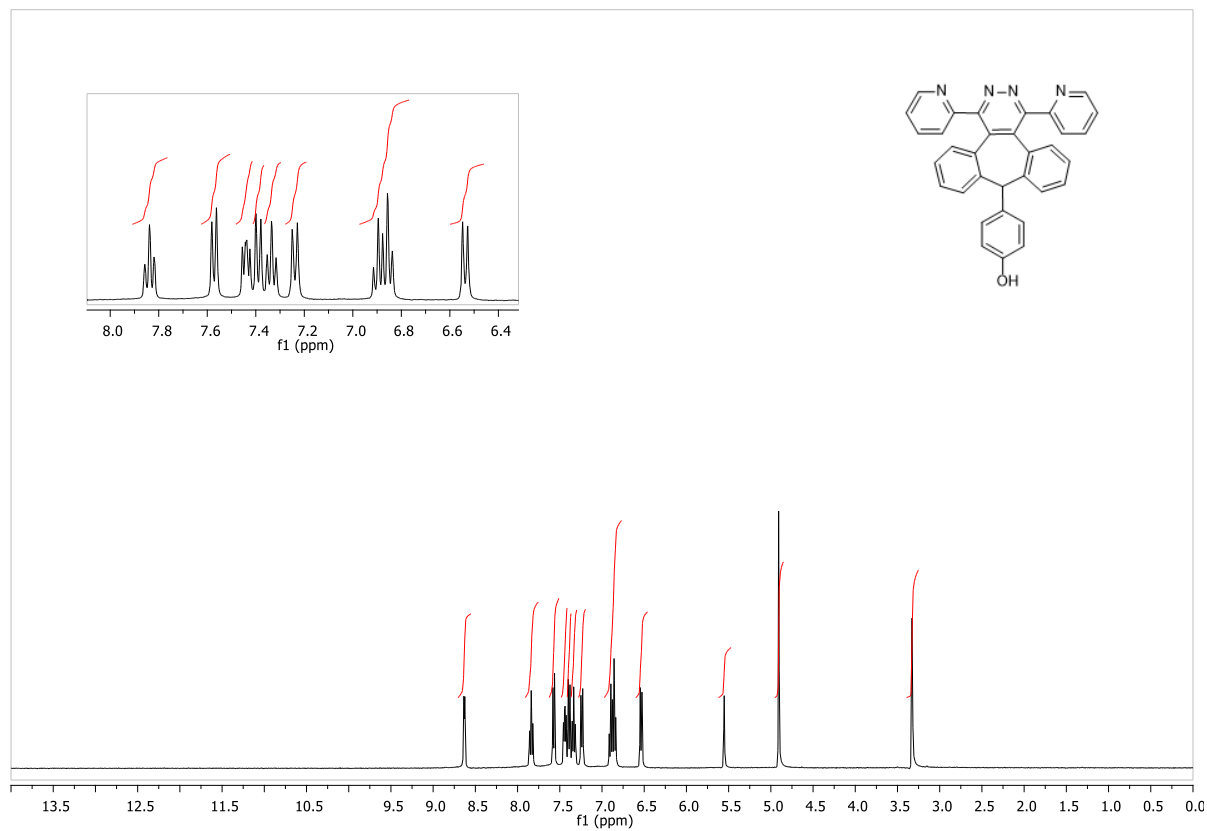

**Fig. S47.** <sup>1</sup>H-NMR spectrum of **13b** (400 MHz, MeOD).

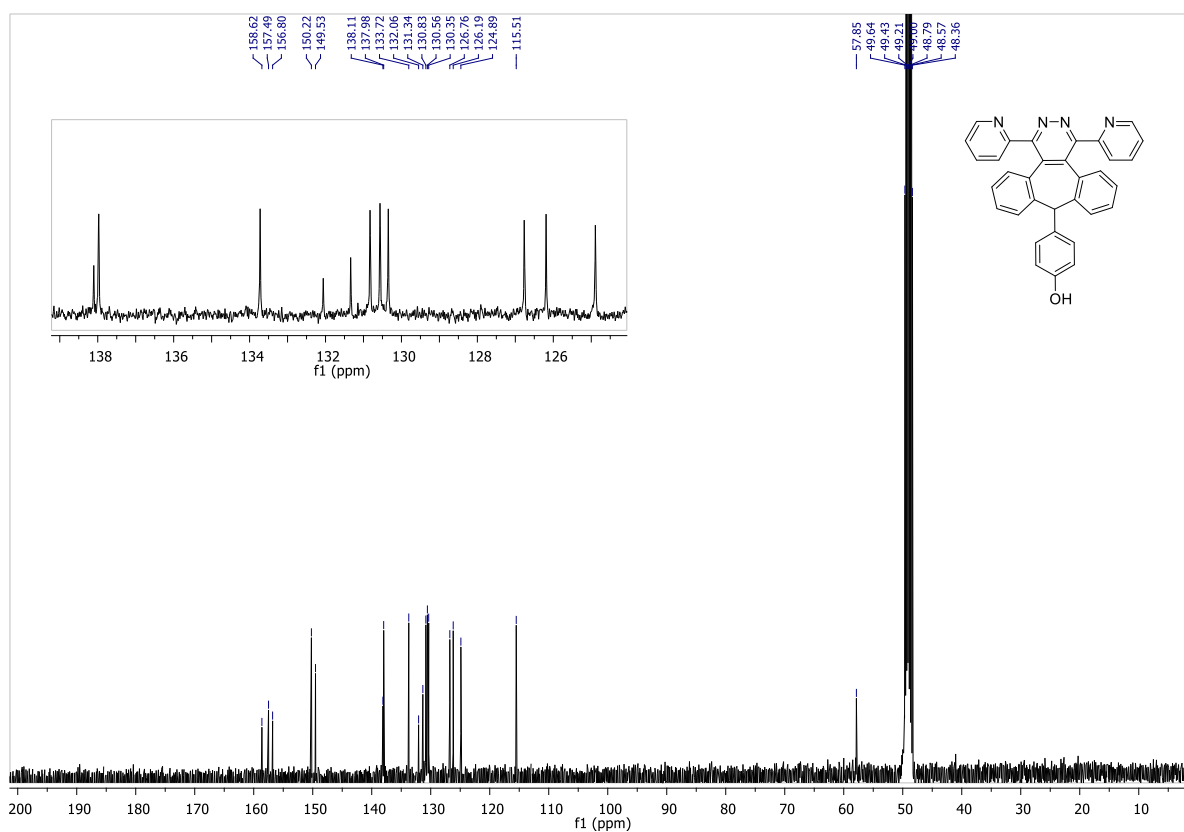

**Fig. S48.** <sup>13</sup>C-NMR spectrum of **13b** (100 MHz, MeOD).

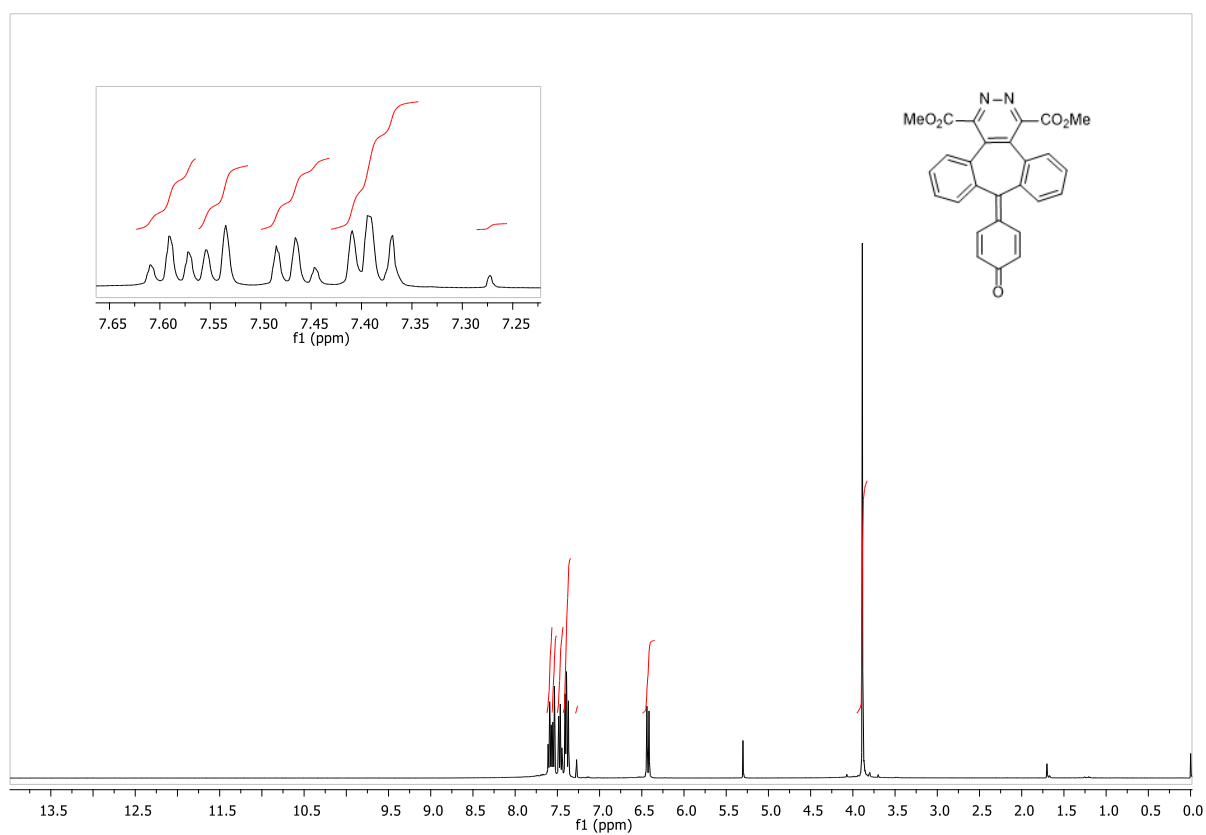

**Fig. S49.** <sup>1</sup>H-NMR spectrum of **14a** (400 MHz, CDCl<sub>3</sub>).

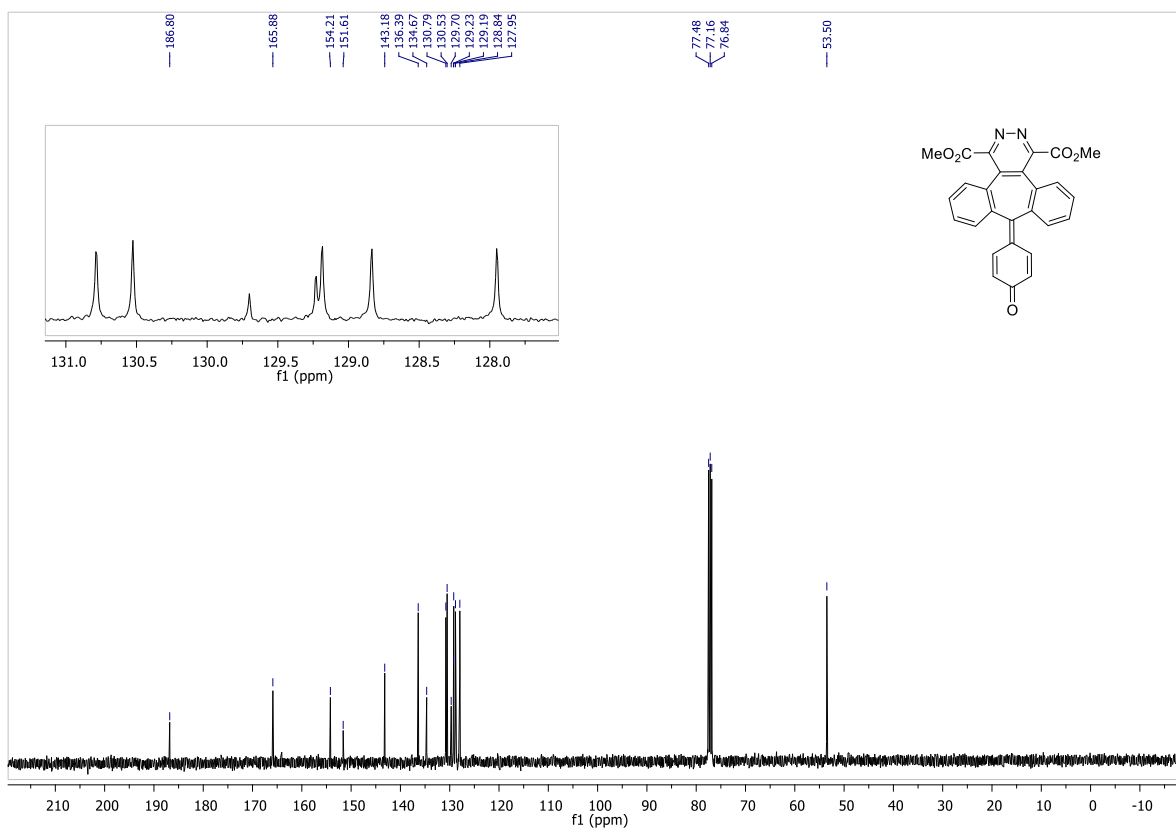

**Fig. S50.** <sup>13</sup>C-NMR spectrum of **14a** (100 MHz, CDCl<sub>3</sub>).

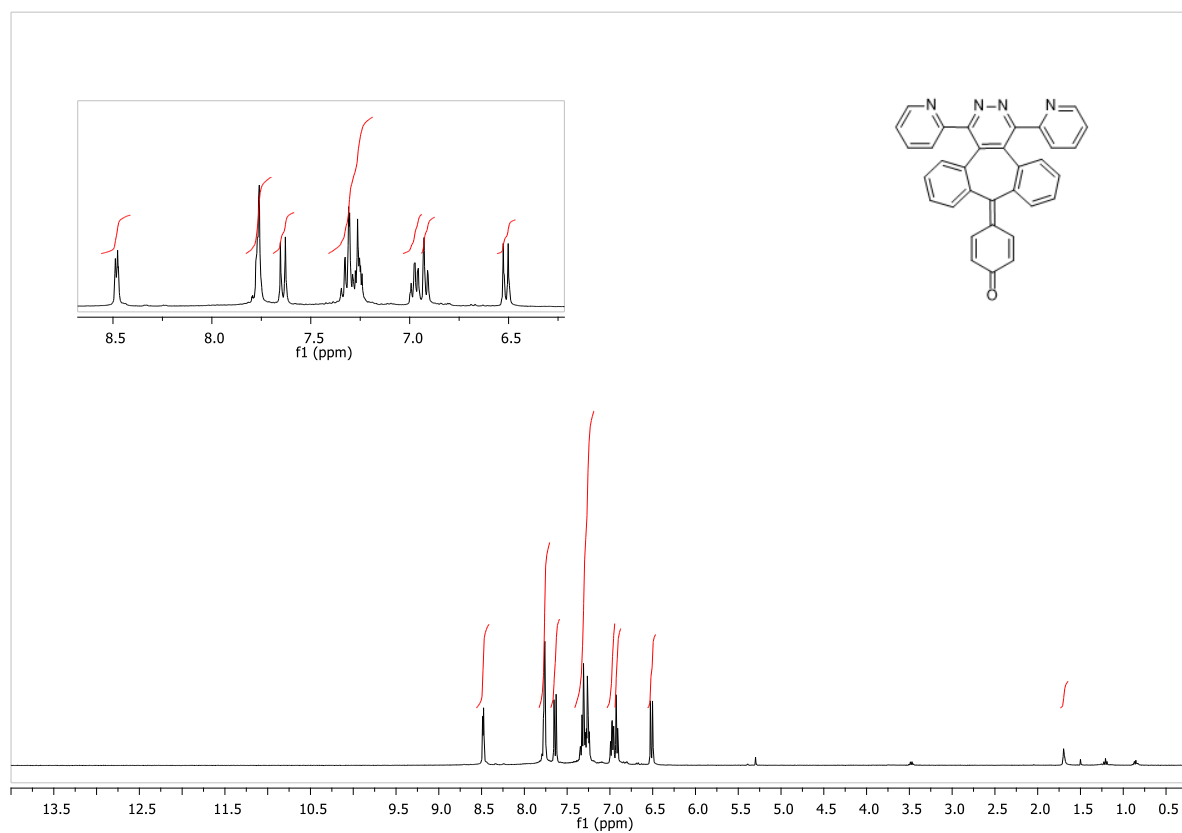

**Fig. S51.** <sup>1</sup>H-NMR spectrum of **14b** (400 MHz, CDCl<sub>3</sub>).

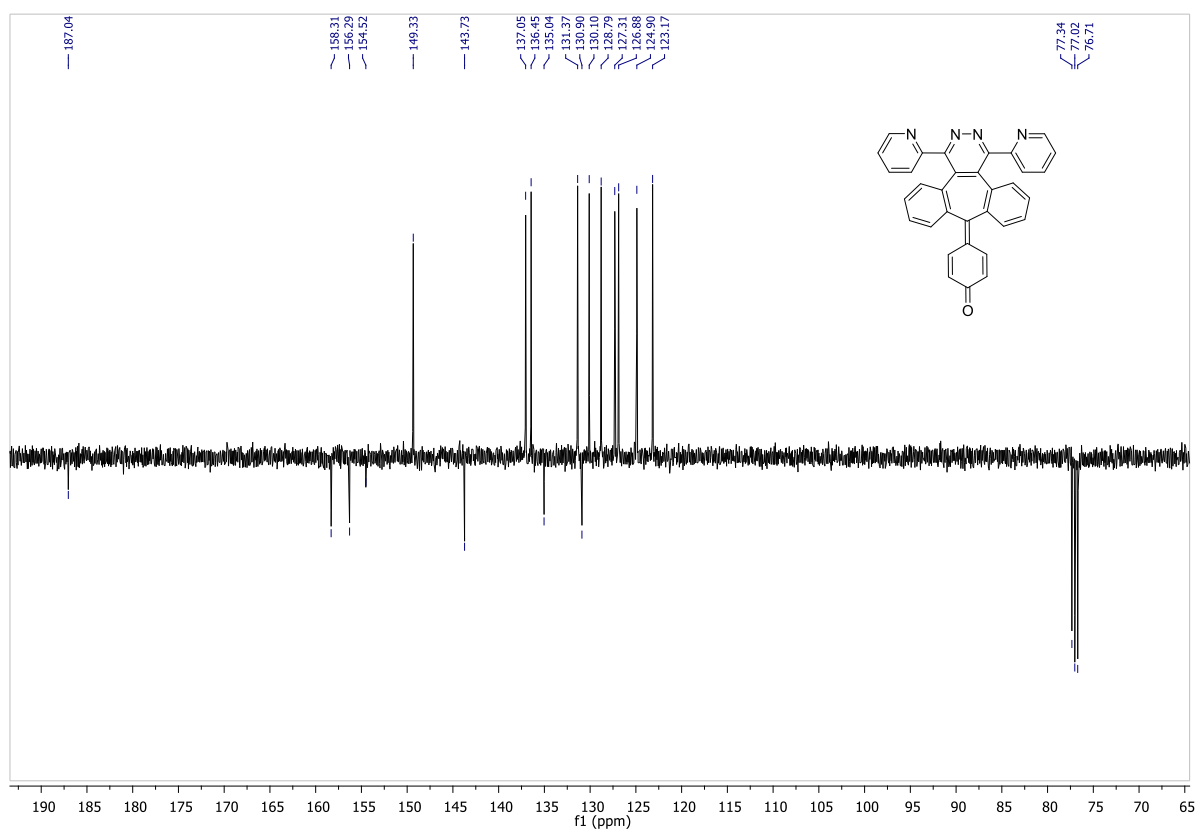

**Fig. S52.** <sup>13</sup>C-NMR spectrum of **14b** (100 MHz, CDCl<sub>3</sub>).

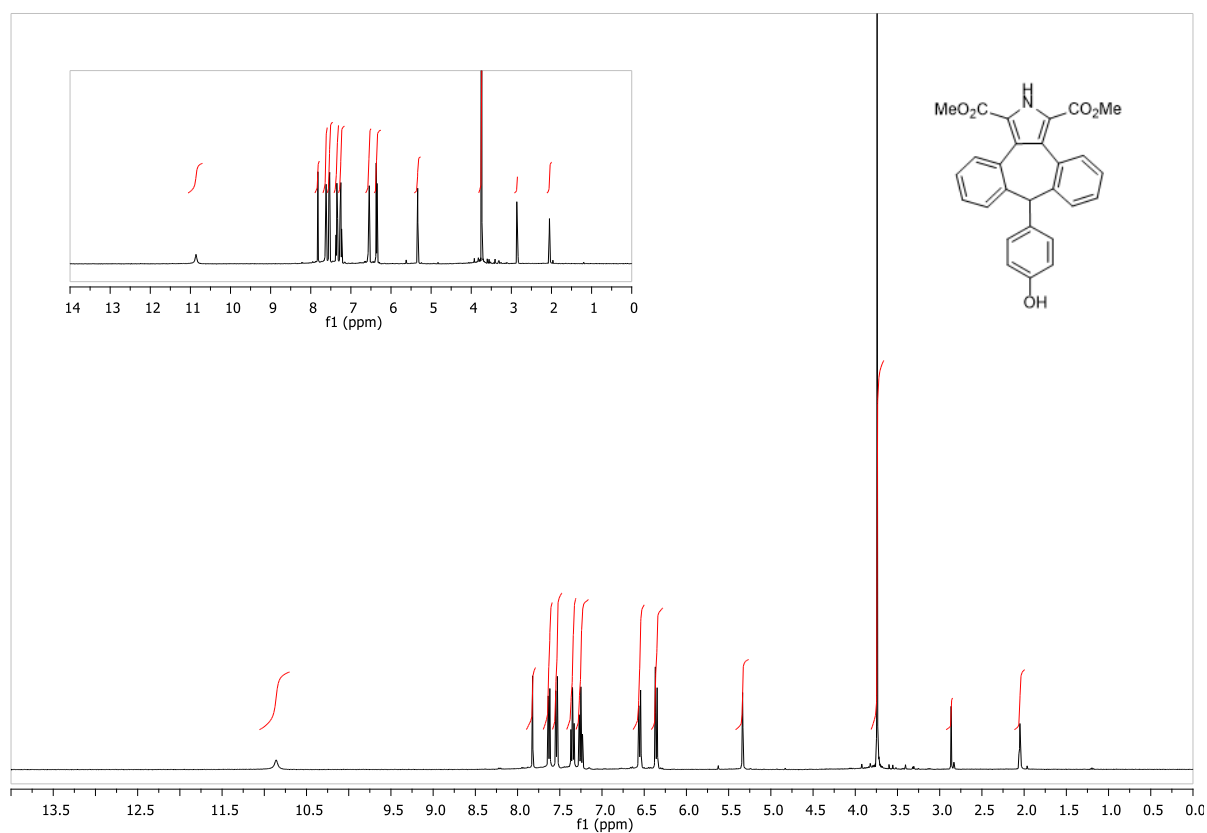

**Fig. S53.** <sup>1</sup>H-NMR spectrum of **15a** (400 MHz, acetone-*d*<sub>6</sub>).

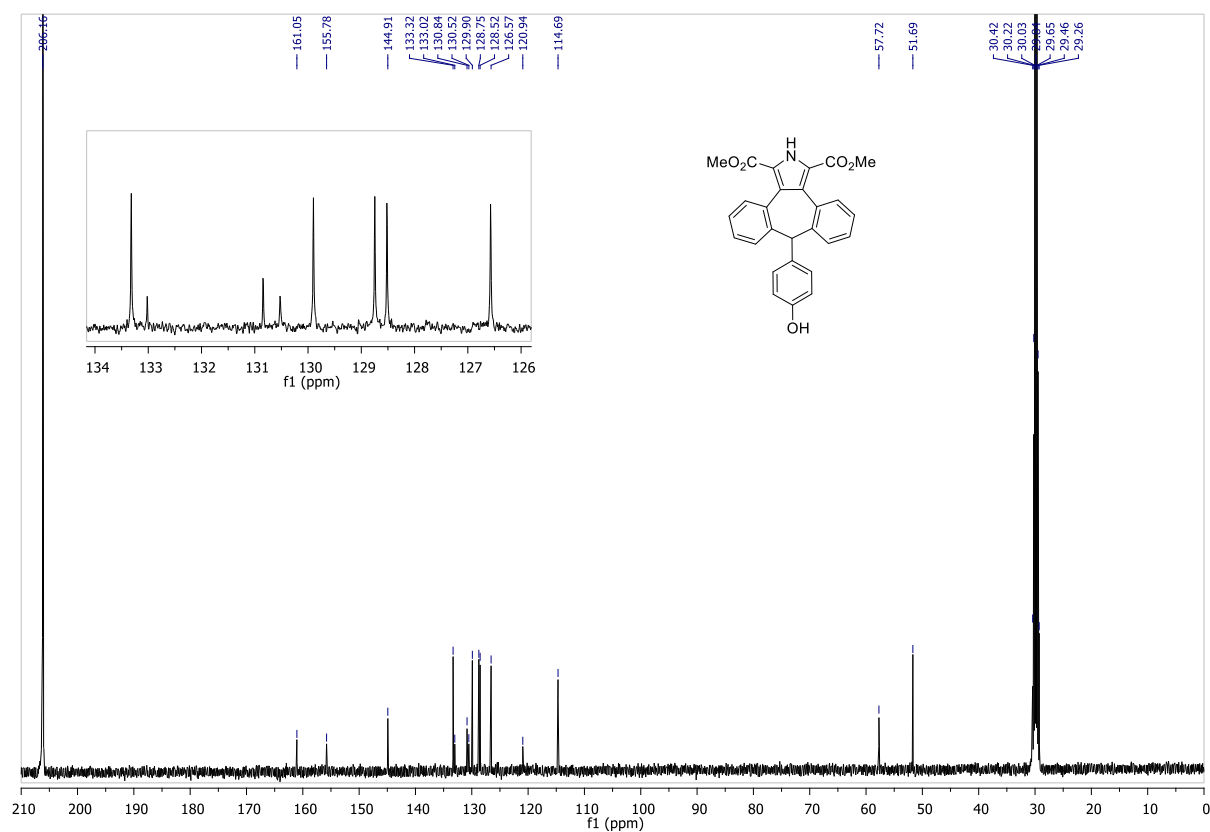

**Fig. S54.** <sup>13</sup>C-NMR spectrum of **15a** (100 MHz, acetone-*d*<sub>6</sub>).

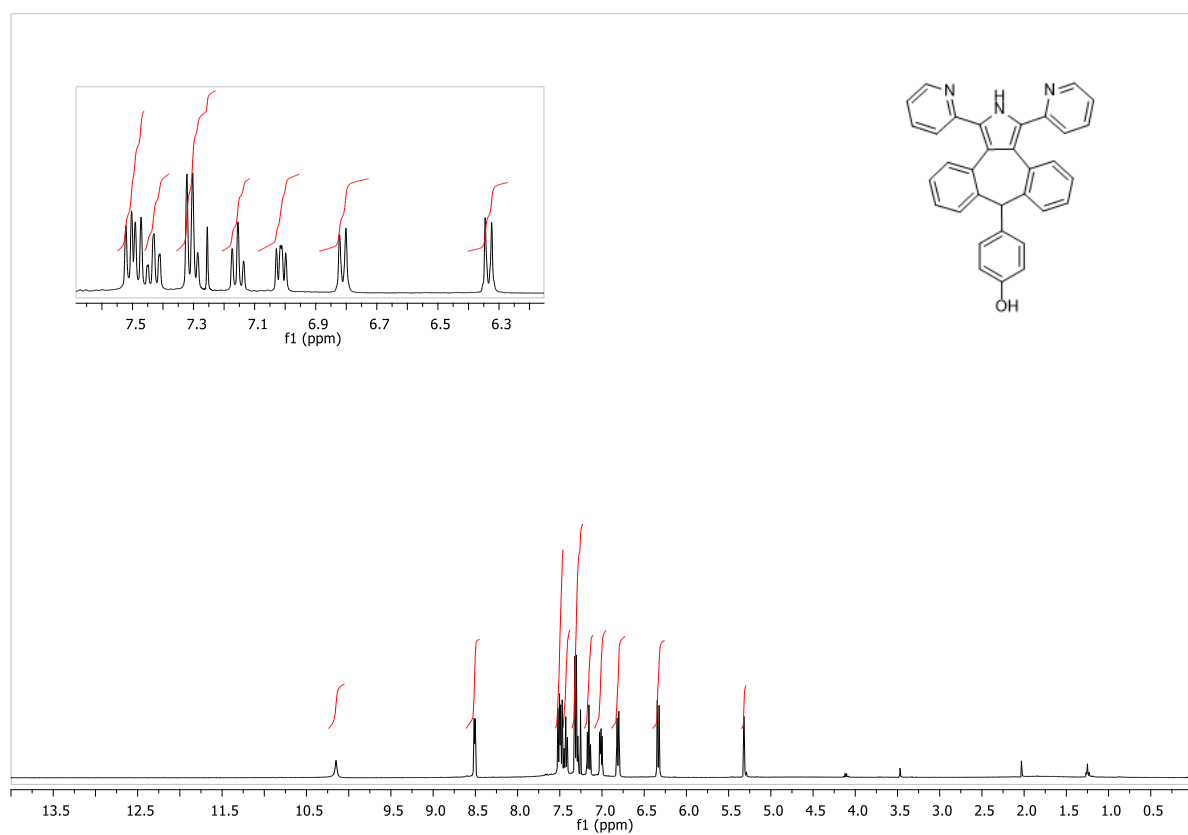

**Fig. S55.** <sup>1</sup>H-NMR spectrum of **15b** (400 MHz, CDCl<sub>3</sub>).

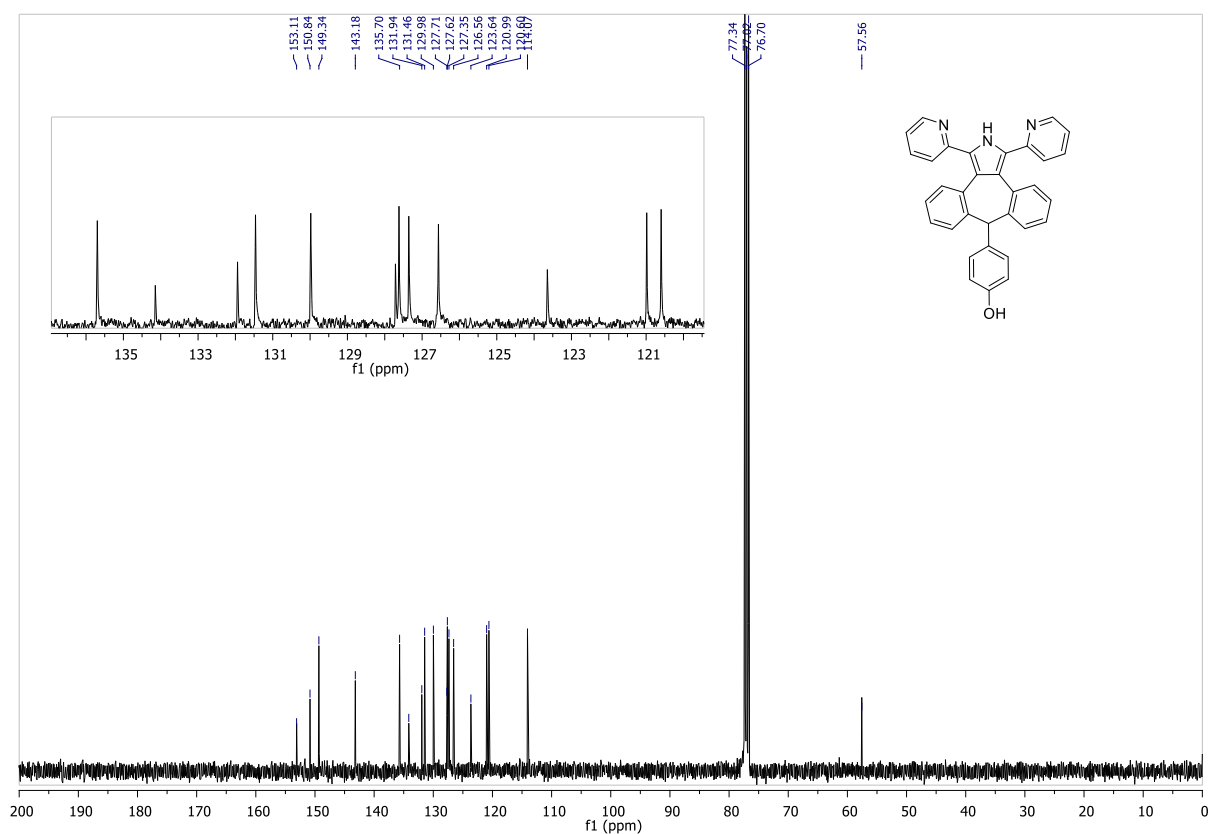

**Fig. S56.** <sup>13</sup>C-NMR spectrum of **15b** (100 MHz, CDCl<sub>3</sub>).

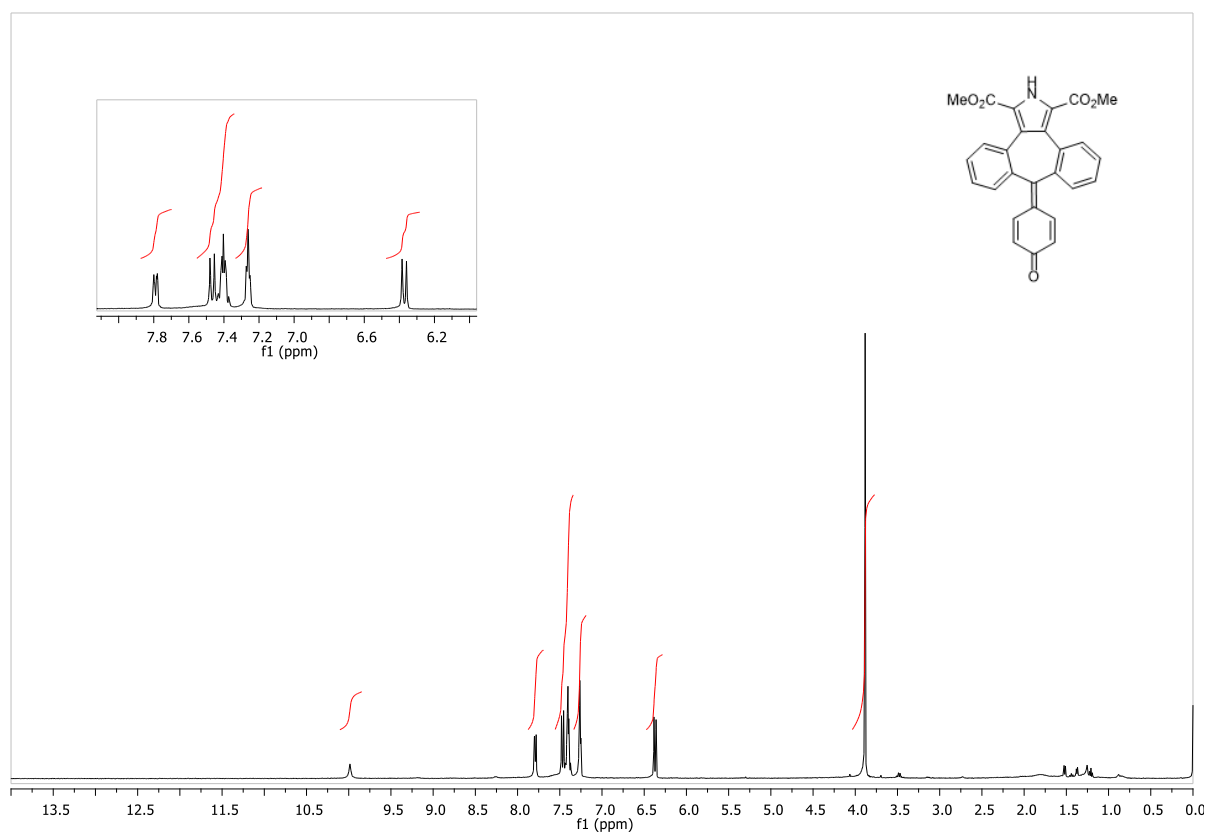

**Fig. S57.** <sup>1</sup>H-NMR spectrum of **16a** (400 MHz, CDCl<sub>3</sub>).

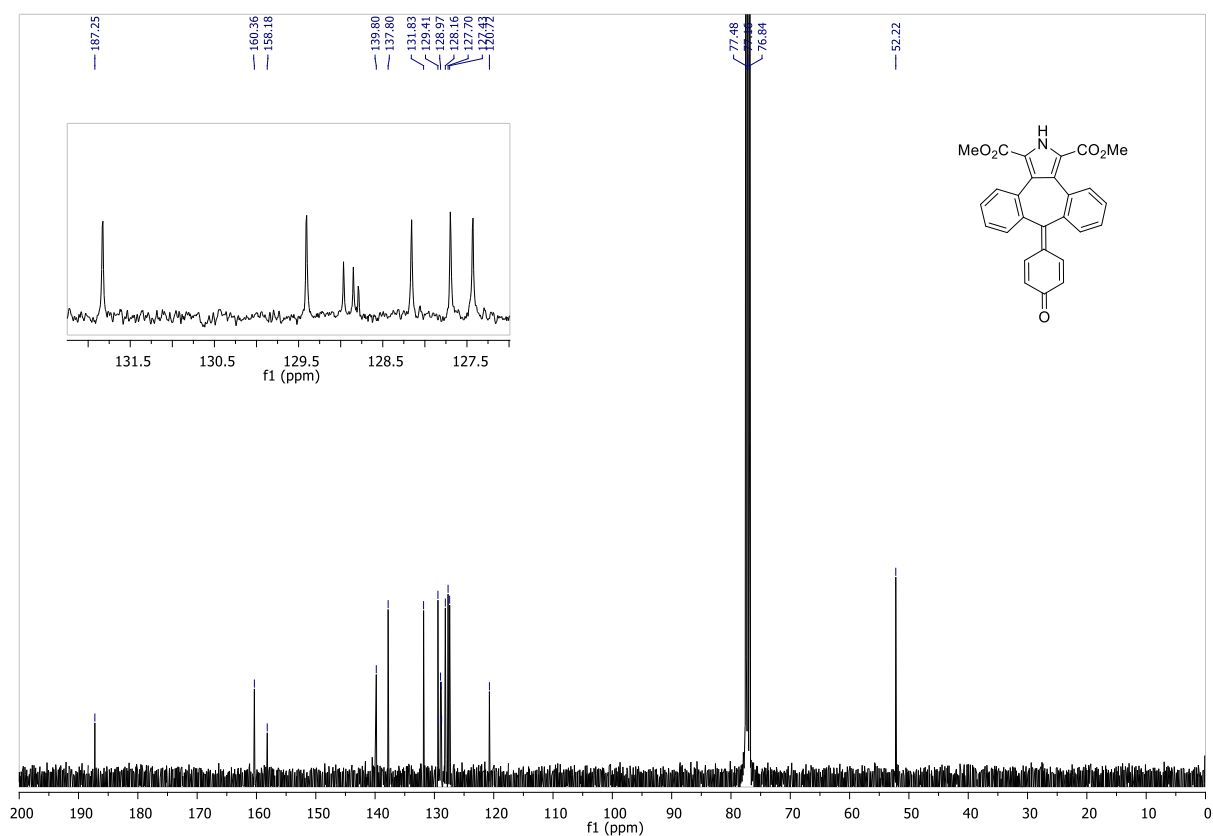

**Fig. S58.** <sup>13</sup>C-NMR spectrum of **16a** (100 MHz, CDCl<sub>3</sub>).

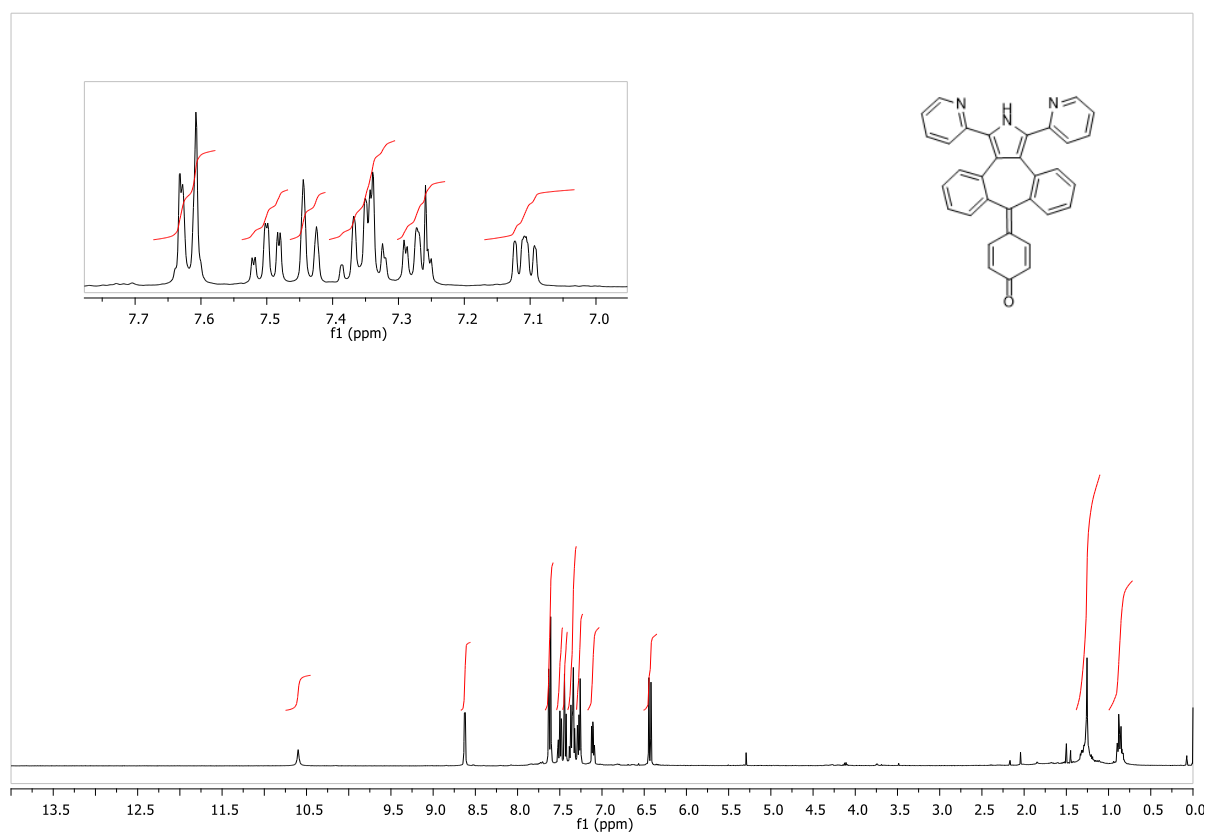

**Fig. S59.** <sup>1</sup>H-NMR spectrum of **16b** (400 MHz, CDCl<sub>3</sub>).

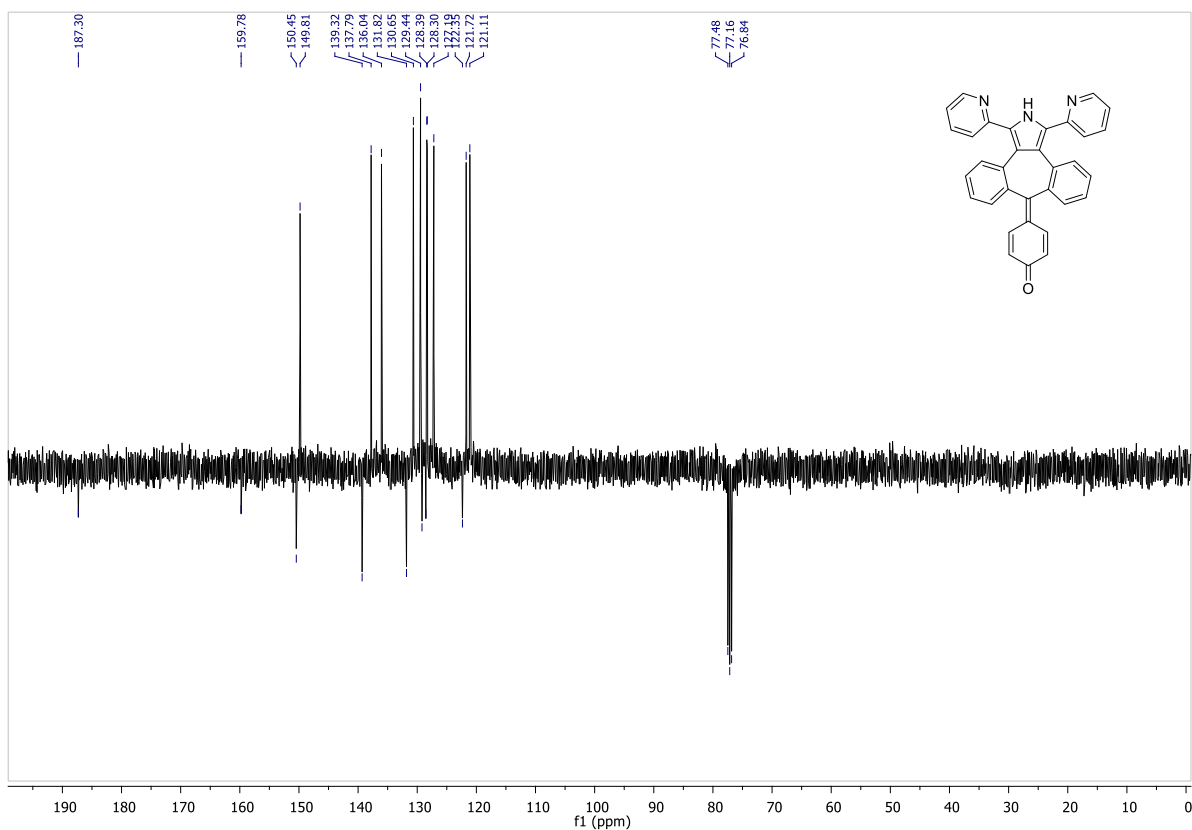

**Fig. S60.** <sup>13</sup>C-NMR spectrum of **16b** (100 MHz, CDCl<sub>3</sub>).

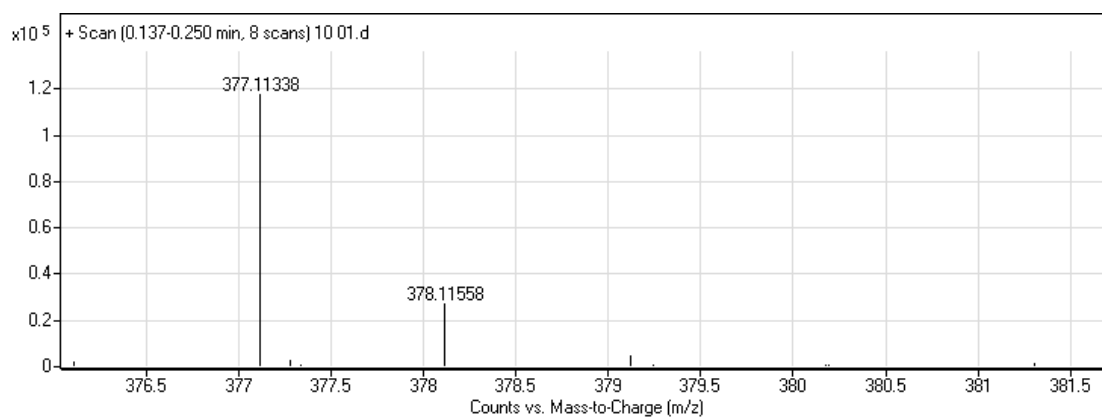

**Fig. S61.** HRMS spectrum of **3a**.

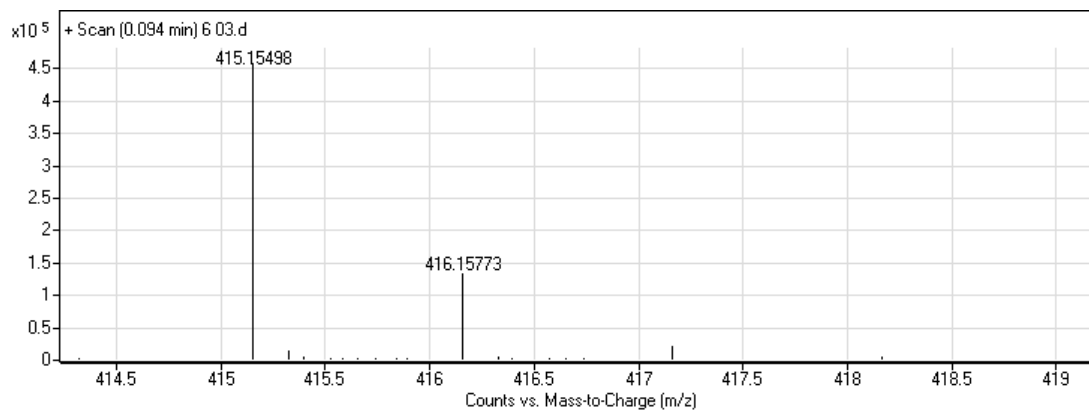

**Fig. S62.** HRMS spectrum of **3b**.

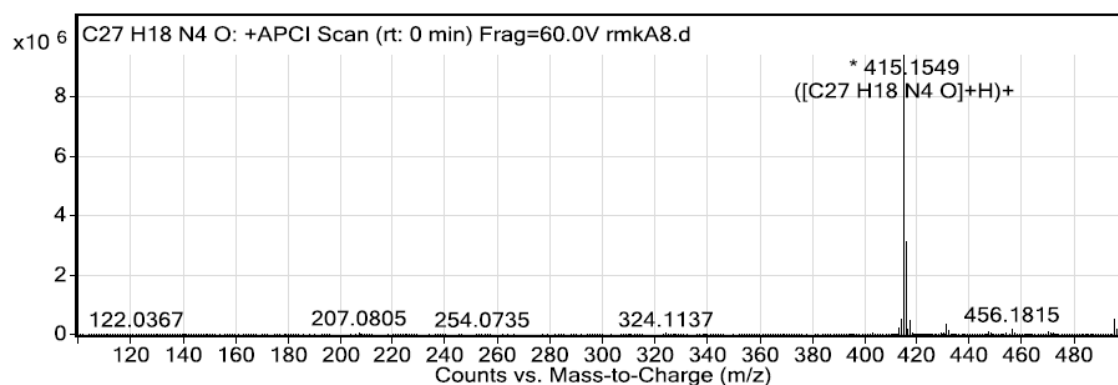

**Fig. S63.** HRMS spectrum of **3c**.

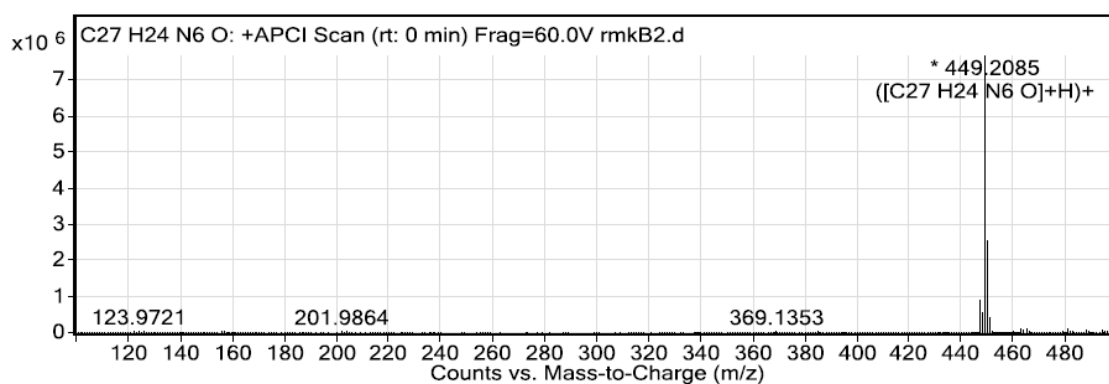

**Fig. S64.** HRMS spectrum of **3d**.

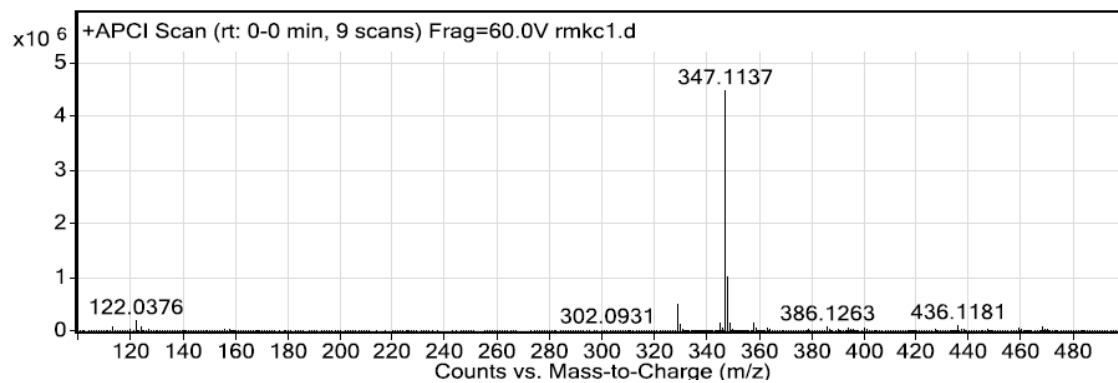

**Fig. S65.** HRMS spectrum of **3e**.

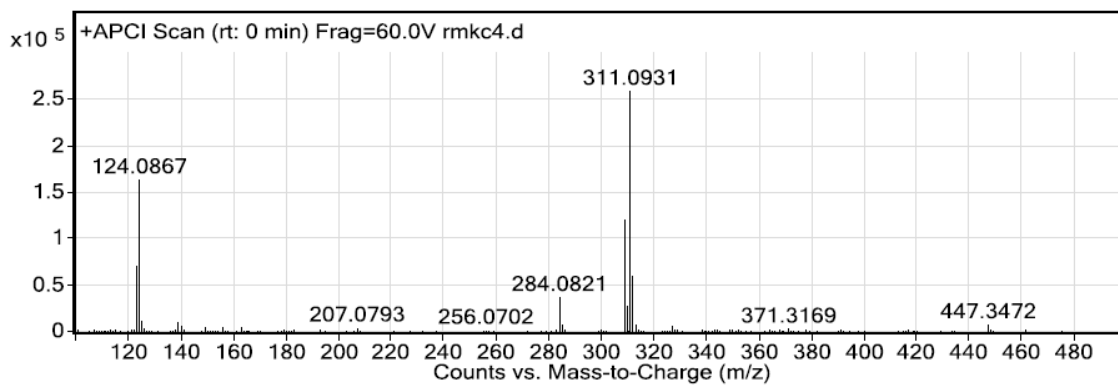

**Fig. S66.** HRMS spectrum of **3f**.

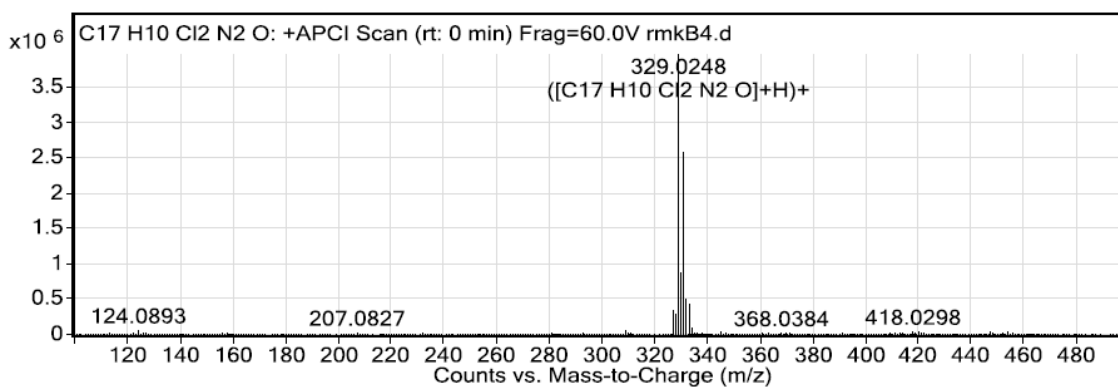

**Fig. S67.** HRMS spectrum of **3k**.

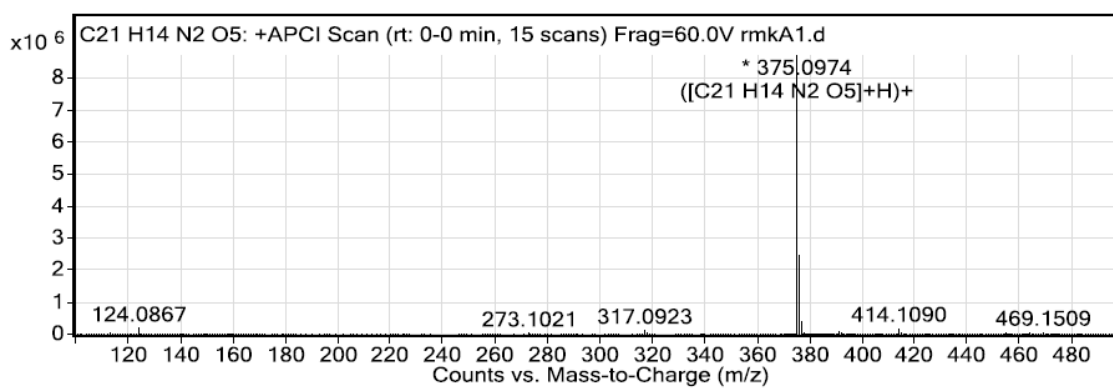

**Fig. S68.** HRMS spectrum of **4a**.

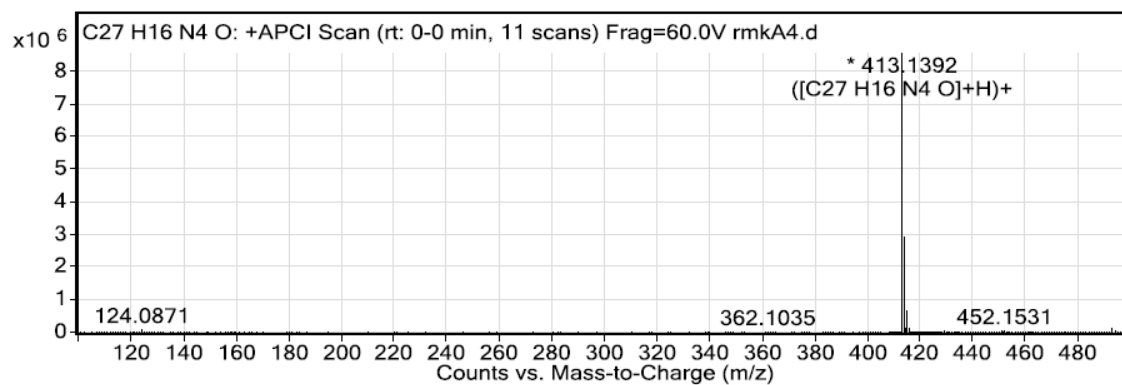

**Fig. S69.** HRMS spectrum of **4b**.

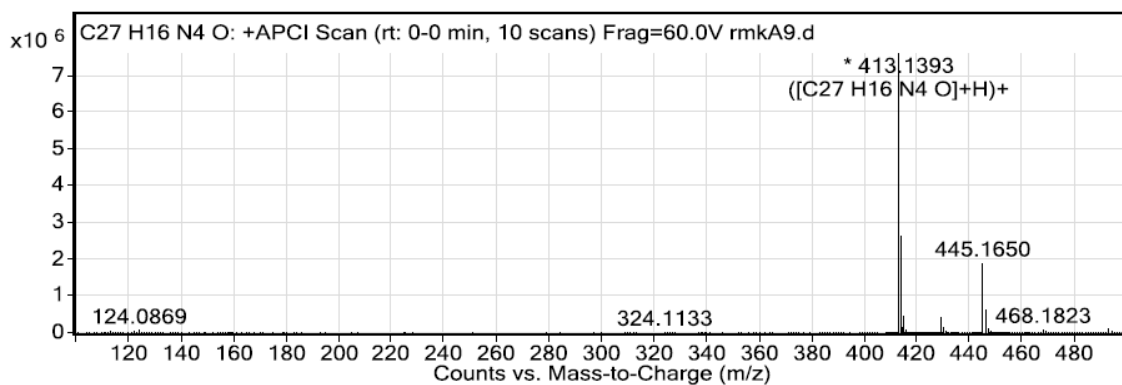

**Fig. S70.** HRMS spectrum of **4c**.

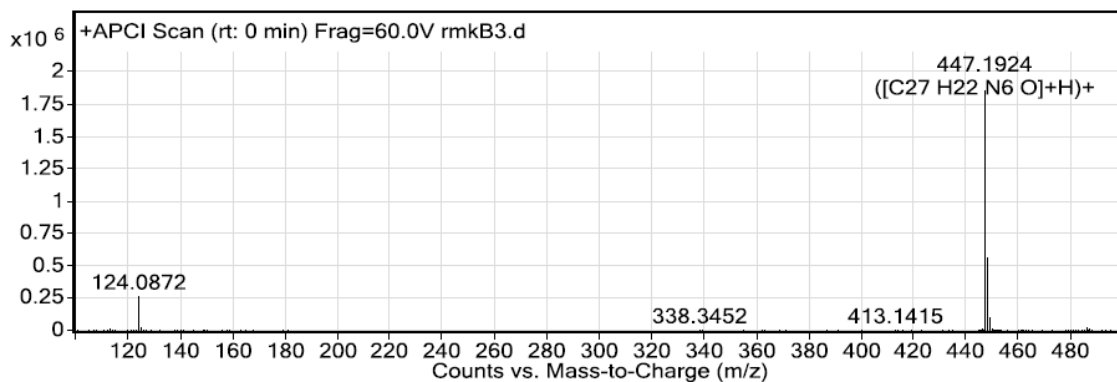

**Fig. S71.** HRMS spectrum of **4d**.

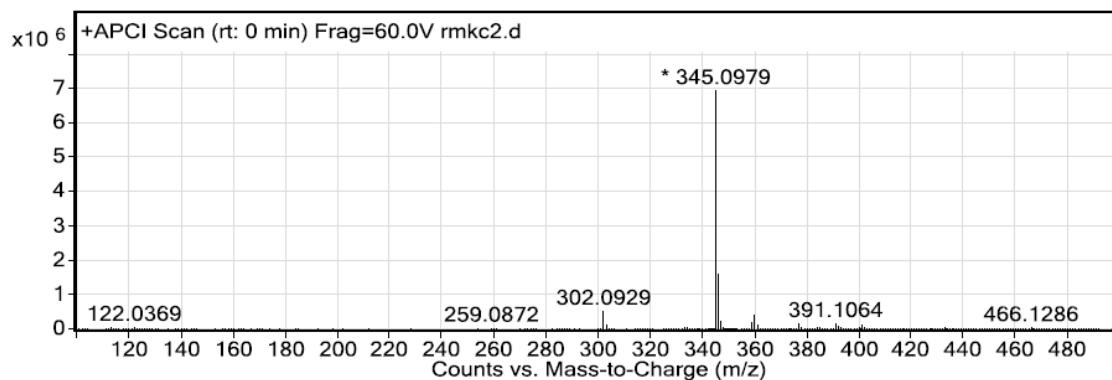

**Fig. S72.** HRMS spectrum of **4e**.

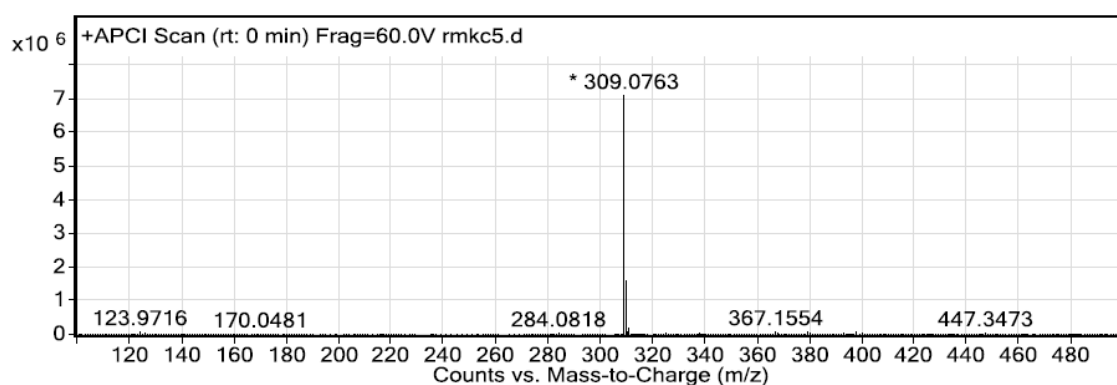

**Fig. S73.** HRMS spectrum of **4f**.

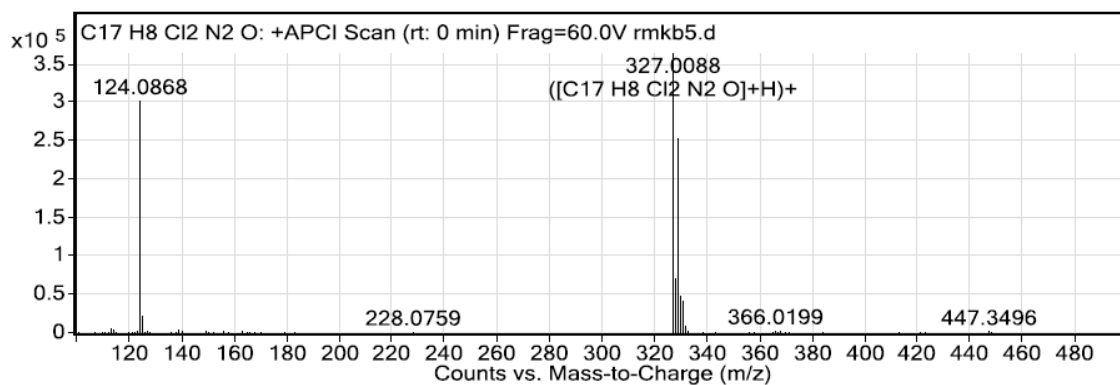

**Fig. S74.** HRMS spectrum of **4k**.

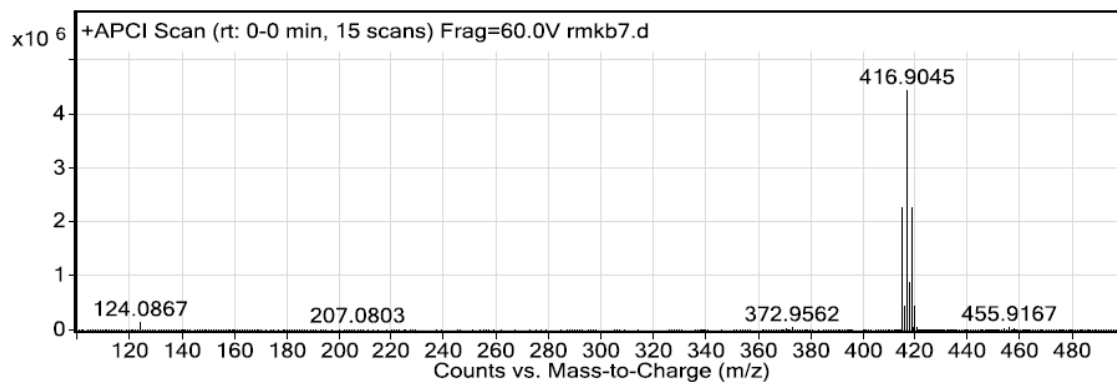

**Fig. S75.** HRMS spectrum of **4l**.

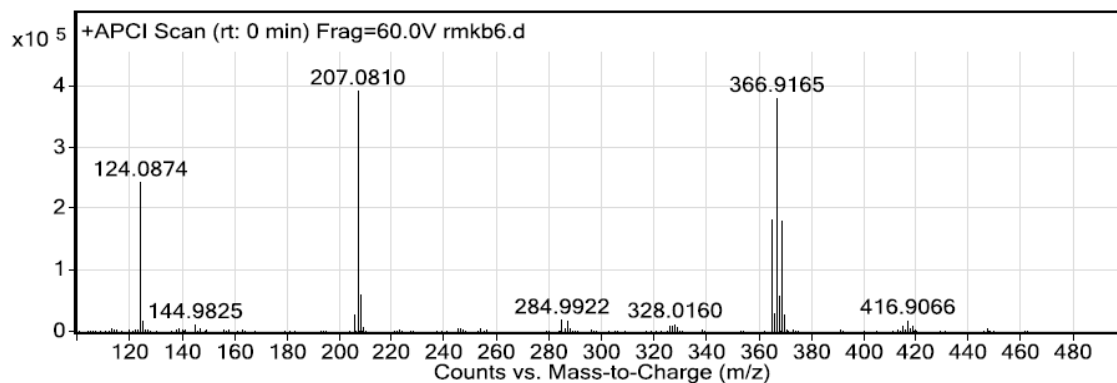

**Fig. S76.** HRMS spectrum of **5l**.

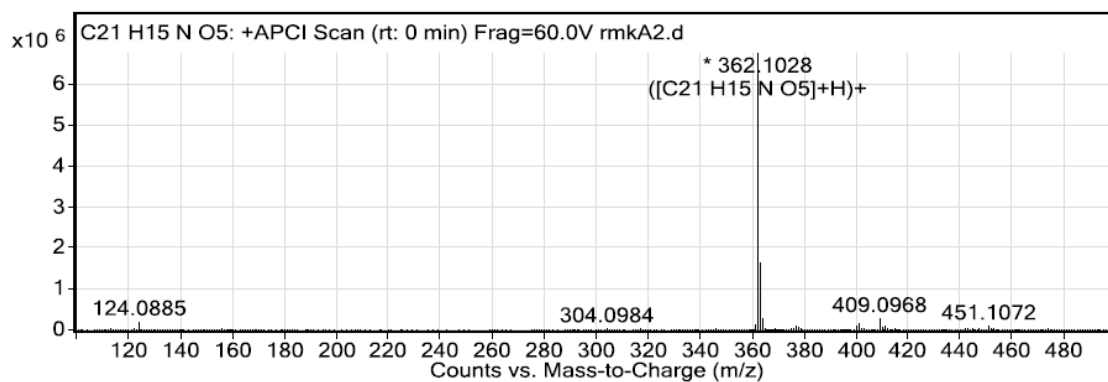

**Fig. S77.** HRMS spectrum of **10aa**.

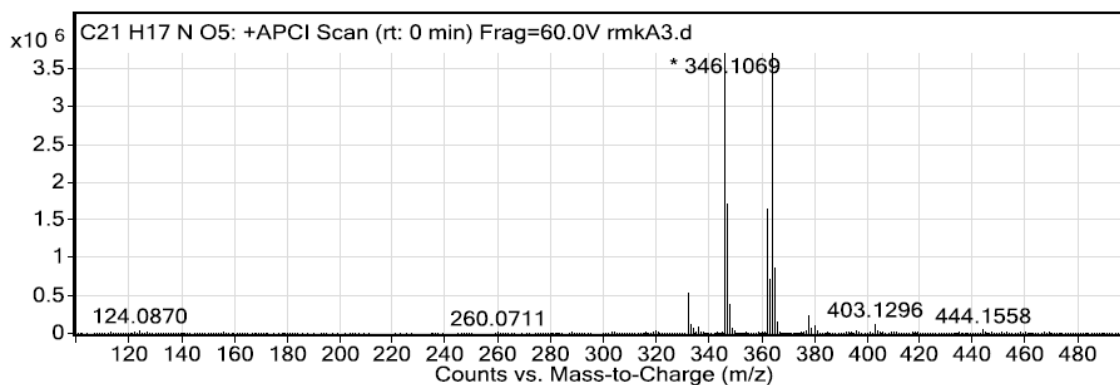

Peak List

| m/z      | z | Abund      | Formula      | Ion    |
|----------|---|------------|--------------|--------|
| 332.0923 | 1 | 531838.31  |              |        |
| 346.1069 | 1 | 6860042.5  |              |        |
| 347.1101 | 1 | 1711142.75 |              |        |
| 348.1179 | 1 | 377347.03  |              |        |
| 362.1019 | 1 | 1651337.13 |              |        |
| 363.1077 | 1 | 719684.31  |              |        |
| 364.1171 | 1 | 3694491.75 | C21 H17 N O5 | (M+H)+ |
| 365.1208 | 1 | 864817.25  | C21 H17 N O5 | (M+H)+ |
| 366.1245 | 1 | 140218.19  | C21 H17 N O5 | (M+H)+ |

Fig. S78. HRMS spectrum of **10ab**.

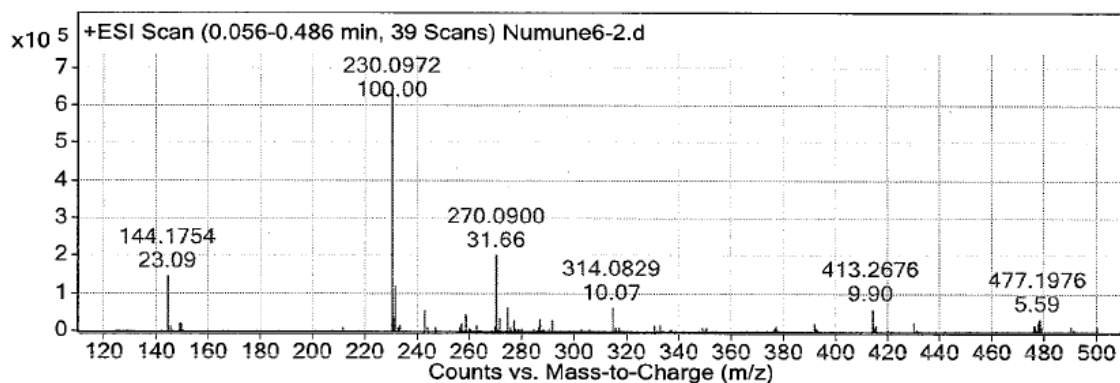

Fig. S79. HRMS spectrum of **10ac**.

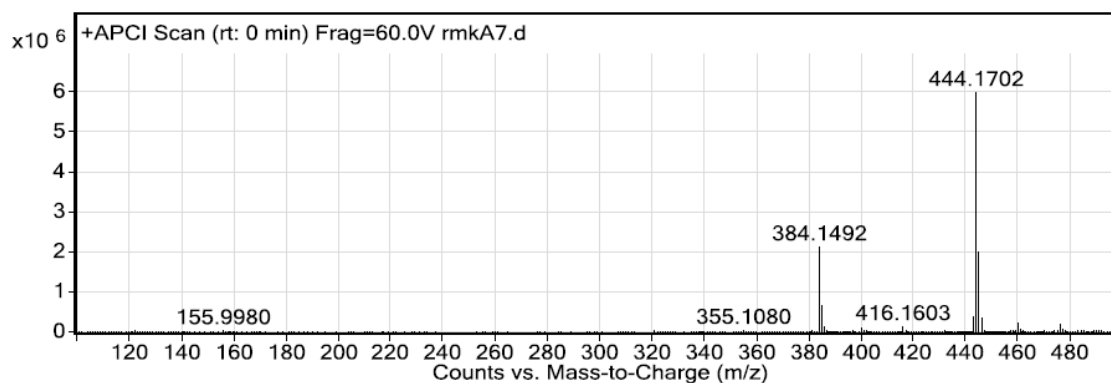

Fig. S80. HRMS spectrum of **10ba**.

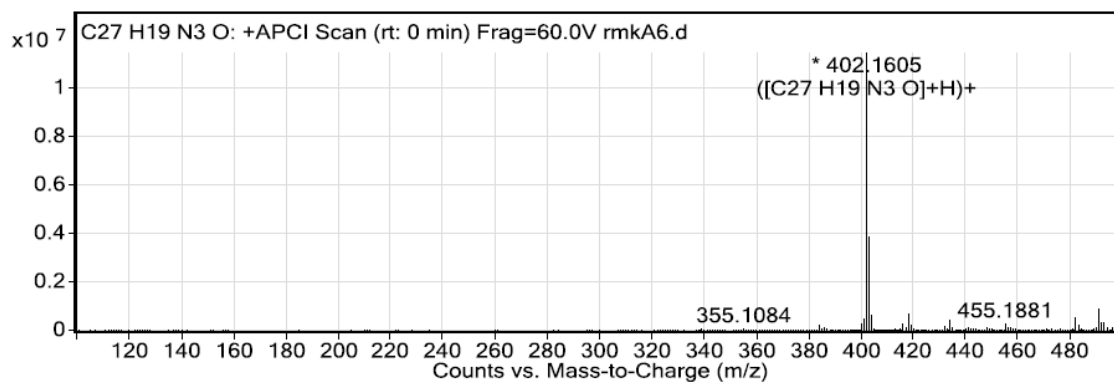

**Fig. S81.** HRMS spectrum of **10bb**.

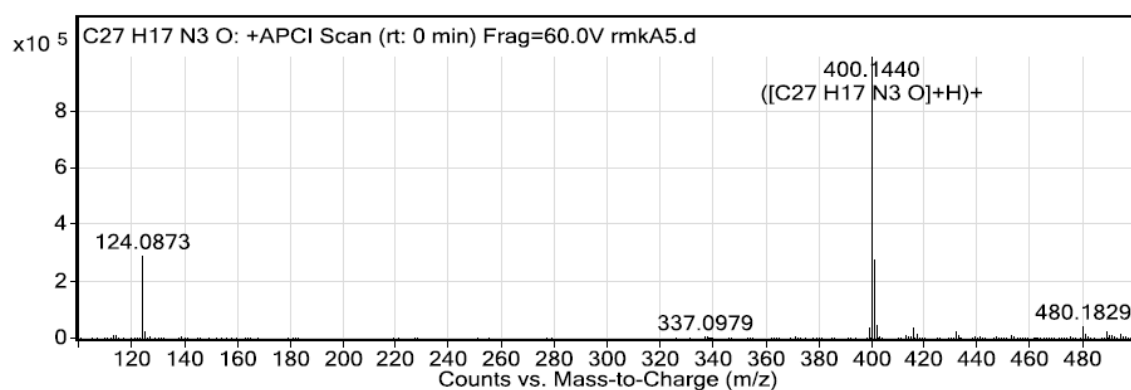

**Fig. S82.** HRMS spectrum of **10bc**.

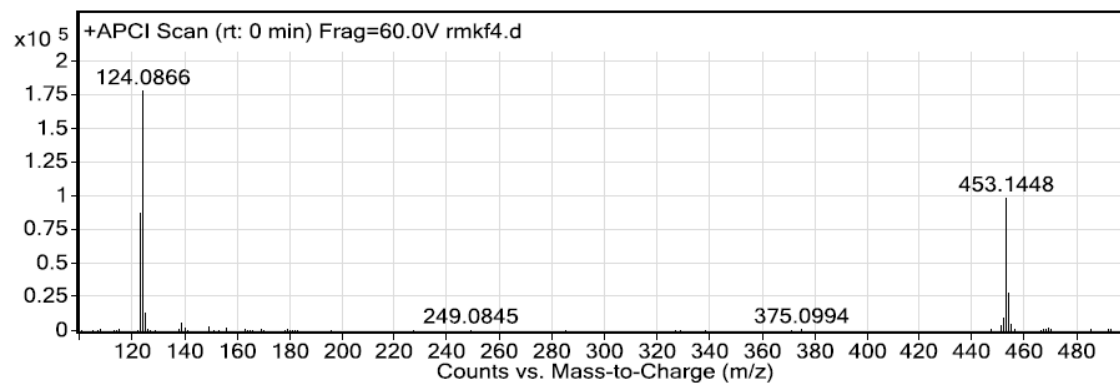

**Fig. S83.** HRMS spectrum of **13a**.

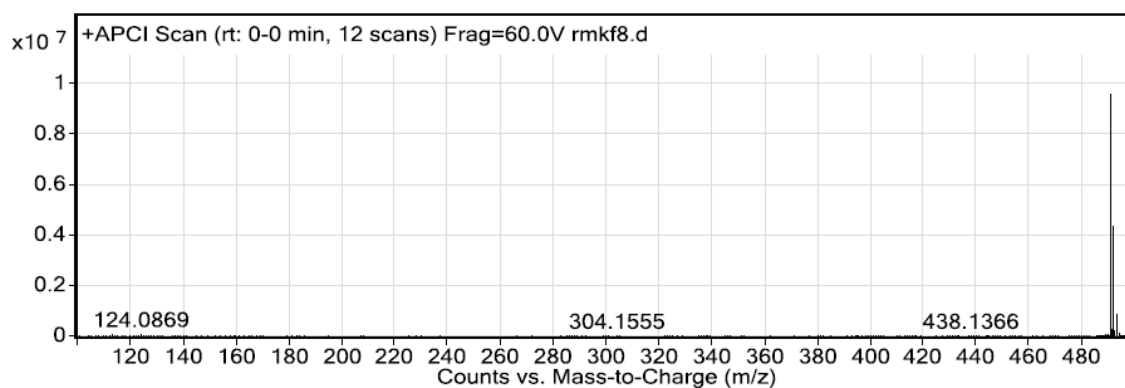

**Peak List**

| <i>m/z</i> | <i>z</i> | Abund     |
|------------|----------|-----------|
| 491.1872   | 1        | 9567481   |
| 491.3647   |          | 254643.7  |
| 492.1893   | 1        | 4344499.5 |
| 492.3722   | 1        | 215148.05 |
| 493.1926   | 1        | 840233.56 |
| 494.1972   | 1        | 101482.65 |
| 571.2254   | 1        | 184560.77 |
| 580.1902   | 1        | 356810.16 |
| 581.1944   | 1        | 145989.55 |

**Fig. S84.** HRMS spectrum of **13b**.

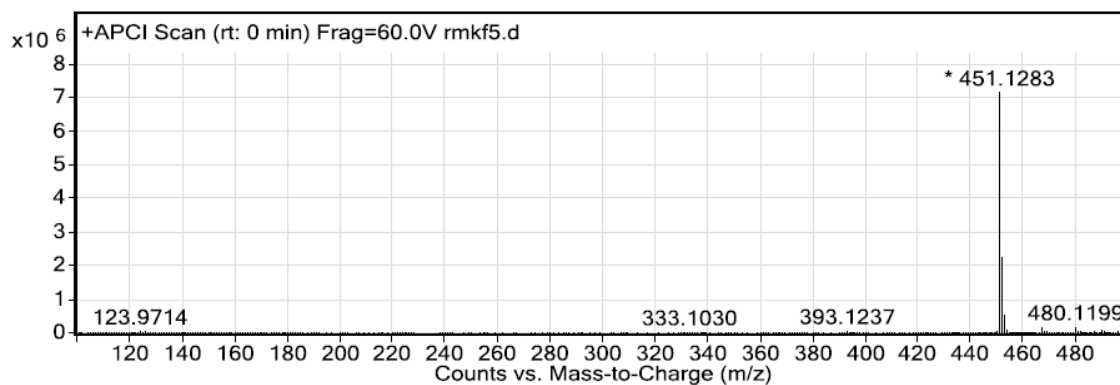

**Fig. S85.** HRMS spectrum of **14a**.

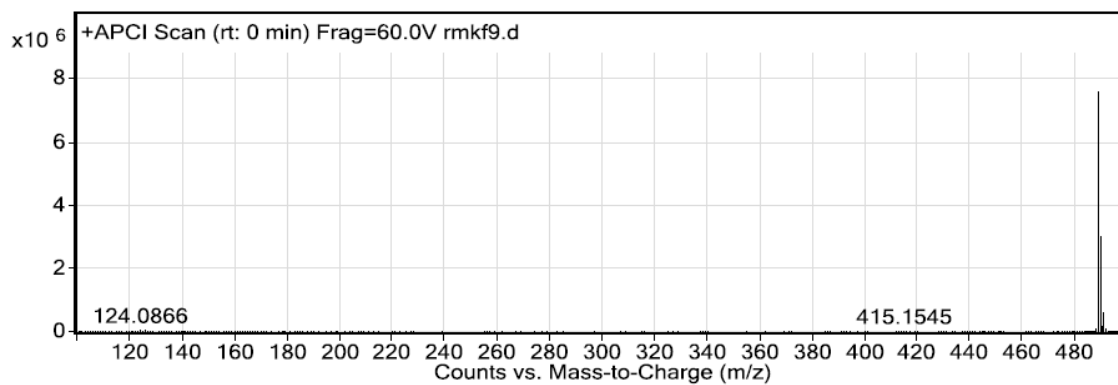

Peak List

| m/z      | z | Abund     |
|----------|---|-----------|
| 489.17   | 1 | 7575265.5 |
| 490.1727 | 1 | 3012450   |
| 490.3567 |   | 160626.06 |
| 491.1771 | 1 | 591821.5  |
| 505.1662 | 1 | 218175.23 |
| 518.1615 | 1 | 268632.13 |
| 569.2088 | 1 | 178846.02 |
| 578.1732 | 1 | 910204.31 |
| 579.178  | 1 | 378927.06 |

Fig. S86. HRMS spectrum of **14b**.

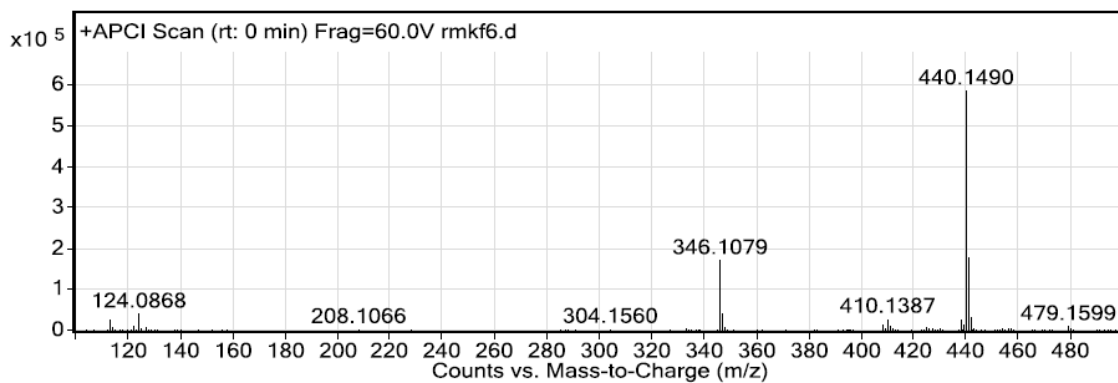

Fig. S87. HRMS spectrum of **15a**.

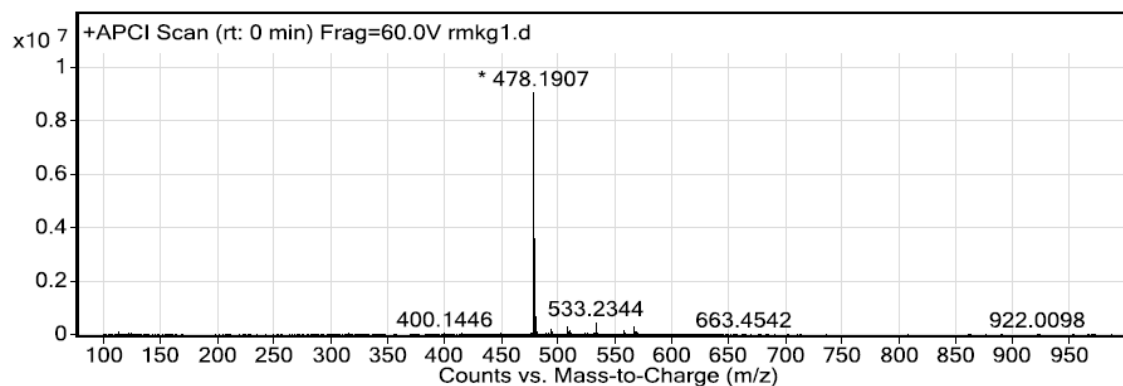

Fig. S88. HRMS spectrum of **15b**.

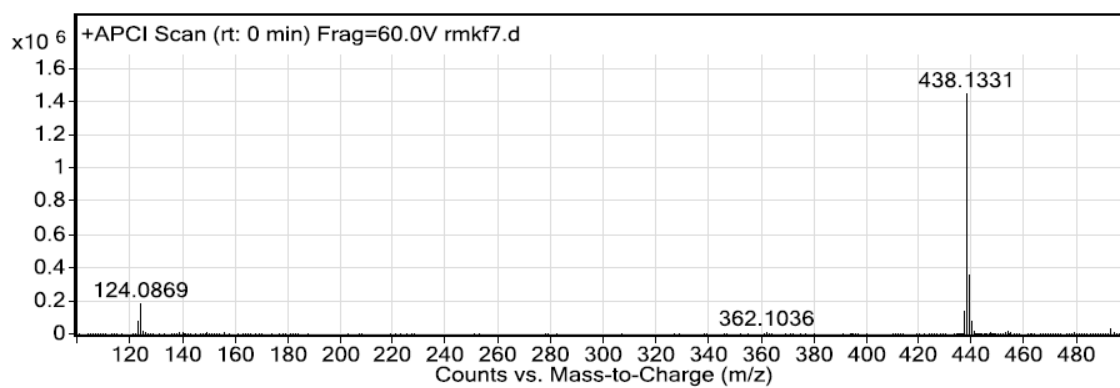

**Fig. S89.** HRMS spectrum of **16a**.

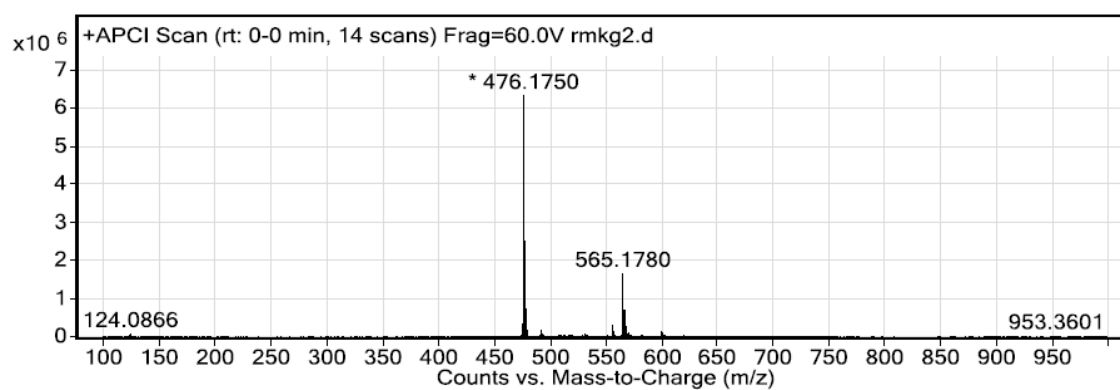

**Fig. S90.** HRMS spectrum of **16b**.
